# Supplementary material for: A Deep Learning System to Predict the Histopathological Results From Urine Cytopathological Images
Source: Front Oncol. 2022 May 24;12:901586. doi: 10.3389/fonc.2022.901586 (PMC9170952; doi:10.3389/fonc.2022.901586)
Supplement: Supplementary file 2 [file Table_1.xlsx]

## Sheet: Preliminary_Test
1=true	possibility	image ID and location (last 4 values)
0	40.0	c15-725_20150827_02__382__69__438__116
0	40.0	c15-802_20150928_02__970__519__1027__568
0	40.0	c15-802_20150928_02__446__331__503__373
0	40.0	c19-0677_20190819_01__431__560__502__621
0	40.0	c19-0677_20190819_01__236__783__300__841
0	40.0	c19-0677_20190819_01__834__699__895__751
0	40.0	c19-0677_20190819_01__782__829__846__888
0	40.0	c19-0677_20190819_01__1212__821__1287__895
0	40.0	c17-0452_20170717_01__683__716__735__758
0	40.0	c17-0452_20170717_01__368__651__443__711
0	40.0	c17-0452_20170717_01__1114__871__1166__913
1	40.0	c17-0452_20170717_01__1114__871__1166__913
1	40.0	c17-0452_20170717_01__1114__871__1166__913
1	40.0	c17-0452_20170717_01__1114__871__1166__913
1	40.0	c17-0452_20170717_01__1114__871__1166__913
1	40.0	c17-0452_20170717_01__1114__871__1166__913
1	40.0	c17-0452_20170717_01__1114__871__1166__913
0	40.0	c18-0020_20180109_01__636__709__716__774
1	40.0	c18-0020_20180109_01__636__709__716__774
1	40.0	c18-0020_20180109_01__636__709__716__774
1	40.0	c18-0020_20180109_01__636__709__716__774
1	40.0	c18-0020_20180109_01__636__709__716__774
1	40.0	c18-0020_20180109_01__636__709__716__774
0	40.0	c15-0323_20150422_01__83__479__140__525
1	40.0	c15-0323_20150422_01__83__479__140__525
0	40.0	c17-0266_20170427_01__834__909__890__951
0	40.0	c17-0280_20170508_01__761__460__831__516
1	40.0	c17-0280_20170508_01__761__460__831__516
1	40.0	c17-0280_20170508_01__761__460__831__516
1	40.0	c17-0280_20170508_01__761__460__831__516
1	40.0	c17-0280_20170508_01__761__460__831__516
1	40.0	c17-0280_20170508_01__761__460__831__516
1	40.0	c17-0280_20170508_01__761__460__831__516
0	40.0	c18-0772_20181112_01__32__193__103__253
0	40.0	c17-0665_20170926_01__526__209__592__269
0	40.0	c17-0665_20170926_01__1118__711__1179__763
1	40.0	c17-0665_20170926_01__354__702__415__749
1	40.0	c17-0665_20170926_01__354__702__415__749
0	40.0	c15-1051_20151229_02__206__346__258__388
1	40.0	c15-1051_20151229_02__206__346__258__388
0	40.0	c18-0746_20181101_01__980__857__1041__909
0	40.0	c18-0245_20180416_01__229__516__281__553
0	40.0	c18-0245_20180416_01__4__355__70__407
0	40.0	c18-0245_20180416_01__970__505__1034__564
0	40.0	c18-0245_20180416_01__523__13__584__65
0	40.0	c18-0245_20180416_01__601__616__657__663
1	40.0	c18-0610_20180907_02__870__841__948__908
1	40.0	c18-0610_20180907_02__870__841__948__908
1	40.0	c18-0610_20180907_02__870__841__948__908
0	40.0	c16-689_20160921_01__624__327__676__365
0	40.0	c16-689_20160921_01__963__479__1033__539
0	40.0	c16-689_20160921_01__742__918__794__955
1	40.0	c16-689_20160921_01__742__918__794__955
0	40.0	c16-616_20160822_01__697__179__749__230
0	40.0	c16-616_20160822_01__441__332__521__402
0	40.0	c16-616_20160822_01__619__4__695__69
0	40.0	c16-616_20160822_01__1008__388__1088__458
1	40.0	c16-616_20160822_01__1008__388__1088__458
1	40.0	c16-616_20160822_01__1008__388__1088__458
1	40.0	c16-616_20160822_01__1008__388__1088__458
1	40.0	c16-616_20160822_01__1008__388__1088__458
1	40.0	c16-616_20160822_01__1008__388__1088__458
1	40.0	c16-616_20160822_01__1008__388__1088__458
1	40.0	c16-616_20160822_01__1008__388__1088__458
1	40.0	c16-616_20160822_01__1008__388__1088__458
1	40.0	c16-616_20160822_01__1008__388__1088__458
1	40.0	c16-616_20160822_01__1008__388__1088__458
1	40.0	c16-616_20160822_01__1008__388__1088__458
1	40.0	c16-616_20160822_01__1008__388__1088__458
0	40.0	c18-0562_20180822_01__253__669__305__711
0	40.0	c18-0562_20180822_01__476__579__533__625
0	40.0	c18-0562_20180822_01__178__594__227__628
1	40.0	c18-0562_20180822_01__178__594__227__628
0	40.0	c15-1002_20151210_01__809__733__873__787
0	40.0	c18-0852_20181213_01__197__679__258__730
0	40.0	c18-0852_20181213_01__316__235__368__281
0	40.0	c15-0477_20150609_01__717__432__778__488
0	40.0	c15-0477_20150609_01__622__423__679__474
0	40.0	c15-0477_20150609_01__1127__46__1184__93
0	40.0	c15-0477_20150609_01__27__18__89__69
0	40.0	c18-0064_20180126_01__1212__527__1282__593
0	40.0	c17-0360_20170607_01__156__507__208__549
0	40.0	c17-0360_20170607_01__730__205__801__273
1	40.0	c17-0360_20170607_01__730__205__801__273
0	40.0	c15-0331_20150423_01__268__599__324__641
0	40.0	c18-0252_20180416_01__958__825__1010__871
0	40.0	c18-0252_20180416_01__114__221__176__272
0	40.0	c15-1032_20151224_01__866__637__942__716
0	40.0	c15-1032_20151224_01__547__764__685__888
0	40.0	c15-0257_20150407_02__469__611__525__658
1	40.0	c15-0257_20150407_02__469__611__525__658
0	40.0	c19-0419_20190605_01__967__755__1019__797
0	40.0	c16-73_20160203_01__1114__418__1175__469
0	40.0	c16-73_20160203_01__500__41__575__107
0	40.0	c16-73_20160203_01__441__788__516__863
0	40.0	c16-73_20160203_01__486__369__552__430
0	40.0	c15-953_20151120_01__60__193__145__272
1	40.0	c15-953_20151120_01__60__193__145__272
1	40.0	c15-953_20151120_01__60__193__145__272
1	40.0	c18-0764_20181107_02__559__410__611__452
1	40.0	c18-0764_20181107_02__559__410__611__452
1	40.0	c18-0764_20181107_02__559__410__611__452
1	40.0	c18-0764_20181107_02__559__410__611__452
1	40.0	c18-0764_20181107_02__559__410__611__452
1	40.0	c18-0764_20181107_02__559__410__611__452
1	40.0	c18-0764_20181107_02__559__410__611__452
0	40.0	c16-761_20161021_01__737__530__808__591
0	40.0	c18-0428_20180702_01__260__583__322__639
0	40.0	c18-0428_20180702_01__229__793__286__839
0	40.0	c18-0428_20180702_01__65__299__149__374
0	40.0	c18-0428_20180702_01__302__460__387__539
1	40.0	c18-0428_20180702_01__302__460__387__539
1	40.0	c18-0428_20180702_01__302__460__387__539
1	40.0	c18-0428_20180702_01__302__460__387__539
0	40.0	c16-352_20160525_02__1240__593__1282__653
0	40.0	c15-0130_20150228_01__874__126__931__173
0	40.0	c20-0019_20200110_01__399__655__460__707
0	40.0	c20-0019_20200110_01__147__783__222__849
0	40.0	c18-0500_20180726_01__747__513__827__583
0	40.0	c18-0500_20180726_01__179__179__233__223
0	41.0	c15-802_20150928_02__206__818__272__871
0	41.0	c15-1029_20151230_02__804__99__861__147
0	41.0	c19-0677_20190819_01__1179__125__1245__186
0	41.0	c19-0677_20190819_01__1026__41__1092__97
0	41.0	c19-0677_20190819_01__549__155__620__216
0	41.0	c19-0677_20190819_01__514__237__570__288
0	41.0	c19-0677_20190819_01__805__804__869__857
0	41.0	c19-0677_20190819_01__802__83__865__135
0	41.0	c17-0452_20170717_01__908__599__956__641
0	41.0	c17-0452_20170717_01__1123__815__1179__862
0	41.0	c18-0020_20180109_01__175__797__227__839
1	41.0	c18-0020_20180109_01__82__165__157__235
0	41.0	c15-0323_20150422_01__316__128__370__175
0	41.0	c19-0716_20190830_01__397__860__442__888
1	41.0	c19-0716_20190830_01__397__860__442__888
0	41.0	c17-0266_20170427_01__476__848__533__895
0	41.0	c17-0266_20170427_01__440__550__498__602
1	41.0	c17-0266_20170427_01__536__135__593__181
0	41.0	c17-0280_20170508_01__1132__867__1212__946
0	41.0	c18-0772_20181112_01__265__195__392__381
0	41.0	c18-0772_20181112_01__348__106__426__178
0	41.0	c17-0665_20170926_01__723__853__794__918
0	41.0	c17-0665_20170926_01__184__665__246__711
0	41.0	c17-0665_20170926_01__243__60__305__116
0	41.0	c15-1051_20151229_02__944__483__987__521
0	41.0	c15-1051_20151229_02__739__762__789__804
0	41.0	c15-1051_20151229_02__829__569__895__621
0	41.0	c15-1051_20151229_02__971__239__1030__290
0	41.0	c15-1051_20151229_02__1085__607__1147__663
0	41.0	c15-1051_20151229_02__1051__83__1119__137
0	41.0	c15-1051_20151229_02__893__148__951__193
0	41.0	c15-1051_20151229_02__364__747__415__790
0	41.0	c15-1051_20151229_02__41__69__117__135
0	41.0	c18-0245_20180416_01__9__551__65__593
0	41.0	c18-0245_20180416_01__217__400__295__470
0	41.0	c16-689_20160921_01__-5__909__42__951
0	41.0	c16-689_20160921_01__883__913__935__955
0	41.0	c16-616_20160822_01__604__299__675__352
1	41.0	c16-616_20160822_01__780__290__858__360
0	41.0	c16-616_20160822_01__810__565__886__635
0	41.0	c18-0562_20180822_01__521__792__573__829
0	41.0	c18-0562_20180822_01__628__465__691__523
0	41.0	c18-0562_20180822_01__399__335__451__377
0	41.0	c18-0562_20180822_01__124__693__204__763
0	41.0	c18-0562_20180822_01__1085__811__1142__857
0	41.0	c15-1002_20151210_01__321__98__373__140
0	41.0	c15-0477_20150609_01__644__769__700__815
0	41.0	c15-0477_20150609_01__521__102__559__172
0	41.0	c15-0477_20150609_01__102__18__177__102
0	41.0	c18-0064_20180126_01__550__708__609__756
0	41.0	c18-0064_20180126_01__713__615__779__674
0	41.0	c17-0360_20170607_01__664__707__716__749
0	41.0	c15-0331_20150423_01__803__387__869__447
0	41.0	c18-0252_20180416_01__456__323__520__376
0	41.0	c18-0252_20180416_01__46__416__103__463
0	41.0	c18-0252_20180416_01__509__279__556__316
0	41.0	c18-0252_20180416_01__1127__239__1175__272
0	41.0	c18-0252_20180416_01__110__176__174__237
0	41.0	c16-107_20160222_01__786__548__844__596
0	41.0	c15-1032_20151224_01__340__426__425__519
0	41.0	c15-1032_20151224_01__619__311__683__377
0	41.0	c15-1032_20151224_01__302__99__392__179
0	41.0	c15-0257_20150407_02__737__792__803__853
0	41.0	c15-0257_20150407_02__1160__496__1214__538
0	41.0	c15-0257_20150407_02__1198__544__1254__586
0	41.0	c19-0419_20190605_01__817__541__873__588
0	41.0	c19-0419_20190605_01__792__337__858__383
0	41.0	c17-0910_20171215_01__469__830__525__881
0	41.0	c16-73_20160203_01__949__797__1005__844
0	41.0	c16-73_20160203_01__509__792__561__834
0	41.0	c16-73_20160203_01__1226__881__1282__932
0	41.0	c16-73_20160203_01__944__55__996__97
0	41.0	c16-73_20160203_01__801__127__862__179
0	41.0	c16-73_20160203_01__378__451__433__497
0	41.0	c16-73_20160203_01__284__237__368__316
0	41.0	c16-73_20160203_01__876__416__937__467
0	41.0	c16-73_20160203_01__908__232__960__274
0	41.0	c15-953_20151120_01__1017__13__1125__107
0	41.0	c18-0428_20180702_01__323__400__398__475
0	41.0	c18-0428_20180702_01__554__555__615__607
0	41.0	c18-0428_20180702_01__691__-1__747__51
0	41.0	c18-0428_20180702_01__374__419__437__471
0	41.0	c16-352_20160525_02__4__227__70__283
0	41.0	c16-352_20160525_02__843__46__900__93
0	41.0	c16-352_20160525_02__1160__497__1245__572
0	41.0	c16-352_20160525_02__669__698__737__756
0	41.0	c16-352_20160525_02__683__759__735__804
0	41.0	c15-0130_20150228_01__1146__706__1212__766
0	41.0	c15-0130_20150228_01__-5__885__51__932
0	41.0	c15-0130_20150228_01__1209__726__1273__782
0	41.0	c15-0130_20150228_01__1104__13__1180__79
0	41.0	c15-0130_20150228_01__735__-1__787__43
0	41.0	c20-0019_20200110_01__866__146__918__188
0	41.0	c20-0019_20200110_01__430__599__491__646
0	41.0	c20-0019_20200110_01__106__793__168__854
0	41.0	c20-0019_20200110_01__279__53__343__106
0	41.0	c18-0500_20180726_01__514__4__575__55
0	41.0	c19-0840_20191016_01__46__255__112__311
0	42.0	c16-398_20160612_01__971__399__1028__446
0	42.0	c16-398_20160612_01__824__160__890__225
0	42.0	c15-802_20150928_02__674__112__728__156
0	42.0	c15-635_20150722_01__260__510__328__578
0	42.0	c15-1029_20151230_02__870__394__929__443
0	42.0	c19-0677_20190819_01__105__692__165__741
0	42.0	c19-0677_20190819_01__171__583__237__641
0	42.0	c19-0677_20190819_01__456__41__520__92
0	42.0	c19-0677_20190819_01__1068__779__1129__834
0	42.0	c17-0161_20170307_01__648__504__700__548
0	42.0	c17-0161_20170307_01__175__196__300__298
0	42.0	c17-0161_20170307_01__274__23__326__69
1	42.0	c17-0161_20170307_01__408__444__451__477
0	42.0	c17-0161_20170307_01__178__811__225__848
0	42.0	c17-0161_20170307_01__1157__569__1228__635
1	42.0	c17-0161_20170307_01__1157__569__1228__635
0	42.0	c17-0452_20170717_01__450__79__507__125
0	42.0	c17-0452_20170717_01__1221__834__1268__871
0	42.0	c17-0452_20170717_01__316__527__410__607
0	42.0	c17-0452_20170717_01__372__255__429__302
0	42.0	c18-0020_20180109_01__1184__60__1268__144
0	42.0	c18-0020_20180109_01__888__184__975__273
0	42.0	c15-0597_20150714_01__921__523__1029__677
0	42.0	c15-0597_20150714_01__256__437__325__509
0	42.0	c15-0323_20150422_01__481__274__538__321
0	42.0	c15-0323_20150422_01__1049__155__1108__209
0	42.0	c19-0716_20190830_01__893__696__945__738
0	42.0	c19-0716_20190830_01__4__688__61__730
0	42.0	c19-0716_20190830_01__573__360__648__421
0	42.0	c17-0266_20170427_01__526__569__587__616
0	42.0	c17-0280_20170508_01__655__804__744__885
0	42.0	c17-0280_20170508_01__1137__32__1189__74
0	42.0	c17-0280_20170508_01__110__849__152__886
0	42.0	c17-0280_20170508_01__104__437__154__480
0	42.0	c17-0280_20170508_01__669__899__744__965
0	42.0	c17-0280_20170508_01__517__265__602__337
0	42.0	c17-0280_20170508_01__312__325__354__358
0	42.0	c18-0772_20181112_01__674__169__740__221
0	42.0	c17-0665_20170926_01__455__116__511__158
0	42.0	c17-0665_20170926_01__220__295__272__332
0	42.0	c15-1051_20151229_02__1026__388__1083__430
0	42.0	c15-1051_20151229_02__785__725__842__771
0	42.0	c15-1051_20151229_02__950__576__1000__616
0	42.0	c15-1051_20151229_02__152__141__208__188
1	42.0	c19-0284_20190424_01__138__499__190__551
0	42.0	c18-0245_20180416_01__1040__393__1111__453
0	42.0	c18-0245_20180416_01__1202__260__1264__311
0	42.0	c18-0245_20180416_01__335__764__396__818
0	42.0	c18-0245_20180416_01__852__455__914__507
0	42.0	c18-0245_20180416_01__185__490__248__541
0	42.0	c18-0610_20180907_02__730__853__777__890
1	42.0	c18-0610_20180907_02__60__465__168__586
0	42.0	c18-0610_20180907_02__980__110__1055__180
0	42.0	c16-689_20160921_01__270__226__331__268
0	42.0	c16-689_20160921_01__563__848__615__890
0	42.0	c16-689_20160921_01__907__550__961__594
0	42.0	c16-689_20160921_01__468__279__526__330
0	42.0	c16-689_20160921_01__1123__655__1184__716
0	42.0	c16-689_20160921_01__371__644__423__686
0	42.0	c16-689_20160921_01__758__614__833__684
0	42.0	c16-689_20160921_01__695__165__747__207
0	42.0	c16-689_20160921_01__362__665__414__707
0	42.0	c16-616_20160822_01__899__674__956__725
0	42.0	c16-616_20160822_01__62__426__137__494
0	42.0	c16-616_20160822_01__584__491__671__573
0	42.0	c18-0562_20180822_01__1053__239__1108__285
0	42.0	c18-0562_20180822_01__608__702__665__749
0	42.0	c18-0562_20180822_01__430__150__492__209
0	42.0	c18-0852_20181213_01__1216__23__1278__79
0	42.0	c15-0477_20150609_01__857__593__917__651
0	42.0	c15-0477_20150609_01__434__60__472__135
0	42.0	c17-0360_20170607_01__417__635__460__667
0	42.0	c15-0331_20150423_01__582__708__650__766
0	42.0	c15-0331_20150423_01__907__229__969__283
0	42.0	c18-0252_20180416_01__382__694__437__738
0	42.0	c18-0252_20180416_01__361__344__413__386
0	42.0	c18-0252_20180416_01__-1__137__56__188
0	42.0	c16-107_20160222_01__274__560__359__635
0	42.0	c15-1032_20151224_01__302__474__378__539
0	42.0	c15-1032_20151224_01__596__393__690__458
0	42.0	c15-1032_20151224_01__-5__704__51__788
0	42.0	c19-0419_20190605_01__170__288__236__349
0	42.0	c16-73_20160203_01__854__126__911__178
0	42.0	c16-73_20160203_01__949__274__1005__321
0	42.0	c16-73_20160203_01__725__448__778__492
0	42.0	c16-73_20160203_01__258__512__317__561
0	42.0	c16-73_20160203_01__373__79__435__130
0	42.0	c16-73_20160203_01__1132__547__1190__595
0	42.0	c16-73_20160203_01__1132__590__1198__644
0	42.0	c16-73_20160203_01__611__425__670__474
0	42.0	c16-73_20160203_01__632__137__712__216
0	42.0	c16-761_20161021_01__347__625__409__686
0	42.0	c18-0428_20180702_01__693__29__785__116
0	42.0	c18-0428_20180702_01__46__537__107__588
0	42.0	c18-0428_20180702_01__1075__141__1133__190
0	42.0	c18-0428_20180702_01__1008__74__1074__130
0	42.0	c18-0428_20180702_01__243__532__319__597
0	42.0	c18-0428_20180702_01__1074__267__1138__316
0	42.0	c18-0428_20180702_01__521__351__592__407
0	42.0	c18-0428_20180702_01__96__660__160__716
0	42.0	c18-0428_20180702_01__638__323__699__374
0	42.0	c16-352_20160525_02__703__762__783__832
0	42.0	c16-352_20160525_02__114__233__171__279
0	42.0	c15-0130_20150228_01__950__332__1009__386
0	42.0	c15-0130_20150228_01__1012__762__1064__804
0	42.0	c15-0130_20150228_01__990__111__1045__154
0	42.0	c15-0130_20150228_01__-5__474__33__549
0	42.0	c20-0019_20200110_01__695__251__752__302
0	42.0	c20-0019_20200110_01__182__527__243__581
0	42.0	c20-0019_20200110_01__981__778__1043__826
0	42.0	c19-0840_20191016_01__285__348__358__410
0	43.0	c16-398_20160612_01__-1__523__51__565
0	43.0	c16-398_20160612_01__27__469__79__511
0	43.0	c16-398_20160612_01__791__417__859__474
0	43.0	c15-1029_20151230_02__1113__890__1189__951
0	43.0	c19-0677_20190819_01__868__223__930__276
0	43.0	c19-0677_20190819_01__490__776__544__818
0	43.0	c19-0677_20190819_01__463__108__524__162
0	43.0	c19-0677_20190819_01__191__755__260__812
0	43.0	c19-0677_20190819_01__911__169__977__225
0	43.0	c19-0677_20190819_01__1032__569__1089__618
0	43.0	c17-0161_20170307_01__921__565__968__602
0	43.0	c17-0161_20170307_01__698__288__745__325
0	43.0	c17-0161_20170307_01__808__399__856__441
0	43.0	c17-0161_20170307_01__18__764__93__829
0	43.0	c17-0161_20170307_01__1049__887__1110__939
0	43.0	c17-0452_20170717_01__597__807__672__883
0	43.0	c17-0452_20170717_01__984__755__1036__797
0	43.0	c17-0452_20170717_01__1__596__51__631
0	43.0	c18-0020_20180109_01__201__365__272__435
0	43.0	c18-0020_20180109_01__206__269__286__339
0	43.0	c15-0323_20150422_01__486__583__538__630
0	43.0	c19-0716_20190830_01__1230__716__1287__763
0	43.0	c19-0716_20190830_01__638__330__695__377
0	43.0	c17-0266_20170427_01__1148__479__1210__532
0	43.0	c17-0280_20170508_01__273__113__345__176
1	43.0	c17-0280_20170508_01__167__647__237__707
0	43.0	c17-0280_20170508_01__110__169__174__223
0	43.0	c17-0280_20170508_01__403__174__469__235
0	43.0	c17-0280_20170508_01__568__546__657__625
0	43.0	c17-0280_20170508_01__624__279__671__311
0	43.0	c17-0280_20170508_01__1118__244__1175__291
0	43.0	c17-0280_20170508_01__1146__151__1212__211
1	43.0	c18-0772_20181112_01__698__494__772__557
0	43.0	c18-0772_20181112_01__1212__511__1278__567
0	43.0	c17-0665_20170926_01__415__103__485__168
0	43.0	c17-0665_20170926_01__1123__488__1205__553
0	43.0	c15-1051_20151229_02__602__725__656__768
0	43.0	c15-1051_20151229_02__992__819__1046__866
0	43.0	c15-1051_20151229_02__1090__217__1156__273
0	43.0	c15-1051_20151229_02__1036__336__1078__373
0	43.0	c15-1051_20151229_02__848__379__909__430
0	43.0	c15-1051_20151229_02__225__622__279__666
0	43.0	c15-1051_20151229_02__276__579__319__611
0	43.0	c15-1051_20151229_02__359__618__424__671
0	43.0	c19-0284_20190424_01__1101__678__1163__730
0	43.0	c18-0245_20180416_01__613__116__665__158
0	43.0	c18-0245_20180416_01__271__447__327__490
0	43.0	c18-0245_20180416_01__852__108__925__168
0	43.0	c18-0245_20180416_01__486__488__547__544
0	43.0	c18-0245_20180416_01__349__188__415__244
0	43.0	c15-1045_20151229_01__403__646__488__721
1	43.0	c15-1045_20151229_01__403__646__488__721
1	43.0	c18-0610_20180907_02__633__399__704__455
0	43.0	c16-689_20160921_01__1115__780__1195__852
0	43.0	c16-689_20160921_01__798__569__855__616
0	43.0	c16-689_20160921_01__415__331__460__366
0	43.0	c16-689_20160921_01__128__383__190__435
0	43.0	c16-689_20160921_01__-1__328__63__384
0	43.0	c16-616_20160822_01__913__709__960__746
0	43.0	c16-616_20160822_01__632__260__716__339
0	43.0	c16-616_20160822_01__563__631__636__698
0	43.0	c16-616_20160822_01__119__437__194__502
0	43.0	c18-0562_20180822_01__1003__239__1064__291
0	43.0	c18-0562_20180822_01__527__878__583__925
0	43.0	c18-0562_20180822_01__787__444__836__485
0	43.0	c15-1002_20151210_01__643__311__695__349
0	43.0	c15-0098_20150205_01__1036__536__1138__644
0	43.0	c15-0477_20150609_01__1079__504__1132__546
0	43.0	c15-0477_20150609_01__1151__724__1209__773
0	43.0	c18-0064_20180126_01__92__512__150__567
0	43.0	c17-0360_20170607_01__782__32__839__79
0	43.0	c18-0252_20180416_01__361__665__418__716
0	43.0	c18-0252_20180416_01__-1__844__56__886
0	43.0	c18-0252_20180416_01__549__174__601__216
0	43.0	c16-107_20160222_01__831__306__916__379
0	43.0	c15-1032_20151224_01__248__718__314__769
0	43.0	c19-0419_20190605_01__340__565__396__611
0	43.0	c17-0910_20171215_01__1118__194__1161__228
0	43.0	c16-73_20160203_01__171__32__226__76
0	43.0	c16-73_20160203_01__1072__300__1132__353
0	43.0	c16-73_20160203_01__538__83__599__135
0	43.0	c16-73_20160203_01__685__419__742__466
0	43.0	c16-73_20160203_01__55__583__112__635
0	43.0	c16-73_20160203_01__495__853__561__909
0	43.0	c16-73_20160203_01__270__698__323__745
0	43.0	c16-73_20160203_01__220__640__279__687
0	43.0	c16-73_20160203_01__166__635__213__672
0	43.0	c15-953_20151120_01__977__60__1029__102
0	43.0	c15-953_20151120_01__1165__455__1236__516
0	43.0	c15-953_20151120_01__124__224__166__256
0	43.0	c18-0428_20180702_01__719__859__792__920
0	43.0	c18-0428_20180702_01__437__574__522__649
0	43.0	c18-0428_20180702_01__597__853__652__901
0	43.0	c18-0428_20180702_01__481__302__561__372
0	43.0	c18-0428_20180702_01__447__420__513__479
0	43.0	c18-0428_20180702_01__515__411__565__455
0	43.0	c16-352_20160525_02__712__646__783__709
0	43.0	c16-352_20160525_02__1085__179__1147__230
0	43.0	c15-0130_20150228_01__568__60__629__111
0	43.0	c15-0130_20150228_01__394__338__448__380
0	43.0	c20-0019_20200110_01__1044__185__1117__249
0	43.0	c20-0019_20200110_01__657__885__735__953
0	43.0	c20-0019_20200110_01__115__883__183__946
0	43.0	c20-0019_20200110_01__950__510__1012__562
0	43.0	c19-0840_20191016_01__692__69__749__116
0	44.0	c15-802_20150928_02__312__862__392__927
0	44.0	c19-0677_20190819_01__500__109__570__169
0	44.0	c19-0677_20190819_01__84__248__147__302
0	44.0	c19-0677_20190819_01__296__857__360__913
0	44.0	c19-0677_20190819_01__1__691__63__742
0	44.0	c19-0677_20190819_01__559__426__620__482
0	44.0	c17-0161_20170307_01__208__387__276__447
0	44.0	c17-0161_20170307_01__-1__412__67__470
0	44.0	c17-0161_20170307_01__719__404__789__469
0	44.0	c17-0161_20170307_01__861__71__938__132
0	44.0	c17-0161_20170307_01__551__191__625__254
0	44.0	c17-0161_20170307_01__660__460__740__539
0	44.0	c17-0452_20170717_01__541__791__583__823
0	44.0	c17-0452_20170717_01__381__607__439__655
0	44.0	c17-0452_20170717_01__287__621__329__655
0	44.0	c18-0020_20180109_01__527__6__588__57
0	44.0	c18-0020_20180109_01__701__27__748__62
0	44.0	c18-0020_20180109_01__802__787__856__832
0	44.0	c18-0020_20180109_01__944__881__1005__937
0	44.0	c18-0020_20180109_01__518__794__600__866
0	44.0	c18-0020_20180109_01__302__752__375__813
0	44.0	c18-0020_20180109_01__1039__681__1112__765
0	44.0	c18-0020_20180109_01__281__696__356__761
0	44.0	c18-0020_20180109_01__989__295__1032__323
0	44.0	c15-0597_20150714_01__669__655__730__707
0	44.0	c15-0597_20150714_01__1062__332__1189__467
1	44.0	c17-0266_20170427_01__413__536__465__582
0	44.0	c17-0280_20170508_01__1012__261__1060__294
0	44.0	c17-0280_20170508_01__852__493__918__544
0	44.0	c17-0280_20170508_01__1193__549__1245__591
0	44.0	c17-0280_20170508_01__1132__516__1209__586
0	44.0	c17-0280_20170508_01__1160__274__1214__318
0	44.0	c17-0280_20170508_01__264__328__332__387
0	44.0	c18-0772_20181112_01__647__18__699__79
0	44.0	c18-0772_20181112_01__879__655__940__711
0	44.0	c18-0772_20181112_01__806__221__876__281
0	44.0	c18-0772_20181112_01__901__603__960__657
0	44.0	c18-0772_20181112_01__877__723__938__773
0	44.0	c17-0665_20170926_01__913__514__970__561
0	44.0	c15-1051_20151229_02__638__155__690__197
0	44.0	c15-1051_20151229_02__685__310__745__363
0	44.0	c15-1051_20151229_02__920__787__962__820
0	44.0	c18-0245_20180416_01__618__853__670__892
0	44.0	c18-0245_20180416_01__372__243__430__292
0	44.0	c18-0245_20180416_01__207__871__265__920
0	44.0	c18-0245_20180416_01__1198__338__1259__389
0	44.0	c18-0245_20180416_01__282__104__343__155
0	44.0	c15-1045_20151229_01__902__687__988__760
0	44.0	c16-689_20160921_01__882__537__944__589
1	44.0	c16-689_20160921_01__1218__219__1284__292
0	44.0	c16-689_20160921_01__1035__782__1103__843
0	44.0	c16-689_20160921_01__723__426__775__468
0	44.0	c16-689_20160921_01__1090__124__1149__175
0	44.0	c16-616_20160822_01__523__218__608__302
1	44.0	c16-616_20160822_01__1063__393__1115__432
0	44.0	c16-616_20160822_01__1056__483__1124__541
0	44.0	c16-616_20160822_01__273__545__321__582
0	44.0	c18-0562_20180822_01__568__149__625__195
0	44.0	c18-0562_20180822_01__504__218__570__274
0	44.0	c18-0562_20180822_01__980__895__1034__937
0	44.0	c18-0562_20180822_01__747__536__808__589
0	44.0	c18-0562_20180822_01__619__862__681__913
0	44.0	c15-1002_20151210_01__486__537__538__583
0	44.0	c15-1002_20151210_01__41__610__95__654
0	44.0	c15-1002_20151210_01__810__90__932__211
0	44.0	c18-0852_20181213_01__637__405__699__457
0	44.0	c18-0852_20181213_01__106__18__178__95
0	44.0	c18-0064_20180126_01__-1__778__61__829
0	44.0	c17-0360_20170607_01__706__279__772__335
0	44.0	c18-0252_20180416_01__520__320__572__362
0	44.0	c18-0252_20180416_01__1067__104__1119__151
0	44.0	c18-0252_20180416_01__138__821__199__872
0	44.0	c15-1032_20151224_01__1127__65__1212__144
0	44.0	c19-0419_20190605_01__298__519__350__561
0	44.0	c16-73_20160203_01__703__351__778__421
0	44.0	c16-73_20160203_01__968__291__1025__338
0	44.0	c16-73_20160203_01__451__615__510__666
0	44.0	c16-73_20160203_01__458__265__508__307
0	44.0	c16-73_20160203_01__637__674__698__725
0	44.0	c16-73_20160203_01__409__385__470__437
0	44.0	c15-953_20151120_01__1073__179__1134__244
0	44.0	c15-953_20151120_01__981__97__1047__153
0	44.0	c15-953_20151120_01__785__13__849__69
0	44.0	c15-953_20151120_01__1109__123__1147__151
1	44.0	c18-0764_20181107_02__555__374__613__425
0	44.0	c18-0602_20180907_02__147__155__208__211
0	44.0	c18-0428_20180702_01__612__228__675__280
0	44.0	c18-0428_20180702_01__1039__160__1107__220
0	44.0	c18-0428_20180702_01__1132__217__1191__268
0	44.0	c18-0428_20180702_01__621__512__692__575
0	44.0	c18-0428_20180702_01__850__524__904__573
0	44.0	c16-352_20160525_02__1085__771__1156__832
0	44.0	c15-0130_20150228_01__815__665__904__744
0	44.0	c15-0130_20150228_01__641__848__707__909
0	44.0	c15-0130_20150228_01__894__415__946__459
0	44.0	c20-0019_20200110_01__142__569__199__621
0	44.0	c20-0019_20200110_01__1129__605__1194__661
0	44.0	c20-0019_20200110_01__968__242__1035__299
0	44.0	c20-0019_20200110_01__1121__243__1180__293
0	45.0	c15-725_20150827_02__683__630__754__691
0	45.0	c16-398_20160612_01__4__665__75__721
0	45.0	c16-398_20160612_01__948__437__1011__492
0	45.0	c15-635_20150722_01__147__383__213__439
0	45.0	c19-0677_20190819_01__186__155__263__223
0	45.0	c19-0677_20190819_01__316__79__387__139
0	45.0	c19-0677_20190819_01__473__246__530__295
0	45.0	c17-0161_20170307_01__737__665__813__735
0	45.0	c17-0161_20170307_01__674__346__740__402
1	45.0	c17-0161_20170307_01__604__913__652__953
0	45.0	c17-0161_20170307_01__647__388__690__425
0	45.0	c17-0161_20170307_01__848__594__923__654
0	45.0	c17-0161_20170307_01__765__423__822__474
0	45.0	c17-0452_20170717_01__260__135__312__172
1	45.0	c17-0452_20170717_01__1104__321__1156__363
0	45.0	c17-0452_20170717_01__65__416__112__453
0	45.0	c17-0452_20170717_01__731__588__778__625
0	45.0	c17-0452_20170717_01__288__514__340__559
0	45.0	c18-0020_20180109_01__751__139__817__195
0	45.0	c18-0020_20180109_01__730__721__772__753
0	45.0	c18-0020_20180109_01__638__228__684__271
1	45.0	c18-0020_20180109_01__876__221__946__286
1	45.0	c18-0020_20180109_01__1113__765__1187__827
1	45.0	c18-0020_20180109_01__890__853__951__909
1	45.0	c18-0020_20180109_01__65__512__137__580
1	45.0	c18-0020_20180109_01__1071__759__1147__827
1	45.0	c18-0020_20180109_01__728__895__808__951
0	45.0	c15-0597_20150714_01__187__227__309__349
0	45.0	c15-0323_20150422_01__1212__507__1278__567
1	45.0	c15-0323_20150422_01__1085__465__1151__516
1	45.0	c19-0716_20190830_01__131__754__204__819
0	45.0	c17-0266_20170427_01__838__523__904__579
1	45.0	c17-0280_20170508_01__-3__228__65__289
1	45.0	c17-0280_20170508_01__624__712__686__766
1	45.0	c17-0280_20170508_01__718__808__824__911
1	45.0	c17-0280_20170508_01__133__252__196__301
1	45.0	c17-0280_20170508_01__111__392__176__450
0	45.0	c17-0280_20170508_01__121__349__170__393
0	45.0	c15-1051_20151229_02__935__450__987__492
0	45.0	c15-1051_20151229_02__862__-5__918__41
0	45.0	c15-1051_20151229_02__534__750__583__785
1	45.0	c19-0284_20190424_01__1151__853__1217__909
0	45.0	c18-0245_20180416_01__365__112__434__168
1	45.0	c18-0610_20180907_02__623__346__689__398
0	45.0	c18-0610_20180907_02__431__862__511__937
0	45.0	c16-689_20160921_01__337__256__386__295
0	45.0	c18-0562_20180822_01__1132__206__1187__252
0	45.0	c18-0562_20180822_01__483__200__540__247
0	45.0	c18-0562_20180822_01__617__111__698__171
0	45.0	c18-0562_20180822_01__619__525__671__567
0	45.0	c18-0562_20180822_01__573__316__625__358
1	45.0	c18-0852_20181213_01__872__255__980__407
0	45.0	c15-0477_20150609_01__669__379__744__444
0	45.0	c15-0477_20150609_01__1095__843__1193__927
0	45.0	c18-0064_20180126_01__542__314__589__352
0	45.0	c17-0360_20170607_01__671__319__737__378
0	45.0	c17-0360_20170607_01__1151__447__1193__480
0	45.0	c17-0360_20170607_01__952__523__1011__571
0	45.0	c17-0360_20170607_01__87__565__136__602
1	45.0	c15-0331_20150423_01__698__39__773__104
0	45.0	c18-0252_20180416_01__458__233__510__273
0	45.0	c18-0252_20180416_01__110__460__176__518
0	45.0	c18-0252_20180416_01__1031__853__1083__895
1	45.0	c15-1032_20151224_01__694__208__780__282
0	45.0	c15-1032_20151224_01__1049__657__1164__772
0	45.0	c15-0257_20150407_02__1193__857__1259__913
0	45.0	c19-0419_20190605_01__678__197__730__239
0	45.0	c16-73_20160203_01__970__65__1027__111
0	45.0	c16-73_20160203_01__702__103__754__145
0	45.0	c15-0297_20150414_01__495__241__622__363
0	45.0	c18-0602_20180907_02__1095__529__1193__621
1	45.0	c18-0428_20180702_01__935__136__996__187
0	45.0	c18-0428_20180702_01__298__797__373__862
1	45.0	c18-0428_20180702_01__614__646__687__704
0	45.0	c18-0428_20180702_01__413__528__479__584
0	45.0	c18-0428_20180702_01__472__499__528__546
0	45.0	c16-352_20160525_02__108__890__164__937
0	45.0	c15-0130_20150228_01__68__676__151__753
0	45.0	c15-0130_20150228_01__756__65__808__107
0	45.0	c15-0130_20150228_01__790__365__847__411
0	45.0	c20-0019_20200110_01__-1__626__81__694
0	45.0	c20-0019_20200110_01__375__857__432__904
0	45.0	c18-0500_20180726_01__1202__555__1268__607
0	45.0	c18-0500_20180726_01__261__601__321__653
0	45.0	c19-0840_20191016_01__117__688__176__737
1	45.0	c19-0840_20191016_01__792__376__856__437
1	46.0	c16-398_20160612_01__568__500__634__556
0	46.0	c15-1029_20151230_02__1046__51__1105__102
0	46.0	c19-0677_20190819_01__-1__79__51__121
0	46.0	c17-0161_20170307_01__735__74__783__116
0	46.0	c17-0161_20170307_01__788__88__859__151
1	46.0	c17-0161_20170307_01__453__483__496__516
0	46.0	c17-0161_20170307_01__1218__614__1261__642
0	46.0	c17-0161_20170307_01__179__662__228__709
0	46.0	c17-0161_20170307_01__321__885__364__918
0	46.0	c17-0161_20170307_01__346__842__395__883
0	46.0	c17-0161_20170307_01__894__619__952__670
1	46.0	c17-0452_20170717_01__1043__174__1100__221
1	46.0	c17-0452_20170717_01__695__890__747__932
1	46.0	c18-0020_20180109_01__363__698__427__761
0	46.0	c18-0020_20180109_01__359__387__436__452
1	46.0	c18-0020_20180109_01__1047__827__1108__885
1	46.0	c18-0020_20180109_01__517__104__565__148
1	46.0	c18-0020_20180109_01__589__640__650__692
1	46.0	c18-0020_20180109_01__1156__107__1250__172
0	46.0	c15-0597_20150714_01__1116__448__1177__499
1	46.0	c15-0323_20150422_01__1063__883__1119__929
0	46.0	c15-0323_20150422_01__156__876__222__937
0	46.0	c17-0280_20170508_01__806__299__851__334
0	46.0	c17-0280_20170508_01__911__488__975__542
1	46.0	c17-0280_20170508_01__142__37__222__111
1	46.0	c17-0280_20170508_01__1101__181__1154__227
1	46.0	c17-0280_20170508_01__709__32__775__88
1	46.0	c17-0280_20170508_01__1123__721__1194__781
0	46.0	c17-0665_20170926_01__1115__285__1177__337
0	46.0	c15-1051_20151229_02__669__646__726__697
0	46.0	c15-1051_20151229_02__1151__806__1217__862
0	46.0	c15-1051_20151229_02__780__859__842__913
0	46.0	c15-1051_20151229_02__500__815__561__871
1	46.0	c19-0284_20190424_01__1058__496__1139__568
0	46.0	c18-0245_20180416_01__270__605__332__659
0	46.0	c18-0245_20180416_01__220__341__291__411
0	46.0	c18-0245_20180416_01__1193__60__1250__107
0	46.0	c18-0245_20180416_01__1198__451__1250__493
0	46.0	c18-0610_20180907_02__911__427__977__483
0	46.0	c18-0610_20180907_02__456__383__517__435
0	46.0	c16-689_20160921_01__563__-5__625__46
0	46.0	c16-689_20160921_01__478__665__530__725
1	46.0	c16-689_20160921_01__389__434__438__475
0	46.0	c16-689_20160921_01__788__-5__844__34
0	46.0	c16-689_20160921_01__263__510__306__542
0	46.0	c16-689_20160921_01__700__361__743__392
0	46.0	c16-689_20160921_01__1070__759__1134__818
1	46.0	c16-689_20160921_01__255__594__313__642
0	46.0	c16-616_20160822_01__767__447__836__503
0	46.0	c16-616_20160822_01__989__598__1071__678
0	46.0	c18-0562_20180822_01__556__731__631__796
0	46.0	c18-0562_20180822_01__1193__354__1240__396
0	46.0	c15-1002_20151210_01__530__591__593__651
0	46.0	c15-0477_20150609_01__602__770__656__818
0	46.0	c18-0064_20180126_01__321__788__378__839
0	46.0	c17-0360_20170607_01__248__346__300__393
0	46.0	c17-0360_20170607_01__371__297__423__337
0	46.0	c17-0360_20170607_01__387__254__438__295
0	46.0	c18-0252_20180416_01__756__423__836__497
0	46.0	c16-107_20160222_01__747__525__817__586
0	46.0	c15-1032_20151224_01__259__604__338__671
0	46.0	c19-0419_20190605_01__724__179__781__221
0	46.0	c16-73_20160203_01__662__806__746__876
0	46.0	c16-73_20160203_01__188__640__240__682
0	46.0	c16-73_20160203_01__442__444__503__493
0	46.0	c16-73_20160203_01__907__183__991__253
0	46.0	c16-73_20160203_01__1026__174__1092__225
0	46.0	c16-73_20160203_01__4__333__67__382
0	46.0	c15-953_20151120_01__821__92__875__139
0	46.0	c18-0428_20180702_01__1008__316__1077__382
0	46.0	c18-0428_20180702_01__916__512__973__559
0	46.0	c16-352_20160525_02__687__467__748__518
1	46.0	c15-0130_20150228_01__790__613__859__671
0	46.0	c15-0130_20150228_01__469__245__520__284
0	46.0	c20-0019_20200110_01__728__653__801__724
0	46.0	c18-0500_20180726_01__729__23__781__65
1	46.0	c19-0840_20191016_01__646__498__698__541
0	46.0	c19-0840_20191016_01__559__4__629__65
0	47.0	c15-0510_20150615_01__714__773__775__825
0	47.0	c15-635_20150722_01__234__265__281__302
0	47.0	c19-0677_20190819_01__729__381__795__439
0	47.0	c19-0677_20190819_01__548__395__604__439
0	47.0	c19-0677_20190819_01__239__885__309__946
0	47.0	c19-0677_20190819_01__616__35__674__88
0	47.0	c17-0161_20170307_01__1202__388__1250__425
0	47.0	c17-0161_20170307_01__719__264__759__292
0	47.0	c17-0161_20170307_01__1207__579__1250__611
0	47.0	c17-0161_20170307_01__524__246__577__293
0	47.0	c17-0161_20170307_01__80__413__141__463
1	47.0	c17-0452_20170717_01__185__757__234__788
1	47.0	c17-0452_20170717_01__566__698__613__734
1	47.0	c17-0452_20170717_01__971__837__1018__876
1	47.0	c17-0452_20170717_01__1202__707__1250__744
1	47.0	c18-0020_20180109_01__801__227__867__288
1	47.0	c18-0020_20180109_01__199__446__272__507
0	47.0	c18-0020_20180109_01__47__425__136__499
1	47.0	c18-0020_20180109_01__348__491__397__531
0	47.0	c19-0716_20190830_01__544__298__594__336
0	47.0	c17-0266_20170427_01__452__242__513__295
1	47.0	c17-0280_20170508_01__396__834__467__897
1	47.0	c17-0280_20170508_01__848__60__932__139
1	47.0	c17-0280_20170508_01__263__867__343__932
1	47.0	c17-0280_20170508_01__829__555__876__597
0	47.0	c18-0772_20181112_01__962__574__1014__616
1	47.0	c18-0772_20181112_01__636__579__726__644
0	47.0	c17-0665_20170926_01__778__707__842__763
0	47.0	c17-0665_20170926_01__556__198__612__252
1	47.0	c17-0665_20170926_01__173__274__221__311
1	47.0	c15-1051_20151229_02__973__666__1036__718
0	47.0	c18-0245_20180416_01__1076__269__1147__330
0	47.0	c18-0245_20180416_01__1221__622__1278__666
0	47.0	c18-0245_20180416_01__852__532__970__635
0	47.0	c18-0610_20180907_02__713__233__778__287
0	47.0	c16-689_20160921_01__816__551__872__599
0	47.0	c16-689_20160921_01__31__793__102__857
0	47.0	c16-689_20160921_01__440__909__496__955
0	47.0	c16-689_20160921_01__582__379__634__416
0	47.0	c16-689_20160921_01__852__430__914__481
0	47.0	c16-689_20160921_01__1193__410__1259__470
0	47.0	c18-0562_20180822_01__591__525__639__572
1	47.0	c18-0562_20180822_01__1104__797__1156__841
0	47.0	c18-0562_20180822_01__362__574__416__618
0	47.0	c18-0562_20180822_01__897__204__963__260
0	47.0	c15-1002_20151210_01__129__911__178__951
0	47.0	c15-0477_20150609_01__1039__199__1109__266
0	47.0	c15-0477_20150609_01__389__218__460__293
0	47.0	c18-0064_20180126_01__993__510__1051__560
0	47.0	c18-0064_20180126_01__1179__382__1273__471
0	47.0	c17-0360_20170607_01__99__418__182__487
0	47.0	c17-0360_20170607_01__809__718__870__772
0	47.0	c17-0360_20170607_01__691__423__742__462
1	47.0	c15-0257_20150407_02__440__274__515__335
0	47.0	c16-73_20160203_01__601__641__676__716
0	47.0	c16-73_20160203_01__294__131__347__174
0	47.0	c15-953_20151120_01__970__250__1010__280
1	47.0	c15-953_20151120_01__967__597__1033__653
1	47.0	c15-953_20151120_01__57__391__126__452
0	47.0	c18-0428_20180702_01__276__620__349__681
1	47.0	c18-0428_20180702_01__536__285__596__335
0	47.0	c18-0428_20180702_01__691__376__750__425
0	47.0	c18-0428_20180702_01__125__649__177__695
1	47.0	c18-0428_20180702_01__1067__303__1131__355
0	47.0	c15-0130_20150228_01__949__712__1020__777
1	47.0	c15-0130_20150228_01__1114__456__1171__501
0	47.0	c15-0130_20150228_01__1057__194__1124__245
1	47.0	c20-0019_20200110_01__454__897__515__951
0	47.0	c20-0019_20200110_01__591__759__662__815
0	47.0	c20-0019_20200110_01__1035__512__1099__567
0	47.0	c20-0019_20200110_01__533__41__597__95
0	47.0	c19-0840_20191016_01__1109__841__1198__913
1	47.0	c19-0840_20191016_01__716__55__768__97
0	48.0	c15-635_20150722_01__747__339__788__369
0	48.0	c19-0677_20190819_01__292__352__348__395
0	48.0	c19-0677_20190819_01__312__397__373__439
1	48.0	c17-0161_20170307_01__539__515__612__582
0	48.0	c17-0161_20170307_01__65__37__121__83
1	48.0	c17-0161_20170307_01__440__174__515__239
0	48.0	c17-0161_20170307_01__570__369__612__402
0	48.0	c17-0161_20170307_01__577__753__632__801
0	48.0	c17-0161_20170307_01__243__146__286__179
0	48.0	c17-0161_20170307_01__684__647__738__690
1	48.0	c17-0452_20170717_01__660__32__702__60
0	48.0	c17-0452_20170717_01__350__448__409__502
1	48.0	c17-0452_20170717_01__234__-1__286__41
0	48.0	c17-0452_20170717_01__110__285__162__327
1	48.0	c17-0452_20170717_01__1104__646__1156__688
0	48.0	c18-0020_20180109_01__904__360__951__407
1	48.0	c18-0020_20180109_01__537__718__603__775
0	48.0	c17-0266_20170427_01__389__885__437__923
0	48.0	c17-0266_20170427_01__1200__391__1264__447
0	48.0	c17-0280_20170508_01__788__281__835__320
0	48.0	c17-0280_20170508_01__921__632__1001__707
1	48.0	c17-0280_20170508_01__138__862__199__918
0	48.0	c17-0280_20170508_01__693__246__769__313
1	48.0	c17-0280_20170508_01__714__193__831__286
0	48.0	c17-0280_20170508_01__655__445__707__489
0	48.0	c18-0772_20181112_01__939__649__996__695
0	48.0	c18-0772_20181112_01__907__645__968__696
0	48.0	c15-1051_20151229_02__55__111__103__149
0	48.0	c18-0245_20180416_01__41__488__98__535
0	48.0	c18-0245_20180416_01__587__890__643__937
0	48.0	c18-0245_20180416_01__1216__740__1270__789
0	48.0	c16-689_20160921_01__307__321__364__363
1	48.0	c16-689_20160921_01__1072__165__1133__218
0	48.0	c16-689_20160921_01__705__876__766__927
0	48.0	c16-689_20160921_01__509__844__573__895
0	48.0	c16-689_20160921_01__336__798__396__852
0	48.0	c16-689_20160921_01__413__857__483__923
0	48.0	c16-689_20160921_01__591__431__634__464
1	48.0	c16-616_20160822_01__709__322__796__399
0	48.0	c16-616_20160822_01__676__766__772__864
0	48.0	c18-0562_20180822_01__633__204__690__255
0	48.0	c18-0562_20180822_01__544__765__605__817
1	48.0	c15-0098_20150205_01__1176__608__1245__661
0	48.0	c15-1014_20151215_01__481__288__533__330
0	48.0	c15-1014_20151215_01__693__129__750__177
0	48.0	c17-0360_20170607_01__258__251__329__316
0	48.0	c17-0360_20170607_01__813__198__875__253
0	48.0	c15-0331_20150423_01__1193__4__1264__65
0	48.0	c18-0252_20180416_01__457__392__519__451
1	48.0	c15-0257_20150407_02__529__293__603__368
0	48.0	c19-0843_20191017_01__829__-1__909__65
0	48.0	c17-0910_20171215_01__647__696__704__746
0	48.0	c16-73_20160203_01__1110__296__1171__345
0	48.0	c16-73_20160203_01__669__479__749__549
0	48.0	c16-73_20160203_01__751__197__813__244
0	48.0	c16-73_20160203_01__277__848__327__890
0	48.0	c16-73_20160203_01__353__655__421__713
0	48.0	c16-73_20160203_01__862__819__921__870
0	48.0	c16-761_20161021_01__552__690__623__751
0	48.0	c18-0428_20180702_01__803__347__856__390
0	48.0	c18-0428_20180702_01__77__576__151__655
0	48.0	c18-0428_20180702_01__18__762__79__818
0	48.0	c15-0130_20150228_01__634__37__686__79
0	48.0	c15-0130_20150228_01__930__742__984__792
1	48.0	c20-0019_20200110_01__602__481__682__555
0	49.0	c16-398_20160612_01__1049__779__1121__844
1	49.0	c15-635_20150722_01__893__153__976__230
0	49.0	c19-0677_20190819_01__1198__783__1259__834
0	49.0	c19-0677_20190819_01__1162__6__1223__62
1	49.0	c17-0161_20170307_01__810__311__872__363
0	49.0	c17-0161_20170307_01__124__141__199__202
0	49.0	c17-0161_20170307_01__577__231__639__287
0	49.0	c17-0452_20170717_01__984__235__1036__277
1	49.0	c17-0452_20170717_01__1165__333__1217__375
1	49.0	c17-0452_20170717_01__152__871__204__923
0	49.0	c17-0452_20170717_01__243__239__300__286
0	49.0	c17-0452_20170717_01__986__642__1031__682
1	49.0	c17-0452_20170717_01__1174__169__1231__221
0	49.0	c18-0020_20180109_01__417__404__488__465
1	49.0	c18-0020_20180109_01__27__804__84__855
1	49.0	c18-0020_20180109_01__671__619__730__673
1	49.0	c18-0020_20180109_01__1040__791__1103__849
1	49.0	c18-0020_20180109_01__20__310__98__380
1	49.0	c18-0020_20180109_01__515__43__576__95
1	49.0	c15-0323_20150422_01__1067__176__1126__225
0	49.0	c17-0266_20170427_01__123__500__181__550
0	49.0	c17-0266_20170427_01__916__308__977__359
1	49.0	c17-0280_20170508_01__422__391__478__447
1	49.0	c17-0280_20170508_01__809__103__875__168
1	49.0	c17-0280_20170508_01__1017__317__1074__368
1	49.0	c17-0280_20170508_01__781__53__865__123
0	49.0	c17-0280_20170508_01__374__342__434__396
1	49.0	c17-0280_20170508_01__1053__768__1126__838
1	49.0	c17-0280_20170508_01__380__871__446__932
0	49.0	c17-0280_20170508_01__523__550__576__594
1	49.0	c17-0280_20170508_01__664__650__728__703
1	49.0	c18-0772_20181112_01__278__425__353__489
0	49.0	c18-0772_20181112_01__1099__441__1195__555
0	49.0	c17-0665_20170926_01__910__738__965__787
0	49.0	c18-0245_20180416_01__1160__669__1240__758
0	49.0	c18-0245_20180416_01__715__267__776__318
0	49.0	c18-0245_20180416_01__1230__283__1287__330
0	49.0	c18-0245_20180416_01__604__420__671__485
0	49.0	c15-1045_20151229_01__9__37__75__88
0	49.0	c18-0610_20180907_02__79__698__157__775
0	49.0	c16-689_20160921_01__614__352__666__390
0	49.0	c16-689_20160921_01__747__536__799__575
0	49.0	c16-689_20160921_01__-3__128__47__168
0	49.0	c16-689_20160921_01__697__610__757__660
1	49.0	c16-616_20160822_01__819__248__923__353
0	49.0	c16-616_20160822_01__126__298__224__384
0	49.0	c16-616_20160822_01__403__155__479__225
0	49.0	c16-616_20160822_01__120__515__173__558
0	49.0	c16-616_20160822_01__348__176__423__246
1	49.0	c16-616_20160822_01__-10__674__47__763
1	49.0	c16-616_20160822_01__714__562__806__653
1	49.0	c16-616_20160822_01__983__767__1061__840
0	49.0	c16-616_20160822_01__326__579__410__653
1	49.0	c18-0562_20180822_01__277__465__357__537
1	49.0	c18-0562_20180822_01__1094__255__1139__291
0	49.0	c18-0562_20180822_01__1086__533__1136__574
0	49.0	c15-0477_20150609_01__695__843__756__896
0	49.0	c17-0360_20170607_01__547__541__608__590
0	49.0	c15-1032_20151224_01__201__593__291__677
0	49.0	c15-1032_20151224_01__51__686__140__759
1	49.0	c15-0257_20150407_02__435__292__523__374
0	49.0	c16-73_20160203_01__710__43__773__97
0	49.0	c15-953_20151120_01__207__462__252__499
0	49.0	c15-953_20151120_01__1165__123__1212__155
0	49.0	c16-761_20161021_01__577__665__639__721
1	49.0	c16-761_20161021_01__1106__39__1170__93
0	49.0	c18-0428_20180702_01__341__462__407__518
0	49.0	c18-0428_20180702_01__275__764__327__807
0	49.0	c16-352_20160525_02__776__712__832__760
0	49.0	c16-352_20160525_02__229__632__351__786
0	49.0	c15-0130_20150228_01__1058__307__1125__361
0	49.0	c20-0019_20200110_01__185__426__260__498
0	49.0	c20-0019_20200110_01__55__631__117__684
0	49.0	c20-0019_20200110_01__345__65__402__107
1	50.0	c15-635_20150722_01__187__669__249__730
0	50.0	c19-0677_20190819_01__376__74__437__125
1	50.0	c17-0161_20170307_01__660__233__726__289
1	50.0	c17-0161_20170307_01__492__216__550__267
0	50.0	c17-0161_20170307_01__340__918__387__946
0	50.0	c17-0161_20170307_01__65__751__131__802
1	50.0	c17-0452_20170717_01__899__99__951__137
0	50.0	c17-0452_20170717_01__705__533__746__561
1	50.0	c17-0452_20170717_01__83__885__135__932
0	50.0	c17-0452_20170717_01__481__551__547__602
1	50.0	c17-0452_20170717_01__536__815__588__857
0	50.0	c18-0020_20180109_01__1137__283__1175__316
0	50.0	c18-0020_20180109_01__565__96__650__171
1	50.0	c18-0020_20180109_01__811__101__882__171
1	50.0	c18-0020_20180109_01__57__645__112__694
1	50.0	c18-0020_20180109_01__276__69__333__116
1	50.0	c15-0323_20150422_01__366__560__437__621
0	50.0	c17-0280_20170508_01__267__909__314__951
0	50.0	c17-0280_20170508_01__809__239__863__287
1	50.0	c17-0280_20170508_01__712__285__792__374
1	50.0	c17-0280_20170508_01__944__742__1007__789
1	50.0	c17-0280_20170508_01__276__558__333__610
1	50.0	c17-0280_20170508_01__800__595__864__657
1	50.0	c17-0280_20170508_01__98__565__174__632
1	50.0	c17-0280_20170508_01__1111__104__1161__143
0	50.0	c17-0665_20170926_01__328__526__384__570
0	50.0	c15-1051_20151229_02__486__665__542__711
0	50.0	c15-1045_20151229_01__968__69__1030__121
0	50.0	c18-0610_20180907_02__916__508__998__587
0	50.0	c18-0610_20180907_02__961__393__1051__470
0	50.0	c16-689_20160921_01__632__403__685__446
1	50.0	c16-689_20160921_01__1034__137__1096__189
1	50.0	c16-616_20160822_01__469__587__559__666
1	50.0	c16-616_20160822_01__443__136__521__202
0	50.0	c18-0562_20180822_01__279__843__336__890
0	50.0	c15-1002_20151210_01__669__474__721__516
0	50.0	c18-0064_20180126_01__733__644__789__691
0	50.0	c17-0360_20170607_01__608__512__673__569
0	50.0	c15-0331_20150423_01__369__328__435__388
0	50.0	c18-0252_20180416_01__637__431__706__491
1	50.0	c15-0257_20150407_02__502__464__576__539
1	50.0	c19-0419_20190605_01__650__347__716__408
0	50.0	c15-953_20151120_01__192__453__235__486
0	50.0	c15-953_20151120_01__4__145__49__180
0	50.0	c15-953_20151120_01__606__-1__649__34
0	50.0	c15-953_20151120_01__203__394__253__436
0	50.0	c15-953_20151120_01__281__608__330__647
0	50.0	c15-953_20151120_01__1193__369__1240__407
0	50.0	c16-761_20161021_01__80__13__139__62
0	50.0	c18-0428_20180702_01__582__103__655__168
0	50.0	c15-0130_20150228_01__234__731__293__780
0	50.0	c20-0019_20200110_01__582__655__643__711
0	50.0	c20-0019_20200110_01__-5__825__51__871
0	50.0	c20-0019_20200110_01__925__9__1001__74
1	50.0	c20-0019_20200110_01__337__93__403__150
0	50.0	c19-0840_20191016_01__65__700__140__761
0	51.0	c15-635_20150722_01__518__91__578__140
0	51.0	c19-0677_20190819_01__271__111__338__170
0	51.0	c19-0677_20190819_01__602__360__666__416
1	51.0	c17-0161_20170307_01__589__308__657__368
0	51.0	c17-0161_20170307_01__263__881__308__915
1	51.0	c17-0161_20170307_01__500__488__552__530
0	51.0	c17-0161_20170307_01__726__293__786__339
0	51.0	c17-0161_20170307_01__382__771__530__883
1	51.0	c17-0161_20170307_01__605__208__662__253
1	51.0	c17-0452_20170717_01__41__51__93__93
1	51.0	c17-0452_20170717_01__403__530__455__572
1	51.0	c17-0452_20170717_01__131__653__177__692
1	51.0	c17-0452_20170717_01__369__399__425__446
1	51.0	c17-0452_20170717_01__1174__583__1221__625
0	51.0	c18-0020_20180109_01__712__494__779__561
1	51.0	c18-0020_20180109_01__357__560__413__616
1	51.0	c18-0020_20180109_01__211__488__291__563
1	51.0	c18-0020_20180109_01__604__546__694__660
1	51.0	c18-0020_20180109_01__241__214__311__275
1	51.0	c18-0020_20180109_01__885__104__946__160
0	51.0	c16-578_20160804_01__1048__632__1114__688
1	51.0	c17-0280_20170508_01__826__199__892__261
1	51.0	c17-0280_20170508_01__256__829__313__878
1	51.0	c17-0280_20170508_01__1003__-5__1055__27
1	51.0	c17-0280_20170508_01__712__74__776__125
0	51.0	c17-0280_20170508_01__574__725__612__758
1	51.0	c17-0280_20170508_01__748__762__794__799
1	51.0	c17-0280_20170508_01__1146__557__1228__632
1	51.0	c17-0280_20170508_01__1219__603__1282__659
1	51.0	c17-0280_20170508_01__-5__646__61__711
1	51.0	c17-0280_20170508_01__495__909__566__969
1	51.0	c17-0280_20170508_01__912__106__969__155
1	51.0	c17-0280_20170508_01__1232__626__1284__676
1	51.0	c17-0280_20170508_01__417__412__507__496
1	51.0	c18-0772_20181112_01__1149__611__1215__667
0	51.0	c18-0245_20180416_01__607__720__657__757
0	51.0	c18-0245_20180416_01__408__588__465__635
0	51.0	c18-0245_20180416_01__1069__160__1147__225
0	51.0	c18-0245_20180416_01__1104__460__1170__516
0	51.0	c18-0245_20180416_01__589__540__645__587
0	51.0	c18-0245_20180416_01__543__843__593__885
0	51.0	c15-1045_20151229_01__1003__524__1060__570
1	51.0	c18-0610_20180907_02__434__274__496__339
0	51.0	c18-0610_20180907_02__797__69__883__158
0	51.0	c16-689_20160921_01__1046__169__1093__209
0	51.0	c16-689_20160921_01__698__294__753__338
0	51.0	c16-689_20160921_01__-1__238__67__298
0	51.0	c16-689_20160921_01__271__329__337__385
0	51.0	c16-689_20160921_01__573__408__622__447
0	51.0	c16-689_20160921_01__1130__143__1173__176
0	51.0	c16-689_20160921_01__536__465__597__516
0	51.0	c16-689_20160921_01__730__355__772__388
0	51.0	c16-689_20160921_01__733__551__784__596
0	51.0	c16-689_20160921_01__775__495__831__541
0	51.0	c16-689_20160921_01__591__688__643__735
0	51.0	c16-689_20160921_01__977__547__1031__592
0	51.0	c16-689_20160921_01__545__895__602__943
0	51.0	c16-616_20160822_01__385__514__471__594
0	51.0	c16-616_20160822_01__852__741__946__830
1	51.0	c16-616_20160822_01__561__80__665__172
1	51.0	c16-616_20160822_01__458__767__538__837
0	51.0	c16-616_20160822_01__345__488__435__574
0	51.0	c18-0562_20180822_01__1179__236__1226__273
0	51.0	c15-0477_20150609_01__1191__398__1259__457
0	51.0	c18-0064_20180126_01__790__453__856__511
0	51.0	c17-0360_20170607_01__925__414__989__473
1	51.0	c15-0257_20150407_02__991__628__1066__699
0	51.0	c16-73_20160203_01__-3__112__53__159
0	51.0	c15-953_20151120_01__811__291__869__339
0	51.0	c15-953_20151120_01__296__383__341__421
0	51.0	c16-761_20161021_01__341__660__405__721
1	51.0	c18-0428_20180702_01__637__676__705__737
0	51.0	c18-0428_20180702_01__9__555__65__602
0	51.0	c20-0019_20200110_01__243__494__311__552
1	51.0	c20-0019_20200110_01__985__314__1043__364
0	52.0	c15-635_20150722_01__743__650__787__688
0	52.0	c19-0677_20190819_01__431__778__488__825
0	52.0	c19-0677_20190819_01__973__190__1039__248
0	52.0	c17-0161_20170307_01__698__369__757__418
0	52.0	c17-0161_20170307_01__-1__617__44__652
0	52.0	c17-0161_20170307_01__1158__252__1207__292
0	52.0	c17-0161_20170307_01__1146__51__1214__111
1	52.0	c17-0161_20170307_01__234__669__291__721
0	52.0	c17-0452_20170717_01__288__745__350__797
0	52.0	c17-0452_20170717_01__895__773__933__806
1	52.0	c17-0452_20170717_01__776__864__837__915
1	52.0	c17-0452_20170717_01__91__716__143__763
1	52.0	c17-0452_20170717_01__55__137__98__169
0	52.0	c17-0452_20170717_01__497__468__544__498
1	52.0	c18-0020_20180109_01__254__310__339__384
1	52.0	c15-0323_20150422_01__1107__840__1175__897
1	52.0	c15-0323_20150422_01__1132__427__1194__482
0	52.0	c17-0266_20170427_01__889__436__948__485
0	52.0	c17-0280_20170508_01__788__198__845__247
1	52.0	c17-0280_20170508_01__647__199__708__246
1	52.0	c17-0280_20170508_01__309__288__351__325
1	52.0	c17-0280_20170508_01__1212__146__1292__221
1	52.0	c17-0280_20170508_01__245__196__297__238
1	52.0	c17-0280_20170508_01__18__712__63__750
1	52.0	c17-0280_20170508_01__1153__811__1227__881
1	52.0	c17-0280_20170508_01__-5__74__37__116
0	52.0	c17-0280_20170508_01__9__518__51__551
1	52.0	c17-0280_20170508_01__611__581__682__646
1	52.0	c17-0280_20170508_01__660__388__726__449
1	52.0	c17-0280_20170508_01__950__574__1027__641
0	52.0	c18-0772_20181112_01__533__232__594__281
1	52.0	c18-0772_20181112_01__307__474__368__525
0	52.0	c19-0284_20190424_01__769__394__840__453
0	52.0	c18-0245_20180416_01__749__94__803__135
0	52.0	c18-0245_20180416_01__23__255__84__307
0	52.0	c18-0245_20180416_01__57__708__144__782
0	52.0	c18-0245_20180416_01__1228__708__1284__770
0	52.0	c18-0245_20180416_01__152__797__218__853
1	52.0	c18-0610_20180907_02__962__465__1032__527
0	52.0	c16-689_20160921_01__749__317__810__368
0	52.0	c16-689_20160921_01__1014__710__1076__761
1	52.0	c16-616_20160822_01__815__360__914__449
0	52.0	c18-0562_20180822_01__1204__231__1256__278
0	52.0	c18-0562_20180822_01__375__331__424__373
1	52.0	c18-0562_20180822_01__468__829__532__886
0	52.0	c17-0360_20170607_01__355__315__428__382
0	52.0	c15-1032_20151224_01__380__618__525__777
1	52.0	c15-0257_20150407_02__437__418__531__502
1	52.0	c15-953_20151120_01__820__334__866__371
0	52.0	c15-953_20151120_01__516__246__569__289
0	52.0	c18-0764_20181107_02__1000__300__1085__382
1	52.0	c18-0428_20180702_01__875__514__932__561
0	52.0	c18-0428_20180702_01__275__531__335__583
0	52.0	c18-0428_20180702_01__620__446__691__511
0	52.0	c19-0840_20191016_01__152__165__222__225
0	53.0	c15-1029_20151230_02__89__18__166__89
1	53.0	c17-0161_20170307_01__387__748__434__785
0	53.0	c17-0161_20170307_01__966__95__1020__142
1	53.0	c17-0161_20170307_01__270__849__329__900
1	53.0	c17-0452_20170717_01__1080__557__1131__594
0	53.0	c17-0452_20170717_01__369__560__421__602
0	53.0	c17-0452_20170717_01__1012__205__1062__245
0	53.0	c17-0452_20170717_01__596__88__648__125
0	53.0	c17-0452_20170717_01__479__469__522__502
0	53.0	c17-0452_20170717_01__262__196__328__252
1	53.0	c17-0452_20170717_01__1043__9__1095__51
1	53.0	c17-0452_20170717_01__114__849__162__886
0	53.0	c18-0020_20180109_01__803__439__859__491
0	53.0	c18-0020_20180109_01__968__718__1031__776
1	53.0	c18-0020_20180109_01__944__55__991__97
0	53.0	c18-0020_20180109_01__1104__537__1156__579
0	53.0	c17-0280_20170508_01__399__694__467__747
1	53.0	c17-0280_20170508_01__713__626__773__675
0	53.0	c17-0280_20170508_01__646__-5__694__37
1	53.0	c17-0280_20170508_01__294__253__347__299
0	53.0	c15-1051_20151229_02__621__782__686__839
1	53.0	c18-0610_20180907_02__783__736__875__820
0	53.0	c16-689_20160921_01__542__505__589__545
0	53.0	c16-689_20160921_01__258__252__316__297
0	53.0	c16-689_20160921_01__272__432__337__487
0	53.0	c16-689_20160921_01__587__117__645__161
0	53.0	c16-689_20160921_01__698__588__748__627
0	53.0	c16-689_20160921_01__601__569__653__616
0	53.0	c16-689_20160921_01__1163__219__1219__273
1	53.0	c16-616_20160822_01__1046__85__1131__163
0	53.0	c16-616_20160822_01__365__161__431__220
1	53.0	c16-616_20160822_01__312__232__396__321
1	53.0	c16-616_20160822_01__417__778__502__850
0	53.0	c18-0562_20180822_01__649__365__708__413
0	53.0	c18-0562_20180822_01__-5__349__42__391
0	53.0	c15-0477_20150609_01__1208__633__1277__692
0	53.0	c15-0477_20150609_01__776__429__863__511
0	53.0	c15-953_20151120_01__891__367__943__409
1	53.0	c15-953_20151120_01__664__288__716__330
0	53.0	c15-953_20151120_01__1036__194__1076__226
0	53.0	c15-953_20151120_01__515__274__560__313
1	53.0	c18-0764_20181107_02__987__351__1051__411
0	53.0	c18-0428_20180702_01__634__318__744__411
1	53.0	c18-0428_20180702_01__158__533__243__596
1	53.0	c18-0428_20180702_01__893__179__971__244
1	53.0	c18-0428_20180702_01__1155__493__1251__572
0	53.0	c15-0130_20150228_01__994__18__1055__69
0	53.0	c20-0019_20200110_01__473__302__541__360
0	53.0	c20-0019_20200110_01__702__699__799__780
0	54.0	c19-0677_20190819_01__1184__369__1254__430
0	54.0	c19-0677_20190819_01__1204__150__1266__198
0	54.0	c17-0161_20170307_01__211__457__268__504
0	54.0	c17-0452_20170717_01__1137__388__1189__430
0	54.0	c17-0452_20170717_01__347__351__404__421
0	54.0	c17-0452_20170717_01__538__330__583__363
0	54.0	c17-0452_20170717_01__820__331__881__387
0	54.0	c17-0452_20170717_01__779__588__836__639
1	54.0	c18-0020_20180109_01__660__811__728__869
1	54.0	c18-0020_20180109_01__852__55__904__97
1	54.0	c18-0020_20180109_01__93__218__153__268
1	54.0	c18-0020_20180109_01__976__322__1025__364
1	54.0	c17-0280_20170508_01__321__565__396__635
1	54.0	c17-0280_20170508_01__1008__399__1130__530
1	54.0	c17-0280_20170508_01__239__598__302__654
1	54.0	c17-0280_20170508_01__591__165__662__225
1	54.0	c17-0280_20170508_01__65__131__135__194
1	54.0	c17-0280_20170508_01__417__739__483__795
0	54.0	c17-0665_20170926_01__780__681__835__725
0	54.0	c18-0245_20180416_01__638__27__695__74
0	54.0	c18-0245_20180416_01__610__758__681__821
0	54.0	c18-0245_20180416_01__582__94__636__135
0	54.0	c18-0245_20180416_01__756__13__808__55
0	54.0	c16-689_20160921_01__632__426__690__478
0	54.0	c16-689_20160921_01__408__231__488__306
0	54.0	c16-689_20160921_01__609__374__656__411
0	54.0	c16-689_20160921_01__618__113__669__155
0	54.0	c16-689_20160921_01__602__867__666__920
0	54.0	c16-689_20160921_01__568__867__625__918
0	54.0	c16-616_20160822_01__948__214__1029__287
0	54.0	c16-616_20160822_01__956__704__999__746
0	54.0	c16-616_20160822_01__946__739__1011__799
1	54.0	c18-0562_20180822_01__877__747__931__793
0	54.0	c17-0360_20170607_01__589__333__657__389
0	54.0	c16-73_20160203_01__743__498__785__533
0	54.0	c16-73_20160203_01__740__514__806__571
1	54.0	c15-953_20151120_01__945__620__1008__673
1	54.0	c16-761_20161021_01__485__691__549__749
1	54.0	c18-0428_20180702_01__515__27__581__85
1	54.0	c15-0130_20150228_01__1081__296__1137__338
1	54.0	c15-0130_20150228_01__1105__603__1177__676
0	54.0	c20-0019_20200110_01__716__788__784__847
0	55.0	c15-1029_20151230_02__925__179__991__235
0	55.0	c19-0677_20190819_01__37__32__93__79
0	55.0	c19-0677_20190819_01__621__153__705__227
1	55.0	c17-0161_20170307_01__408__505__481__578
0	55.0	c17-0161_20170307_01__389__260__465__321
0	55.0	c17-0161_20170307_01__13__867__61__904
0	55.0	c17-0452_20170717_01__178__533__230__575
0	55.0	c17-0452_20170717_01__695__612__752__670
1	55.0	c17-0452_20170717_01__18__698__72__738
1	55.0	c17-0452_20170717_01__808__4__865__51
0	55.0	c17-0452_20170717_01__194__27__255__74
0	55.0	c17-0452_20170717_01__963__731__1021__778
1	55.0	c18-0020_20180109_01__130__496__210__564
0	55.0	c18-0020_20180109_01__879__447__931__487
0	55.0	c18-0020_20180109_01__478__805__571__885
0	55.0	c18-0020_20180109_01__956__669__1013__716
1	55.0	c15-0323_20150422_01__812__633__883__696
0	55.0	c16-578_20160804_01__907__753__979__812
1	55.0	c17-0280_20170508_01__982__240__1030__278
1	55.0	c17-0280_20170508_01__843__300__895__347
1	55.0	c17-0280_20170508_01__925__319__998__384
1	55.0	c17-0280_20170508_01__907__674__964__723
1	55.0	c17-0280_20170508_01__234__876__295__937
0	55.0	c17-0280_20170508_01__202__540__259__584
0	55.0	c17-0280_20170508_01__371__132__421__171
1	55.0	c17-0280_20170508_01__1194__93__1254__145
1	55.0	c17-0280_20170508_01__999__218__1048__259
1	55.0	c17-0280_20170508_01__710__546__770__596
1	55.0	c17-0665_20170926_01__424__323__488__377
0	55.0	c18-0245_20180416_01__563__839__639__899
0	55.0	c18-0245_20180416_01__1036__129__1091__178
0	55.0	c18-0610_20180907_02__824__279__895__339
1	55.0	c18-0610_20180907_02__618__350__740__465
0	55.0	c16-689_20160921_01__321__890__387__946
1	55.0	c16-689_20160921_01__944__383__996__425
1	55.0	c16-689_20160921_01__321__679__387__739
0	55.0	c16-616_20160822_01__316__474__382__530
0	55.0	c16-616_20160822_01__1031__179__1097__235
0	55.0	c16-616_20160822_01__688__94__737__135
1	55.0	c18-0562_20180822_01__890__397__946__440
0	55.0	c16-73_20160203_01__204__88__268__137
0	55.0	c16-73_20160203_01__481__265__542__311
0	55.0	c15-953_20151120_01__1077__617__1119__650
1	55.0	c16-761_20161021_01__789__466__875__541
0	55.0	c18-0428_20180702_01__20__293__81__352
1	55.0	c18-0428_20180702_01__83__498__156__562
0	55.0	c18-0428_20180702_01__241__759__302__809
0	55.0	c18-0428_20180702_01__1020__295__1086__352
0	55.0	c18-0428_20180702_01__568__531__629__582
0	55.0	c16-352_20160525_02__38__725__112__788
0	55.0	c20-0019_20200110_01__4__9__117__125
0	56.0	c16-398_20160612_01__602__265__652__307
0	56.0	c15-635_20150722_01__376__598__433__648
0	56.0	c17-0161_20170307_01__555__-1__609__41
0	56.0	c17-0161_20170307_01__202__269__249__311
1	56.0	c17-0161_20170307_01__596__345__648__389
0	56.0	c17-0161_20170307_01__278__510__352__576
1	56.0	c17-0161_20170307_01__517__9__588__69
0	56.0	c17-0161_20170307_01__1235__823__1282__860
0	56.0	c17-0161_20170307_01__1212__714__1261__754
1	56.0	c17-0161_20170307_01__369__122__435__180
1	56.0	c17-0452_20170717_01__55__37__98__69
1	56.0	c17-0452_20170717_01__34__250__98__303
0	56.0	c17-0452_20170717_01__1230__705__1284__750
0	56.0	c17-0452_20170717_01__4__773__61__820
1	56.0	c17-0452_20170717_01__1053__897__1115__955
0	56.0	c18-0020_20180109_01__484__551__558__615
0	56.0	c18-0020_20180109_01__678__479__735__535
1	56.0	c18-0020_20180109_01__60__304__131__369
0	56.0	c18-0020_20180109_01__883__299__935__346
0	56.0	c17-0266_20170427_01__824__783__897__846
0	56.0	c17-0280_20170508_01__1031__660__1102__725
1	56.0	c17-0280_20170508_01__1105__320__1196__403
0	56.0	c17-0280_20170508_01__181__538__226__575
0	56.0	c17-0280_20170508_01__907__139__957__182
0	56.0	c17-0280_20170508_01__626__198__670__231
1	56.0	c17-0280_20170508_01__985__301__1038__346
1	56.0	c17-0280_20170508_01__657__521__730__587
0	56.0	c15-1051_20151229_02__868__243__924__288
0	56.0	c18-0245_20180416_01__1109__899__1163__946
0	56.0	c16-689_20160921_01__1135__434__1210__495
0	56.0	c16-689_20160921_01__481__60__556__125
0	56.0	c16-689_20160921_01__550__698__599__740
1	56.0	c16-689_20160921_01__185__844__242__892
0	56.0	c16-689_20160921_01__674__442__726__487
0	56.0	c16-616_20160822_01__284__305__351__366
1	56.0	c16-616_20160822_01__192__507__277__585
0	56.0	c16-616_20160822_01__834__857__904__918
1	56.0	c16-616_20160822_01__502__773__593__874
1	56.0	c16-616_20160822_01__868__829__942__894
1	56.0	c16-616_20160822_01__334__698__407__759
1	56.0	c18-0562_20180822_01__515__15__600__93
0	56.0	c18-0562_20180822_01__1060__274__1117__316
0	56.0	c18-0562_20180822_01__806__433__858__473
0	56.0	c15-0477_20150609_01__739__403__803__454
1	56.0	c15-0284_20150415_01__616__367__719__458
0	56.0	c15-1032_20151224_01__1026__519__1092__575
1	56.0	c15-0257_20150407_02__565__430__657__512
0	56.0	c15-953_20151120_01__1082__822__1135__866
0	56.0	c15-953_20151120_01__-5__32__37__65
1	56.0	c15-953_20151120_01__944__379__991__421
1	56.0	c16-761_20161021_01__456__298__543__378
1	56.0	c18-0428_20180702_01__721__339__787__397
0	56.0	c20-0019_20200110_01__1198__18__1264__69
1	56.0	c20-0019_20200110_01__481__360__538__407
1	56.0	c19-0840_20191016_01__780__446__856__516
1	57.0	c16-398_20160612_01__32__762__89__808
1	57.0	c15-802_20150928_02__559__327__685__458
1	57.0	c15-635_20150722_01__657__211__761__298
0	57.0	c19-0677_20190819_01__264__44__331__101
1	57.0	c17-0161_20170307_01__570__905__625__949
0	57.0	c17-0161_20170307_01__736__328__784__368
1	57.0	c17-0452_20170717_01__1109__360__1165__411
1	57.0	c17-0452_20170717_01__113__617__158__650
1	57.0	c17-0452_20170717_01__256__780__314__829
0	57.0	c17-0452_20170717_01__959__603__1021__660
0	57.0	c17-0452_20170717_01__775__783__822__816
0	57.0	c17-0452_20170717_01__208__460__264__507
0	57.0	c17-0452_20170717_01__486__488__538__535
1	57.0	c18-0020_20180109_01__204__193__269__251
0	57.0	c18-0020_20180109_01__463__106__526__157
1	57.0	c18-0020_20180109_01__135__736__213__803
0	57.0	c18-0020_20180109_01__962__583__1020__637
0	57.0	c18-0020_20180109_01__737__653__808__705
1	57.0	c18-0020_20180109_01__298__333__360__389
0	57.0	c15-0323_20150422_01__848__483__918__544
1	57.0	c17-0280_20170508_01__-1__350__44__389
1	57.0	c17-0280_20170508_01__1091__32__1145__76
1	57.0	c17-0280_20170508_01__197__283__254__330
0	57.0	c17-0280_20170508_01__344__295__387__330
1	57.0	c18-0610_20180907_02__869__697__954__777
0	57.0	c18-0610_20180907_02__669__565__735__621
1	57.0	c16-689_20160921_01__856__296__940__369
0	57.0	c16-689_20160921_01__962__638__1033__702
0	57.0	c16-616_20160822_01__1109__283__1156__321
1	57.0	c16-616_20160822_01__602__365__738__497
1	57.0	c18-0852_20181213_01__88__406__195__510
1	57.0	c15-0098_20150205_01__450__584__570__687
1	57.0	c16-107_20160222_01__1174__555__1240__611
1	57.0	c15-0257_20150407_02__811__320__877__384
0	57.0	c15-953_20151120_01__213__436__261__473
0	57.0	c15-953_20151120_01__13__712__84__770
0	57.0	c15-953_20151120_01__836__352__888__396
0	57.0	c15-953_20151120_01__13__379__70__430
0	57.0	c18-0428_20180702_01__1221__-5__1282__46
0	57.0	c15-0130_20150228_01__128__183__199__239
1	57.0	c20-0019_20200110_01__1193__508__1282__587
1	57.0	c20-0019_20200110_01__462__334__525__388
0	58.0	c17-0161_20170307_01__492__91__556__147
0	58.0	c17-0452_20170717_01__619__858__669__896
1	58.0	c17-0452_20170717_01__1000__27__1047__65
1	58.0	c18-0020_20180109_01__46__246__117__316
1	58.0	c18-0020_20180109_01__-5__341__51__393
1	58.0	c18-0020_20180109_01__441__433__522__495
1	58.0	C-15-877_20151102_02__326__383__418__473
0	58.0	c17-0280_20170508_01__332__317__396__370
1	58.0	c17-0280_20170508_01__1212__217__1256__259
1	58.0	c17-0280_20170508_01__843__526__906__578
0	58.0	c17-0280_20170508_01__188__236__237__276
1	58.0	c17-0280_20170508_01__133__583__199__644
1	58.0	c17-0280_20170508_01__1058__18__1115__65
0	58.0	c18-0772_20181112_01__836__228__902__284
1	58.0	c17-0665_20170926_01__344__496__407__547
0	58.0	c19-0284_20190424_01__321__876__396__941
0	58.0	c19-0284_20190424_01__1132__727__1201__787
0	58.0	c18-0610_20180907_02__678__871__754__937
0	58.0	c16-689_20160921_01__35__423__98__479
1	58.0	c16-689_20160921_01__1026__113__1091__167
0	58.0	c16-689_20160921_01__797__27__863__83
0	58.0	c16-689_20160921_01__650__27__716__83
0	58.0	c16-689_20160921_01__215__208__283__261
0	58.0	c16-616_20160822_01__1041__460__1098__507
1	58.0	c15-0477_20150609_01__1076__186__1144__247
0	58.0	c15-953_20151120_01__657__117__714__161
0	58.0	c20-0019_20200110_01__234__389__295__442
1	58.0	c20-0019_20200110_01__454__358__512__413
0	58.0	c20-0019_20200110_01__986__800__1076__890
1	59.0	c15-0510_20150615_01__556__729__676__881
1	59.0	c17-0161_20170307_01__1212__738__1278__794
0	59.0	c17-0452_20170717_01__815__274__872__325
0	59.0	c17-0452_20170717_01__264__293__323__340
0	59.0	c17-0452_20170717_01__13__298__63__336
0	59.0	c17-0452_20170717_01__1069__445__1116__485
0	59.0	c17-0452_20170717_01__138__152__181__190
0	59.0	c17-0452_20170717_01__715__336__775__380
1	59.0	c18-0020_20180109_01__461__481__531__558
0	59.0	c17-0280_20170508_01__1209__198__1259__236
1	59.0	c17-0280_20170508_01__519__505__580__557
0	59.0	c18-0245_20180416_01__51__410__112__461
1	59.0	c18-0610_20180907_02__373__512__471__600
0	59.0	c16-689_20160921_01__33__400__94__453
0	59.0	c16-689_20160921_01__704__327__765__379
0	59.0	c16-616_20160822_01__939__169__1010__225
0	59.0	c16-616_20160822_01__289__274__352__325
0	59.0	c16-616_20160822_01__403__269__465__316
0	59.0	c18-0562_20180822_01__79__556__131__594
0	59.0	c17-0360_20170607_01__401__186__479__252
1	59.0	c15-0257_20150407_02__538__392__609__452
0	59.0	c16-73_20160203_01__1230__843__1284__888
1	59.0	c18-0428_20180702_01__764__234__889__348
1	59.0	c18-0428_20180702_01__336__553__402__608
1	60.0	c17-0452_20170717_01__74__624__142__682
1	60.0	c17-0452_20170717_01__1008__864__1071__913
1	60.0	c17-0452_20170717_01__564__25__611__65
0	60.0	c18-0020_20180109_01__460__537__515__581
1	60.0	c18-0020_20180109_01__549__544__601__591
0	60.0	c18-0020_20180109_01__789__655__841__697
1	60.0	c18-0020_20180109_01__234__767__281__809
0	60.0	c16-578_20160804_01__955__748__1006__787
1	60.0	c17-0280_20170508_01__619__323__690__386
1	60.0	c17-0280_20170508_01__509__107__580__174
1	60.0	c17-0280_20170508_01__877__840__966__919
1	60.0	c17-0280_20170508_01__37__342__84__380
1	60.0	c17-0280_20170508_01__893__283__961__341
1	60.0	c17-0280_20170508_01__779__756__830__793
1	60.0	c17-0280_20170508_01__373__681__433__735
0	60.0	c18-0245_20180416_01__883__565__1001__672
0	60.0	c16-689_20160921_01__788__343__846__393
1	60.0	c16-689_20160921_01__660__603__721__656
0	60.0	c16-689_20160921_01__4__155__61__207
0	60.0	c16-689_20160921_01__763__396__817__447
0	60.0	c16-616_20160822_01__981__682__1042__733
1	60.0	c15-0477_20150609_01__1207__41__1278__102
0	60.0	c17-0360_20170607_01__195__448__254__501
1	60.0	c15-0257_20150407_02__421__482__515__569
0	60.0	c19-0843_20191017_01__899__224__966__283
1	60.0	c16-761_20161021_01__726__433__833__535
1	60.0	c18-0428_20180702_01__678__740__740__792
1	60.0	c18-0428_20180702_01__522__772__593__834
0	61.0	c17-0452_20170717_01__183__301__232__343
1	61.0	c17-0452_20170717_01__1216__193__1268__235
0	61.0	c17-0452_20170717_01__247__552__307__603
0	61.0	c17-0452_20170717_01__395__699__449__748
0	61.0	c18-0020_20180109_01__897__408__942__446
1	61.0	c17-0280_20170508_01__836__600__881__645
1	61.0	c17-0280_20170508_01__450__591__523__648
0	61.0	c17-0280_20170508_01__69__305__119__350
1	61.0	c17-0280_20170508_01__297__410__389__484
1	61.0	c17-0280_20170508_01__1072__109__1136__164
0	61.0	c16-689_20160921_01__216__913__259__948
0	61.0	c16-689_20160921_01__46__122__103__170
1	61.0	c16-689_20160921_01__751__265__822__321
0	61.0	c16-689_20160921_01__829__469__890__521
1	61.0	c16-689_20160921_01__905__604__965__654
0	61.0	c16-689_20160921_01__630__18__682__65
0	61.0	c16-689_20160921_01__566__538__621__580
1	61.0	c16-616_20160822_01__1184__240__1242__294
0	61.0	c16-616_20160822_01__1059__239__1107__277
1	61.0	c17-0360_20170607_01__339__476__395__523
1	61.0	c15-0257_20150407_02__367__469__451__553
1	61.0	c16-761_20161021_01__785__436__865__512
1	61.0	c18-0428_20180702_01__674__683__735__735
0	61.0	c18-0428_20180702_01__834__65__909__130
1	61.0	c18-0428_20180702_01__676__712__732__756
1	61.0	c16-352_20160525_02__611__279__696__355
1	61.0	c18-0500_20180726_01__794__381__919__500
0	62.0	c15-1029_20151230_02__693__274__769__339
0	62.0	c17-0161_20170307_01__967__840__1026__893
0	62.0	c17-0161_20170307_01__719__347__781__398
1	62.0	c17-0161_20170307_01__138__703__215__770
1	62.0	c17-0452_20170717_01__1198__159__1240__189
0	62.0	c17-0452_20170717_01__765__424__822__473
0	62.0	c17-0452_20170717_01__218__204__275__260
1	62.0	c17-0452_20170717_01__197__383__249__425
1	62.0	c18-0020_20180109_01__1081__809__1156__876
1	62.0	c18-0020_20180109_01__371__460__442__523
1	62.0	c17-0280_20170508_01__144__297__214__375
1	62.0	c18-0772_20181112_01__591__46__639__88
0	62.0	c18-0245_20180416_01__254__777__362__887
0	62.0	c18-0245_20180416_01__481__41__561__111
0	62.0	c16-689_20160921_01__545__669__600__711
0	62.0	c16-689_20160921_01__289__279__360__341
0	62.0	c16-689_20160921_01__862__640__909__682
0	62.0	c16-689_20160921_01__578__145__640__199
1	62.0	c16-689_20160921_01__197__857__257__905
0	62.0	c16-616_20160822_01__718__745__787__807
0	62.0	c17-0360_20170607_01__275__327__336__383
1	62.0	c16-107_20160222_01__691__536__799__635
1	62.0	c15-0257_20150407_02__464__378__533__439
0	62.0	c16-73_20160203_01__637__507__722__594
1	62.0	c15-725_20150827_01__794__338__880__417
1	62.0	c15-953_20151120_01__1065__88__1124__141
1	62.0	c16-761_20161021_01__440__246__564__391
0	62.0	c18-0428_20180702_01__1104__764__1187__839
0	63.0	c17-0161_20170307_01__645__719__705__770
0	63.0	c17-0452_20170717_01__906__762__966__814
0	63.0	c17-0452_20170717_01__566__601__618__655
0	63.0	c17-0452_20170717_01__1137__876__1196__927
1	63.0	c17-0452_20170717_01__417__474__469__516
1	63.0	c17-0452_20170717_01__194__417__247__460
1	63.0	c18-0020_20180109_01__519__153__570__196
1	63.0	c17-0280_20170508_01__699__645__770__698
1	63.0	c17-0280_20170508_01__85__515__145__562
1	63.0	c17-0280_20170508_01__1240__247__1282__284
1	63.0	c17-0280_20170508_01__444__204__516__270
0	63.0	c18-0772_20181112_01__967__723__1044__789
0	63.0	c16-689_20160921_01__778__18__830__60
0	63.0	c16-689_20160921_01__840__410__892__452
0	63.0	c16-689_20160921_01__802__457__858__511
0	63.0	c16-689_20160921_01__669__140__726__187
0	63.0	c16-616_20160822_01__147__500__218__561
0	63.0	c16-616_20160822_01__1155__293__1203__330
0	63.0	c17-0360_20170607_01__295__736__353__785
0	63.0	c15-0257_20150407_02__626__352__711__431
1	63.0	c15-0257_20150407_02__509__379__566__430
0	63.0	c18-0428_20180702_01__627__712__691__765
0	63.0	c20-0019_20200110_01__1032__391__1103__451
0	64.0	c19-0677_20190819_01__60__4__126__65
0	64.0	c17-0161_20170307_01__911__649__954__686
1	64.0	c17-0161_20170307_01__202__676__268__732
0	64.0	c17-0161_20170307_01__277__257__348__318
0	64.0	c17-0452_20170717_01__422__265__469__302
0	64.0	c17-0452_20170717_01__788__438__846__488
0	64.0	c17-0452_20170717_01__939__644__987__681
1	64.0	c17-0452_20170717_01__193__909__240__951
0	64.0	c17-0452_20170717_01__1190__503__1245__545
0	64.0	c18-0020_20180109_01__944__474__1001__521
1	64.0	c18-0020_20180109_01__1193__303__1256__361
0	64.0	c18-0020_20180109_01__1064__397__1120__441
1	64.0	c18-0772_20181112_01__925__579__987__635
1	64.0	c15-1051_20151229_02__1052__327__1118__385
0	64.0	c18-0245_20180416_01__690__236__753__290
0	64.0	c16-689_20160921_01__457__780__523__838
1	64.0	c16-689_20160921_01__147__876__208__927
0	64.0	c16-616_20160822_01__118__538__178__588
1	64.0	c15-0477_20150609_01__547__387__615__445
0	64.0	c17-0360_20170607_01__563__203__625__254
1	64.0	c15-0257_20150407_02__644__318__726__391
1	64.0	c15-0130_20150228_01__793__280__884__356
1	65.0	c15-725_20150827_02__958__182__1049__260
1	65.0	c17-0161_20170307_01__780__360__849__418
1	65.0	c17-0452_20170717_01__321__83__378__130
1	65.0	c18-0020_20180109_01__527__179__588__230
1	65.0	c18-0020_20180109_01__422__13__497__79
1	65.0	c18-0020_20180109_01__884__756__964__828
1	65.0	c17-0280_20170508_01__465__899__520__943
1	65.0	c17-0280_20170508_01__669__219__737__280
1	65.0	c17-0280_20170508_01__531__-1__602__60
1	65.0	c17-0280_20170508_01__1035__612__1097__673
0	65.0	c18-0772_20181112_01__619__198__677__248
0	65.0	c19-0284_20190424_01__760__412__865__510
0	65.0	c18-0245_20180416_01__128__540__190__592
1	65.0	c15-1045_20151229_01__230__493__321__572
0	65.0	c16-689_20160921_01__476__755__538__804
0	65.0	c16-689_20160921_01__829__503__886__552
0	65.0	c16-689_20160921_01__62__408__126__464
0	65.0	c16-616_20160822_01__1109__627__1188__696
0	65.0	c18-0562_20180822_01__568__169__662__253
0	65.0	c18-0252_20180416_01__190__551__270__625
1	65.0	c18-0602_20180907_02__623__353__703__427
1	65.0	c16-352_20160525_02__696__382__803__482
0	65.0	c20-0019_20200110_01__9__876__89__946
0	66.0	c17-0452_20170717_01__1169__508__1214__541
1	66.0	c17-0452_20170717_01__960__139__1020__190
1	66.0	c17-0280_20170508_01__174__167__240__225
1	66.0	c17-0280_20170508_01__97__312__164__372
1	66.0	c17-0280_20170508_01__122__650__181__695
1	66.0	c17-0280_20170508_01__707__192__764__242
1	66.0	c17-0280_20170508_01__229__569__295__621
0	66.0	c18-0245_20180416_01__550__876__618__932
0	66.0	c16-689_20160921_01__867__660__919__707
0	66.0	c16-689_20160921_01__611__546__664__588
0	66.0	c16-616_20160822_01__1166__146__1234__205
1	66.0	c15-0257_20150407_02__490__241__589__325
0	66.0	c18-0428_20180702_01__684__271__753__330
0	67.0	c17-0452_20170717_01__1141__848__1189__885
1	67.0	c17-0452_20170717_01__1165__883__1221__934
0	67.0	c17-0452_20170717_01__476__871__533__923
0	67.0	c17-0280_20170508_01__1039__339__1098__388
0	67.0	c17-0280_20170508_01__103__243__154__284
0	67.0	c17-0280_20170508_01__719__355__775__401
1	67.0	c17-0280_20170508_01__169__798__235__852
1	67.0	c17-0280_20170508_01__701__415__760__466
1	67.0	c15-1051_20151229_02__863__296__951__380
0	67.0	c18-0245_20180416_01__813__144__876__200
1	67.0	c16-689_20160921_01__1122__515__1188__572
1	67.0	c16-689_20160921_01__156__899__213__951
0	67.0	c16-689_20160921_01__555__560__607__602
0	67.0	c16-616_20160822_01__934__628__1000__684
0	67.0	c16-616_20160822_01__687__448__776__530
1	67.0	c18-0562_20180822_01__550__890__613__943
1	67.0	c18-0064_20180126_01__544__340__602__392
1	67.0	c17-0360_20170607_01__290__506__344__548
1	67.0	c15-0257_20150407_02__838__303__909__366
1	67.0	c19-0840_20191016_01__678__298__754__366
1	68.0	c16-398_20160612_01__172__301__262__383
0	68.0	c17-0161_20170307_01__792__434__857__487
0	68.0	c17-0452_20170717_01__181__6__235__51
1	68.0	c17-0452_20170717_01__539__843__588__885
0	68.0	c15-0597_20150714_01__481__669__561__739
1	68.0	c17-0280_20170508_01__264__639__324__690
1	68.0	c17-0280_20170508_01__433__348__507__414
0	68.0	c17-0280_20170508_01__32__669__70__702
0	68.0	c18-0772_20181112_01__589__205__645__254
1	68.0	c18-0772_20181112_01__669__18__754__97
0	68.0	c16-689_20160921_01__607__523__655__562
1	68.0	c16-689_20160921_01__1111__696__1193__766
0	68.0	c16-689_20160921_01__456__864__517__918
0	68.0	c16-689_20160921_01__495__781__561__837
0	68.0	c18-0064_20180126_01__211__778__302__867
0	68.0	c16-761_20161021_01__573__719__634__770
0	68.0	c16-761_20161021_01__768__783__856__859
0	69.0	c17-0161_20170307_01__678__731__732__778
1	69.0	c18-0020_20180109_01__477__604__535__659
1	69.0	c17-0280_20170508_01__1046__39__1102__91
0	69.0	c17-0280_20170508_01__274__605__331__652
1	69.0	c17-0280_20170508_01__601__210__670__269
1	69.0	c16-616_20160822_01__1050__312__1121__376
0	69.0	c16-616_20160822_01__1031__274__1092__330
1	69.0	c16-616_20160822_01__336__105__412__170
1	69.0	c18-0428_20180702_01__696__610__762__675
1	69.0	c16-352_20160525_02__1188__69__1264__149
1	70.0	c17-0452_20170717_01__32__198__84__250
1	70.0	c17-0452_20170717_01__390__339__438__381
1	70.0	c17-0452_20170717_01__258__669__313__713
1	70.0	c17-0280_20170508_01__434__227__496__284
1	70.0	c17-0280_20170508_01__951__300__1009__349
0	70.0	c16-689_20160921_01__706__515__768__566
0	70.0	c16-689_20160921_01__737__355__808__416
1	70.0	c16-689_20160921_01__1188__219__1250__270
1	70.0	c16-689_20160921_01__608__598__670__655
0	70.0	c16-616_20160822_01__1079__269__1133__311
0	70.0	c16-616_20160822_01__13__698__89__770
1	70.0	c18-0852_20181213_01__529__290__618__368
1	70.0	c15-0477_20150609_01__229__806__309__876
1	70.0	c15-0257_20150407_02__490__517__561__578
1	70.0	c15-953_20151120_01__1099__37__1165__88
0	70.0	c18-0428_20180702_01__337__731__424__808
0	70.0	c18-0428_20180702_01__55__778__145__860
0	70.0	c20-0019_20200110_01__1193__374__1278__449
0	71.0	c17-0161_20170307_01__93__125__164__183
0	71.0	c17-0280_20170508_01__491__288__538__330
1	71.0	c17-0280_20170508_01__998__41__1055__88
1	71.0	c16-689_20160921_01__797__895__870__960
1	71.0	c16-689_20160921_01__1188__451__1254__511
1	71.0	c15-0257_20150407_02__1032__312__1121__398
1	71.0	c19-0843_20191017_01__325__360__435__460
0	71.0	c16-73_20160203_01__771__441__874__548
1	72.0	c17-0280_20170508_01__440__913__492__951
0	72.0	c17-0360_20170607_01__408__408__469__464
0	73.0	c17-0161_20170307_01__243__105__307__159
0	73.0	c17-0452_20170717_01__465__897__517__941
0	73.0	c17-0452_20170717_01__1141__764__1185__797
0	73.0	c18-0020_20180109_01__775__398__827__442
0	73.0	c18-0020_20180109_01__490__435__547__481
1	73.0	c17-0280_20170508_01__573__65__639__116
1	73.0	c17-0280_20170508_01__778__346__834__394
0	73.0	c18-0772_20181112_01__596__174__653__225
1	73.0	c16-761_20161021_01__957__853__1030__918
1	74.0	c17-0161_20170307_01__751__369__799__407
0	74.0	c17-0452_20170717_01__836__300__897__352
1	74.0	c17-0280_20170508_01__382__254__442__303
0	74.0	c16-689_20160921_01__609__906__670__953
0	74.0	c16-616_20160822_01__291__526__350__575
0	74.0	c16-616_20160822_01__1026__242__1083__292
1	74.0	c15-953_20151120_01__792__160__874__225
0	75.0	c17-0452_20170717_01__962__647__1016__692
1	75.0	c18-0020_20180109_01__1162__697__1228__756
1	75.0	c17-0280_20170508_01__811__699__868__748
1	75.0	c17-0280_20170508_01__1019__764__1085__829
1	75.0	c17-0280_20170508_01__1106__604__1193__678
1	75.0	c17-0280_20170508_01__519__185__565__225
1	75.0	c17-0280_20170508_01__1226__726__1284__778
1	75.0	c18-0610_20180907_02__203__487__325__592
0	75.0	c16-689_20160921_01__385__279__455__335
0	75.0	c16-689_20160921_01__18__119__75__168
0	75.0	c16-616_20160822_01__966__723__1018__766
0	76.0	c17-0161_20170307_01__925__155__1005__221
0	76.0	c17-0452_20170717_01__660__98__716__145
1	76.0	c17-0280_20170508_01__834__247__890__294
1	77.0	c17-0161_20170307_01__783__318__838__363
0	77.0	c17-0161_20170307_01__669__379__735__439
1	77.0	c17-0161_20170307_01__207__647__262__696
0	77.0	c17-0280_20170508_01__550__97__607__148
1	77.0	c17-0280_20170508_01__1079__-5__1135__37
1	77.0	c17-0280_20170508_01__930__138__998__196
1	77.0	c16-761_20161021_01__41__792__126__862
1	78.0	c17-0280_20170508_01__51__51__135__130
0	78.0	c16-616_20160822_01__923__722__982__771
1	78.0	c20-0019_20200110_01__605__615__673__676
0	79.0	c17-0452_20170717_01__92__669__164__730
1	79.0	c18-0020_20180109_01__541__374__602__423
1	79.0	c17-0280_20170508_01__669__23__735__79
1	79.0	c18-0746_20181101_01__446__91__577__206
1	79.0	c16-689_20160921_01__185__913__240__955
1	79.0	c16-689_20160921_01__495__665__580__753
0	79.0	c16-616_20160822_01__998__291__1078__366
1	80.0	c17-0452_20170717_01__651__895__705__941
1	80.0	c18-0020_20180109_01__634__515__685__561
1	80.0	c17-0280_20170508_01__1017__18__1069__65
0	80.0	c16-689_20160921_01__490__642__542__684
0	81.0	c16-616_20160822_01__1049__298__1108__348
1	82.0	c15-1029_20151230_02__645__384__735__471
1	82.0	c17-0280_20170508_01__176__581__251__641
1	84.0	c17-0452_20170717_01__376__525__423__565
1	84.0	c17-0280_20170508_01__500__305__554__354
1	85.0	c17-0280_20170508_01__1232__94__1284__138
1	87.0	c17-0280_20170508_01__469__303__522__345
0	87.0	c16-616_20160822_01__1158__174__1210__216

## Sheet: Internal_Test
1=true	possibility	image ID and location (last 4 values)
1	77.0	c17-0161_20170307_01__783__318__838__363
0	77.0	c17-0161_20170307_01__669__379__735__439
1	77.0	c17-0161_20170307_01__207__647__262__696
0	76.0	c17-0161_20170307_01__925__155__1005__221
1	74.0	c17-0161_20170307_01__751__369__799__407
0	73.0	c17-0161_20170307_01__243__105__307__159
0	71.0	c17-0161_20170307_01__93__125__164__183
0	69.0	c17-0161_20170307_01__678__731__732__778
0	68.0	c17-0161_20170307_01__792__434__857__487
1	65.0	c17-0161_20170307_01__780__360__849__418
0	64.0	c17-0161_20170307_01__911__649__954__686
1	64.0	c17-0161_20170307_01__202__676__268__732
0	64.0	c17-0161_20170307_01__277__257__348__318
0	63.0	c17-0161_20170307_01__645__719__705__770
0	62.0	c17-0161_20170307_01__967__840__1026__893
0	62.0	c17-0161_20170307_01__719__347__781__398
1	62.0	c17-0161_20170307_01__138__703__215__770
1	59.0	c17-0161_20170307_01__1212__738__1278__794
0	58.0	c17-0161_20170307_01__492__91__556__147
1	57.0	c17-0161_20170307_01__570__905__625__949
0	57.0	c17-0161_20170307_01__736__328__784__368
0	56.0	c17-0161_20170307_01__555__-1__609__41
0	56.0	c17-0161_20170307_01__202__269__249__311
1	56.0	c17-0161_20170307_01__596__345__648__389
0	56.0	c17-0161_20170307_01__278__510__352__576
1	56.0	c17-0161_20170307_01__517__9__588__69
0	56.0	c17-0161_20170307_01__1235__823__1282__860
0	56.0	c17-0161_20170307_01__1212__714__1261__754
1	56.0	c17-0161_20170307_01__369__122__435__180
1	55.0	c17-0161_20170307_01__408__505__481__578
0	55.0	c17-0161_20170307_01__389__260__465__321
0	55.0	c17-0161_20170307_01__13__867__61__904
0	54.0	c17-0161_20170307_01__211__457__268__504
1	53.0	c17-0161_20170307_01__387__748__434__785
0	53.0	c17-0161_20170307_01__966__95__1020__142
1	53.0	c17-0161_20170307_01__270__849__329__900
0	52.0	c17-0161_20170307_01__698__369__757__418
0	52.0	c17-0161_20170307_01__-1__617__44__652
0	52.0	c17-0161_20170307_01__1158__252__1207__292
0	52.0	c17-0161_20170307_01__1146__51__1214__111
1	52.0	c17-0161_20170307_01__234__669__291__721
1	51.0	c17-0161_20170307_01__589__308__657__368
0	51.0	c17-0161_20170307_01__263__881__308__915
1	51.0	c17-0161_20170307_01__500__488__552__530
0	51.0	c17-0161_20170307_01__726__293__786__339
0	51.0	c17-0161_20170307_01__382__771__530__883
1	51.0	c17-0161_20170307_01__605__208__662__253
1	50.0	c17-0161_20170307_01__660__233__726__289
1	50.0	c17-0161_20170307_01__492__216__550__267
0	50.0	c17-0161_20170307_01__340__918__387__946
0	50.0	c17-0161_20170307_01__65__751__131__802
1	49.0	c17-0161_20170307_01__810__311__872__363
0	49.0	c17-0161_20170307_01__124__141__199__202
0	49.0	c17-0161_20170307_01__577__231__639__287
1	48.0	c17-0161_20170307_01__539__515__612__582
0	48.0	c17-0161_20170307_01__65__37__121__83
1	48.0	c17-0161_20170307_01__440__174__515__239
0	48.0	c17-0161_20170307_01__570__369__612__402
0	48.0	c17-0161_20170307_01__577__753__632__801
0	48.0	c17-0161_20170307_01__243__146__286__179
0	48.0	c17-0161_20170307_01__684__647__738__690
0	47.0	c17-0161_20170307_01__1202__388__1250__425
0	47.0	c17-0161_20170307_01__719__264__759__292
0	47.0	c17-0161_20170307_01__1207__579__1250__611
0	47.0	c17-0161_20170307_01__524__246__577__293
0	47.0	c17-0161_20170307_01__80__413__141__463
0	46.0	c17-0161_20170307_01__735__74__783__116
0	46.0	c17-0161_20170307_01__788__88__859__151
1	46.0	c17-0161_20170307_01__453__483__496__516
0	46.0	c17-0161_20170307_01__1218__614__1261__642
0	46.0	c17-0161_20170307_01__179__662__228__709
0	46.0	c17-0161_20170307_01__321__885__364__918
0	46.0	c17-0161_20170307_01__346__842__395__883
0	46.0	c17-0161_20170307_01__894__619__952__670
0	45.0	c17-0161_20170307_01__737__665__813__735
0	45.0	c17-0161_20170307_01__674__346__740__402
1	45.0	c17-0161_20170307_01__604__913__652__953
0	45.0	c17-0161_20170307_01__647__388__690__425
0	45.0	c17-0161_20170307_01__848__594__923__654
0	45.0	c17-0161_20170307_01__765__423__822__474
0	44.0	c17-0161_20170307_01__208__387__276__447
0	44.0	c17-0161_20170307_01__-1__412__67__470
0	44.0	c17-0161_20170307_01__719__404__789__469
0	44.0	c17-0161_20170307_01__861__71__938__132
0	44.0	c17-0161_20170307_01__551__191__625__254
0	44.0	c17-0161_20170307_01__660__460__740__539
0	43.0	c17-0161_20170307_01__921__565__968__602
0	43.0	c17-0161_20170307_01__698__288__745__325
0	43.0	c17-0161_20170307_01__808__399__856__441
0	43.0	c17-0161_20170307_01__18__764__93__829
0	43.0	c17-0161_20170307_01__1049__887__1110__939
0	42.0	c17-0161_20170307_01__648__504__700__548
0	42.0	c17-0161_20170307_01__175__196__300__298
0	42.0	c17-0161_20170307_01__274__23__326__69
1	42.0	c17-0161_20170307_01__408__444__451__477
0	42.0	c17-0161_20170307_01__178__811__225__848
0	42.0	c17-0161_20170307_01__1157__569__1228__635
1	79.0	c18-0746_20181101_01__446__91__577__206
1	40.0	c18-0746_20181101_01__980__857__1041__909
0	50.0	c15-1002_20151210_01__669__474__721__516
0	47.0	c15-1002_20151210_01__129__911__178__951
0	46.0	c15-1002_20151210_01__530__591__593__651
0	44.0	c15-1002_20151210_01__486__537__538__583
0	44.0	c15-1002_20151210_01__41__610__95__654
0	44.0	c15-1002_20151210_01__810__90__932__211
0	43.0	c15-1002_20151210_01__643__311__695__349
0	41.0	c15-1002_20151210_01__321__98__373__140
0	40.0	c15-1002_20151210_01__809__733__873__787
0	68.0	c15-0597_20150714_01__481__669__561__739
0	46.0	c15-0597_20150714_01__1116__448__1177__499
0	45.0	c15-0597_20150714_01__187__227__309__349
0	44.0	c15-0597_20150714_01__669__655__730__707
0	44.0	c15-0597_20150714_01__1062__332__1189__467
0	42.0	c15-0597_20150714_01__921__523__1029__677
0	42.0	c15-0597_20150714_01__256__437__325__509
0	87.0	c16-616_20160822_01__1158__174__1210__216
0	81.0	c16-616_20160822_01__1049__298__1108__348
0	79.0	c16-616_20160822_01__998__291__1078__366
0	78.0	c16-616_20160822_01__923__722__982__771
0	75.0	c16-616_20160822_01__966__723__1018__766
0	74.0	c16-616_20160822_01__291__526__350__575
0	74.0	c16-616_20160822_01__1026__242__1083__292
0	70.0	c16-616_20160822_01__1079__269__1133__311
0	70.0	c16-616_20160822_01__13__698__89__770
0	69.0	c16-616_20160822_01__1050__312__1121__376
1	69.0	c16-616_20160822_01__1031__274__1092__330
0	69.0	c16-616_20160822_01__336__105__412__170
1	67.0	c16-616_20160822_01__934__628__1000__684
0	67.0	c16-616_20160822_01__687__448__776__530
0	66.0	c16-616_20160822_01__1166__146__1234__205
0	65.0	c16-616_20160822_01__1109__627__1188__696
0	64.0	c16-616_20160822_01__118__538__178__588
0	63.0	c16-616_20160822_01__147__500__218__561
0	63.0	c16-616_20160822_01__1155__293__1203__330
0	62.0	c16-616_20160822_01__718__745__787__807
0	61.0	c16-616_20160822_01__1184__240__1242__294
1	61.0	c16-616_20160822_01__1059__239__1107__277
0	60.0	c16-616_20160822_01__981__682__1042__733
0	59.0	c16-616_20160822_01__939__169__1010__225
0	59.0	c16-616_20160822_01__289__274__352__325
0	59.0	c16-616_20160822_01__403__269__465__316
0	58.0	c16-616_20160822_01__1041__460__1098__507
0	57.0	c16-616_20160822_01__1109__283__1156__321
0	57.0	c16-616_20160822_01__602__365__738__497
1	56.0	c16-616_20160822_01__284__305__351__366
0	56.0	c16-616_20160822_01__192__507__277__585
1	56.0	c16-616_20160822_01__834__857__904__918
0	56.0	c16-616_20160822_01__502__773__593__874
1	56.0	c16-616_20160822_01__868__829__942__894
1	56.0	c16-616_20160822_01__334__698__407__759
1	55.0	c16-616_20160822_01__316__474__382__530
0	55.0	c16-616_20160822_01__1031__179__1097__235
0	55.0	c16-616_20160822_01__688__94__737__135
0	54.0	c16-616_20160822_01__948__214__1029__287
0	54.0	c16-616_20160822_01__956__704__999__746
0	54.0	c16-616_20160822_01__946__739__1011__799
0	53.0	c16-616_20160822_01__1046__85__1131__163
1	53.0	c16-616_20160822_01__365__161__431__220
0	53.0	c16-616_20160822_01__312__232__396__321
1	53.0	c16-616_20160822_01__417__778__502__850
1	52.0	c16-616_20160822_01__815__360__914__449
1	51.0	c16-616_20160822_01__385__514__471__594
0	51.0	c16-616_20160822_01__852__741__946__830
0	51.0	c16-616_20160822_01__561__80__665__172
1	51.0	c16-616_20160822_01__458__767__538__837
1	51.0	c16-616_20160822_01__345__488__435__574
0	50.0	c16-616_20160822_01__469__587__559__666
1	50.0	c16-616_20160822_01__443__136__521__202
1	49.0	c16-616_20160822_01__819__248__923__353
1	49.0	c16-616_20160822_01__126__298__224__384
0	49.0	c16-616_20160822_01__403__155__479__225
0	49.0	c16-616_20160822_01__120__515__173__558
0	49.0	c16-616_20160822_01__348__176__423__246
0	49.0	c16-616_20160822_01__-10__674__47__763
1	49.0	c16-616_20160822_01__714__562__806__653
1	49.0	c16-616_20160822_01__983__767__1061__840
1	49.0	c16-616_20160822_01__326__579__410__653
0	48.0	c16-616_20160822_01__709__322__796__399
1	48.0	c16-616_20160822_01__676__766__772__864
0	46.0	c16-616_20160822_01__767__447__836__503
0	46.0	c16-616_20160822_01__989__598__1071__678
0	44.0	c16-616_20160822_01__523__218__608__302
0	44.0	c16-616_20160822_01__1063__393__1115__432
1	44.0	c16-616_20160822_01__1056__483__1124__541
0	44.0	c16-616_20160822_01__273__545__321__582
0	43.0	c16-616_20160822_01__913__709__960__746
0	43.0	c16-616_20160822_01__632__260__716__339
0	43.0	c16-616_20160822_01__563__631__636__698
0	43.0	c16-616_20160822_01__119__437__194__502
0	42.0	c16-616_20160822_01__899__674__956__725
0	42.0	c16-616_20160822_01__62__426__137__494
0	42.0	c16-616_20160822_01__584__491__671__573
0	41.0	c16-616_20160822_01__604__299__675__352
0	41.0	c16-616_20160822_01__780__290__858__360
1	41.0	c16-616_20160822_01__810__565__886__635
0	40.0	c16-616_20160822_01__697__179__749__230
0	40.0	c16-616_20160822_01__441__332__521__402
0	40.0	c16-616_20160822_01__619__4__695__69
0	40.0	c16-616_20160822_01__1008__388__1088__458
0	48.0	c15-1014_20151215_01__481__288__533__330
1	48.0	c15-1014_20151215_01__693__129__750__177
1	48.0	c17-0910_20171215_01__647__696__704__746
1	43.0	c17-0910_20171215_01__1118__194__1161__228
1	41.0	c17-0910_20171215_01__469__830__525__881
1	71.0	c15-0257_20150407_02__1032__312__1121__398
1	70.0	c15-0257_20150407_02__490__517__561__578
1	67.0	c15-0257_20150407_02__838__303__909__366
1	66.0	c15-0257_20150407_02__490__241__589__325
1	64.0	c15-0257_20150407_02__644__318__726__391
1	63.0	c15-0257_20150407_02__626__352__711__431
1	63.0	c15-0257_20150407_02__509__379__566__430
1	62.0	c15-0257_20150407_02__464__378__533__439
0	61.0	c15-0257_20150407_02__367__469__451__553
0	60.0	c15-0257_20150407_02__421__482__515__569
0	59.0	c15-0257_20150407_02__538__392__609__452
0	57.0	c15-0257_20150407_02__811__320__877__384
0	56.0	c15-0257_20150407_02__565__430__657__512
1	52.0	c15-0257_20150407_02__437__418__531__502
1	51.0	c15-0257_20150407_02__991__628__1066__699
1	50.0	c15-0257_20150407_02__502__464__576__539
1	49.0	c15-0257_20150407_02__435__292__523__374
1	48.0	c15-0257_20150407_02__529__293__603__368
0	47.0	c15-0257_20150407_02__440__274__515__335
1	45.0	c15-0257_20150407_02__1193__857__1259__913
1	41.0	c15-0257_20150407_02__737__792__803__853
1	41.0	c15-0257_20150407_02__1160__496__1214__538
1	41.0	c15-0257_20150407_02__1198__544__1254__586
1	40.0	c15-0257_20150407_02__469__611__525__658
1	70.0	c15-0477_20150609_01__229__806__309__876
1	64.0	c15-0477_20150609_01__547__387__615__445
1	60.0	c15-0477_20150609_01__1207__41__1278__102
1	58.0	c15-0477_20150609_01__1076__186__1144__247
1	56.0	c15-0477_20150609_01__739__403__803__454
1	53.0	c15-0477_20150609_01__1208__633__1277__692
1	53.0	c15-0477_20150609_01__776__429__863__511
1	51.0	c15-0477_20150609_01__1191__398__1259__457
0	49.0	c15-0477_20150609_01__695__843__756__896
0	47.0	c15-0477_20150609_01__1039__199__1109__266
0	47.0	c15-0477_20150609_01__389__218__460__293
0	46.0	c15-0477_20150609_01__602__770__656__818
0	45.0	c15-0477_20150609_01__669__379__744__444
1	45.0	c15-0477_20150609_01__1095__843__1193__927
1	43.0	c15-0477_20150609_01__1079__504__1132__546
1	43.0	c15-0477_20150609_01__1151__724__1209__773
1	42.0	c15-0477_20150609_01__857__593__917__651
1	42.0	c15-0477_20150609_01__434__60__472__135
0	41.0	c15-0477_20150609_01__644__769__700__815
0	41.0	c15-0477_20150609_01__521__102__559__172
0	41.0	c15-0477_20150609_01__102__18__177__102
0	40.0	c15-0477_20150609_01__717__432__778__488
0	40.0	c15-0477_20150609_01__622__423__679__474
0	40.0	c15-0477_20150609_01__1127__46__1184__93
0	40.0	c15-0477_20150609_01__27__18__89__69
0	70.0	c18-0852_20181213_01__529__290__618__368
0	57.0	c18-0852_20181213_01__88__406__195__510
0	45.0	c18-0852_20181213_01__872__255__980__407
0	44.0	c18-0852_20181213_01__637__405__699__457
0	44.0	c18-0852_20181213_01__106__18__178__95
0	42.0	c18-0852_20181213_01__1216__23__1278__79
0	40.0	c18-0852_20181213_01__197__679__258__730
0	40.0	c18-0852_20181213_01__316__235__368__281
0	56.0	c15-0284_20150415_01__616__367__719__458
0	67.0	c18-0562_20180822_01__550__890__613__943
0	65.0	c18-0562_20180822_01__568__169__662__253
0	59.0	c18-0562_20180822_01__79__556__131__594
0	56.0	c18-0562_20180822_01__515__15__600__93
0	56.0	c18-0562_20180822_01__1060__274__1117__316
1	56.0	c18-0562_20180822_01__806__433__858__473
1	55.0	c18-0562_20180822_01__890__397__946__440
1	54.0	c18-0562_20180822_01__877__747__931__793
0	53.0	c18-0562_20180822_01__649__365__708__413
0	53.0	c18-0562_20180822_01__-5__349__42__391
0	52.0	c18-0562_20180822_01__1204__231__1256__278
0	52.0	c18-0562_20180822_01__375__331__424__373
0	52.0	c18-0562_20180822_01__468__829__532__886
1	51.0	c18-0562_20180822_01__1179__236__1226__273
1	50.0	c18-0562_20180822_01__279__843__336__890
0	49.0	c18-0562_20180822_01__277__465__357__537
0	49.0	c18-0562_20180822_01__1094__255__1139__291
1	49.0	c18-0562_20180822_01__1086__533__1136__574
0	48.0	c18-0562_20180822_01__633__204__690__255
0	48.0	c18-0562_20180822_01__544__765__605__817
1	47.0	c18-0562_20180822_01__591__525__639__572
1	47.0	c18-0562_20180822_01__1104__797__1156__841
0	47.0	c18-0562_20180822_01__362__574__416__618
0	47.0	c18-0562_20180822_01__897__204__963__260
0	46.0	c18-0562_20180822_01__556__731__631__796
0	46.0	c18-0562_20180822_01__1193__354__1240__396
1	45.0	c18-0562_20180822_01__1132__206__1187__252
0	45.0	c18-0562_20180822_01__483__200__540__247
0	45.0	c18-0562_20180822_01__617__111__698__171
1	45.0	c18-0562_20180822_01__619__525__671__567
1	45.0	c18-0562_20180822_01__573__316__625__358
0	44.0	c18-0562_20180822_01__568__149__625__195
0	44.0	c18-0562_20180822_01__504__218__570__274
0	44.0	c18-0562_20180822_01__980__895__1034__937
0	44.0	c18-0562_20180822_01__747__536__808__589
1	44.0	c18-0562_20180822_01__619__862__681__913
0	43.0	c18-0562_20180822_01__1003__239__1064__291
0	43.0	c18-0562_20180822_01__527__878__583__925
0	43.0	c18-0562_20180822_01__787__444__836__485
0	42.0	c18-0562_20180822_01__1053__239__1108__285
0	42.0	c18-0562_20180822_01__608__702__665__749
0	42.0	c18-0562_20180822_01__430__150__492__209
0	41.0	c18-0562_20180822_01__521__792__573__829
0	41.0	c18-0562_20180822_01__628__465__691__523
0	41.0	c18-0562_20180822_01__399__335__451__377
0	41.0	c18-0562_20180822_01__124__693__204__763
0	41.0	c18-0562_20180822_01__1085__811__1142__857
0	40.0	c18-0562_20180822_01__253__669__305__711
0	40.0	c18-0562_20180822_01__476__579__533__625
0	40.0	c18-0562_20180822_01__178__594__227__628
0	70.0	c18-0428_20180702_01__337__731__424__808
0	70.0	c18-0428_20180702_01__55__778__145__860
0	69.0	c18-0428_20180702_01__696__610__762__675
0	66.0	c18-0428_20180702_01__684__271__753__330
0	63.0	c18-0428_20180702_01__627__712__691__765
0	62.0	c18-0428_20180702_01__1104__764__1187__839
0	61.0	c18-0428_20180702_01__674__683__735__735
0	61.0	c18-0428_20180702_01__834__65__909__130
0	61.0	c18-0428_20180702_01__676__712__732__756
0	60.0	c18-0428_20180702_01__678__740__740__792
0	60.0	c18-0428_20180702_01__522__772__593__834
0	59.0	c18-0428_20180702_01__764__234__889__348
0	59.0	c18-0428_20180702_01__336__553__402__608
0	57.0	c18-0428_20180702_01__1221__-5__1282__46
1	56.0	c18-0428_20180702_01__721__339__787__397
0	55.0	c18-0428_20180702_01__20__293__81__352
0	55.0	c18-0428_20180702_01__83__498__156__562
1	55.0	c18-0428_20180702_01__241__759__302__809
0	55.0	c18-0428_20180702_01__1020__295__1086__352
0	55.0	c18-0428_20180702_01__568__531__629__582
0	54.0	c18-0428_20180702_01__515__27__581__85
1	53.0	c18-0428_20180702_01__634__318__744__411
0	53.0	c18-0428_20180702_01__158__533__243__596
1	53.0	c18-0428_20180702_01__893__179__971__244
1	53.0	c18-0428_20180702_01__1155__493__1251__572
1	52.0	c18-0428_20180702_01__875__514__932__561
1	52.0	c18-0428_20180702_01__275__531__335__583
1	52.0	c18-0428_20180702_01__620__446__691__511
0	51.0	c18-0428_20180702_01__637__676__705__737
1	51.0	c18-0428_20180702_01__9__555__65__602
0	50.0	c18-0428_20180702_01__582__103__655__168
1	49.0	c18-0428_20180702_01__341__462__407__518
0	49.0	c18-0428_20180702_01__275__764__327__807
0	48.0	c18-0428_20180702_01__803__347__856__390
0	48.0	c18-0428_20180702_01__77__576__151__655
1	48.0	c18-0428_20180702_01__18__762__79__818
0	47.0	c18-0428_20180702_01__276__620__349__681
1	47.0	c18-0428_20180702_01__536__285__596__335
1	47.0	c18-0428_20180702_01__691__376__750__425
1	47.0	c18-0428_20180702_01__125__649__177__695
1	47.0	c18-0428_20180702_01__1067__303__1131__355
0	46.0	c18-0428_20180702_01__1008__316__1077__382
0	46.0	c18-0428_20180702_01__916__512__973__559
1	45.0	c18-0428_20180702_01__935__136__996__187
0	45.0	c18-0428_20180702_01__298__797__373__862
0	45.0	c18-0428_20180702_01__614__646__687__704
0	45.0	c18-0428_20180702_01__413__528__479__584
0	45.0	c18-0428_20180702_01__472__499__528__546
0	44.0	c18-0428_20180702_01__612__228__675__280
0	44.0	c18-0428_20180702_01__1039__160__1107__220
0	44.0	c18-0428_20180702_01__1132__217__1191__268
0	44.0	c18-0428_20180702_01__621__512__692__575
1	44.0	c18-0428_20180702_01__850__524__904__573
0	43.0	c18-0428_20180702_01__719__859__792__920
0	43.0	c18-0428_20180702_01__437__574__522__649
1	43.0	c18-0428_20180702_01__597__853__652__901
0	43.0	c18-0428_20180702_01__481__302__561__372
0	43.0	c18-0428_20180702_01__447__420__513__479
1	43.0	c18-0428_20180702_01__515__411__565__455
0	42.0	c18-0428_20180702_01__693__29__785__116
1	42.0	c18-0428_20180702_01__46__537__107__588
0	42.0	c18-0428_20180702_01__1075__141__1133__190
0	42.0	c18-0428_20180702_01__1008__74__1074__130
0	42.0	c18-0428_20180702_01__243__532__319__597
0	42.0	c18-0428_20180702_01__1074__267__1138__316
0	42.0	c18-0428_20180702_01__521__351__592__407
0	42.0	c18-0428_20180702_01__96__660__160__716
0	42.0	c18-0428_20180702_01__638__323__699__374
0	41.0	c18-0428_20180702_01__323__400__398__475
0	41.0	c18-0428_20180702_01__554__555__615__607
0	41.0	c18-0428_20180702_01__691__-1__747__51
0	41.0	c18-0428_20180702_01__374__419__437__471
0	40.0	c18-0428_20180702_01__260__583__322__639
0	40.0	c18-0428_20180702_01__229__793__286__839
0	40.0	c18-0428_20180702_01__65__299__149__374
0	40.0	c18-0428_20180702_01__302__460__387__539
0	50.0	c19-0419_20190605_01__650__347__716__408
0	46.0	c19-0419_20190605_01__724__179__781__221
0	45.0	c19-0419_20190605_01__678__197__730__239
0	44.0	c19-0419_20190605_01__298__519__350__561
0	43.0	c19-0419_20190605_01__340__565__396__611
0	42.0	c19-0419_20190605_01__170__288__236__349
0	41.0	c19-0419_20190605_01__817__541__873__588
0	41.0	c19-0419_20190605_01__792__337__858__383
0	40.0	c19-0419_20190605_01__967__755__1019__797
0	45.0	c15-0297_20150414_01__495__241__622__363
0	67.0	c15-1051_20151229_02__863__296__951__380
0	64.0	c15-1051_20151229_02__1052__327__1118__385
0	56.0	c15-1051_20151229_02__868__243__924__288
0	53.0	c15-1051_20151229_02__621__782__686__839
0	50.0	c15-1051_20151229_02__486__665__542__711
1	48.0	c15-1051_20151229_02__55__111__103__149
1	47.0	c15-1051_20151229_02__973__666__1036__718
1	46.0	c15-1051_20151229_02__669__646__726__697
1	46.0	c15-1051_20151229_02__1151__806__1217__862
0	46.0	c15-1051_20151229_02__780__859__842__913
0	46.0	c15-1051_20151229_02__500__815__561__871
0	45.0	c15-1051_20151229_02__935__450__987__492
0	45.0	c15-1051_20151229_02__862__-5__918__41
0	45.0	c15-1051_20151229_02__534__750__583__785
0	44.0	c15-1051_20151229_02__638__155__690__197
0	44.0	c15-1051_20151229_02__685__310__745__363
0	44.0	c15-1051_20151229_02__920__787__962__820
0	43.0	c15-1051_20151229_02__602__725__656__768
1	43.0	c15-1051_20151229_02__992__819__1046__866
1	43.0	c15-1051_20151229_02__1090__217__1156__273
0	43.0	c15-1051_20151229_02__1036__336__1078__373
0	43.0	c15-1051_20151229_02__848__379__909__430
0	43.0	c15-1051_20151229_02__225__622__279__666
0	43.0	c15-1051_20151229_02__276__579__319__611
1	43.0	c15-1051_20151229_02__359__618__424__671
0	42.0	c15-1051_20151229_02__1026__388__1083__430
0	42.0	c15-1051_20151229_02__785__725__842__771
0	42.0	c15-1051_20151229_02__950__576__1000__616
0	42.0	c15-1051_20151229_02__152__141__208__188
0	41.0	c15-1051_20151229_02__944__483__987__521
0	41.0	c15-1051_20151229_02__739__762__789__804
0	41.0	c15-1051_20151229_02__829__569__895__621
0	41.0	c15-1051_20151229_02__971__239__1030__290
0	41.0	c15-1051_20151229_02__1085__607__1147__663
0	41.0	c15-1051_20151229_02__1051__83__1119__137
0	41.0	c15-1051_20151229_02__893__148__951__193
0	41.0	c15-1051_20151229_02__364__747__415__790
0	41.0	c15-1051_20151229_02__41__69__117__135
0	40.0	c15-1051_20151229_02__206__346__258__388
0	69.0	c16-352_20160525_02__1188__69__1264__149
0	65.0	c16-352_20160525_02__696__382__803__482
0	61.0	c16-352_20160525_02__611__279__696__355
0	55.0	c16-352_20160525_02__38__725__112__788
0	49.0	c16-352_20160525_02__776__712__832__760
0	49.0	c16-352_20160525_02__229__632__351__786
0	46.0	c16-352_20160525_02__687__467__748__518
0	45.0	c16-352_20160525_02__108__890__164__937
0	44.0	c16-352_20160525_02__1085__771__1156__832
0	43.0	c16-352_20160525_02__712__646__783__709
0	43.0	c16-352_20160525_02__1085__179__1147__230
0	42.0	c16-352_20160525_02__703__762__783__832
0	42.0	c16-352_20160525_02__114__233__171__279
0	41.0	c16-352_20160525_02__4__227__70__283
0	41.0	c16-352_20160525_02__843__46__900__93
0	41.0	c16-352_20160525_02__1160__497__1245__572
0	41.0	c16-352_20160525_02__669__698__737__756
0	41.0	c16-352_20160525_02__683__759__735__804
1	40.0	c16-352_20160525_02__1240__593__1282__653
1	67.0	c19-0840_20191016_01__678__298__754__366
1	56.0	c19-0840_20191016_01__780__446__856__516
1	52.0	c19-0840_20191016_01__152__165__222__225
0	50.0	c19-0840_20191016_01__65__700__140__761
0	47.0	c19-0840_20191016_01__1109__841__1198__913
0	47.0	c19-0840_20191016_01__716__55__768__97
0	46.0	c19-0840_20191016_01__646__498__698__541
0	46.0	c19-0840_20191016_01__559__4__629__65
0	45.0	c19-0840_20191016_01__117__688__176__737
0	45.0	c19-0840_20191016_01__792__376__856__437
0	43.0	c19-0840_20191016_01__692__69__749__116
0	42.0	c19-0840_20191016_01__285__348__358__410
0	41.0	c19-0840_20191016_01__46__255__112__311
0	68.0	c18-0064_20180126_01__211__778__302__867
0	67.0	c18-0064_20180126_01__544__340__602__392
0	51.0	c18-0064_20180126_01__790__453__856__511
0	50.0	c18-0064_20180126_01__733__644__789__691
0	47.0	c18-0064_20180126_01__993__510__1051__560
0	47.0	c18-0064_20180126_01__1179__382__1273__471
1	46.0	c18-0064_20180126_01__321__788__378__839
1	45.0	c18-0064_20180126_01__542__314__589__352
0	44.0	c18-0064_20180126_01__-1__778__61__829
0	43.0	c18-0064_20180126_01__92__512__150__567
0	41.0	c18-0064_20180126_01__550__708__609__756
1	41.0	c18-0064_20180126_01__713__615__779__674
1	40.0	c18-0064_20180126_01__1212__527__1282__593
0	87.0	c17-0280_20170508_01__469__303__522__345
0	85.0	c17-0280_20170508_01__1232__94__1284__138
1	84.0	c17-0280_20170508_01__500__305__554__354
0	82.0	c17-0280_20170508_01__176__581__251__641
0	80.0	c17-0280_20170508_01__1017__18__1069__65
0	79.0	c17-0280_20170508_01__669__23__735__79
0	78.0	c17-0280_20170508_01__51__51__135__130
1	77.0	c17-0280_20170508_01__550__97__607__148
0	77.0	c17-0280_20170508_01__1079__-5__1135__37
0	77.0	c17-0280_20170508_01__930__138__998__196
0	76.0	c17-0280_20170508_01__834__247__890__294
0	75.0	c17-0280_20170508_01__811__699__868__748
0	75.0	c17-0280_20170508_01__1019__764__1085__829
0	75.0	c17-0280_20170508_01__1106__604__1193__678
0	75.0	c17-0280_20170508_01__519__185__565__225
0	75.0	c17-0280_20170508_01__1226__726__1284__778
0	74.0	c17-0280_20170508_01__382__254__442__303
0	73.0	c17-0280_20170508_01__573__65__639__116
0	73.0	c17-0280_20170508_01__778__346__834__394
1	72.0	c17-0280_20170508_01__440__913__492__951
1	71.0	c17-0280_20170508_01__491__288__538__330
1	71.0	c17-0280_20170508_01__998__41__1055__88
1	70.0	c17-0280_20170508_01__434__227__496__284
1	70.0	c17-0280_20170508_01__951__300__1009__349
1	69.0	c17-0280_20170508_01__1046__39__1102__91
1	69.0	c17-0280_20170508_01__274__605__331__652
0	69.0	c17-0280_20170508_01__601__210__670__269
1	68.0	c17-0280_20170508_01__264__639__324__690
1	68.0	c17-0280_20170508_01__433__348__507__414
1	68.0	c17-0280_20170508_01__32__669__70__702
1	67.0	c17-0280_20170508_01__1039__339__1098__388
1	67.0	c17-0280_20170508_01__103__243__154__284
1	67.0	c17-0280_20170508_01__719__355__775__401
1	67.0	c17-0280_20170508_01__169__798__235__852
1	67.0	c17-0280_20170508_01__701__415__760__466
1	66.0	c17-0280_20170508_01__174__167__240__225
1	66.0	c17-0280_20170508_01__97__312__164__372
1	66.0	c17-0280_20170508_01__122__650__181__695
1	66.0	c17-0280_20170508_01__707__192__764__242
0	66.0	c17-0280_20170508_01__229__569__295__621
1	65.0	c17-0280_20170508_01__465__899__520__943
1	65.0	c17-0280_20170508_01__669__219__737__280
1	65.0	c17-0280_20170508_01__531__-1__602__60
1	65.0	c17-0280_20170508_01__1035__612__1097__673
0	63.0	c17-0280_20170508_01__699__645__770__698
1	63.0	c17-0280_20170508_01__85__515__145__562
1	63.0	c17-0280_20170508_01__1240__247__1282__284
1	63.0	c17-0280_20170508_01__444__204__516__270
0	62.0	c17-0280_20170508_01__144__297__214__375
0	61.0	c17-0280_20170508_01__836__600__881__645
0	61.0	c17-0280_20170508_01__450__591__523__648
0	61.0	c17-0280_20170508_01__69__305__119__350
1	61.0	c17-0280_20170508_01__297__410__389__484
1	61.0	c17-0280_20170508_01__1072__109__1136__164
1	60.0	c17-0280_20170508_01__619__323__690__386
1	60.0	c17-0280_20170508_01__509__107__580__174
1	60.0	c17-0280_20170508_01__877__840__966__919
1	60.0	c17-0280_20170508_01__37__342__84__380
1	60.0	c17-0280_20170508_01__893__283__961__341
1	60.0	c17-0280_20170508_01__779__756__830__793
1	60.0	c17-0280_20170508_01__373__681__433__735
1	59.0	c17-0280_20170508_01__1209__198__1259__236
1	59.0	c17-0280_20170508_01__519__505__580__557
1	58.0	c17-0280_20170508_01__332__317__396__370
1	58.0	c17-0280_20170508_01__1212__217__1256__259
1	58.0	c17-0280_20170508_01__843__526__906__578
1	58.0	c17-0280_20170508_01__188__236__237__276
1	58.0	c17-0280_20170508_01__133__583__199__644
1	58.0	c17-0280_20170508_01__1058__18__1115__65
1	57.0	c17-0280_20170508_01__-1__350__44__389
0	57.0	c17-0280_20170508_01__1091__32__1145__76
1	57.0	c17-0280_20170508_01__197__283__254__330
1	57.0	c17-0280_20170508_01__344__295__387__330
1	56.0	c17-0280_20170508_01__1031__660__1102__725
1	56.0	c17-0280_20170508_01__1105__320__1196__403
1	56.0	c17-0280_20170508_01__181__538__226__575
1	56.0	c17-0280_20170508_01__907__139__957__182
1	56.0	c17-0280_20170508_01__626__198__670__231
1	56.0	c17-0280_20170508_01__985__301__1038__346
1	56.0	c17-0280_20170508_01__657__521__730__587
0	55.0	c17-0280_20170508_01__982__240__1030__278
1	55.0	c17-0280_20170508_01__843__300__895__347
0	55.0	c17-0280_20170508_01__925__319__998__384
1	55.0	c17-0280_20170508_01__907__674__964__723
1	55.0	c17-0280_20170508_01__234__876__295__937
0	55.0	c17-0280_20170508_01__202__540__259__584
1	55.0	c17-0280_20170508_01__371__132__421__171
1	55.0	c17-0280_20170508_01__1194__93__1254__145
1	55.0	c17-0280_20170508_01__999__218__1048__259
1	55.0	c17-0280_20170508_01__710__546__770__596
1	54.0	c17-0280_20170508_01__321__565__396__635
0	54.0	c17-0280_20170508_01__1008__399__1130__530
0	54.0	c17-0280_20170508_01__239__598__302__654
1	54.0	c17-0280_20170508_01__591__165__662__225
0	54.0	c17-0280_20170508_01__65__131__135__194
0	54.0	c17-0280_20170508_01__417__739__483__795
0	53.0	c17-0280_20170508_01__399__694__467__747
1	53.0	c17-0280_20170508_01__713__626__773__675
1	53.0	c17-0280_20170508_01__646__-5__694__37
1	53.0	c17-0280_20170508_01__294__253__347__299
1	52.0	c17-0280_20170508_01__788__198__845__247
1	52.0	c17-0280_20170508_01__647__199__708__246
1	52.0	c17-0280_20170508_01__309__288__351__325
1	52.0	c17-0280_20170508_01__1212__146__1292__221
0	52.0	c17-0280_20170508_01__245__196__297__238
0	52.0	c17-0280_20170508_01__18__712__63__750
1	52.0	c17-0280_20170508_01__1153__811__1227__881
1	52.0	c17-0280_20170508_01__-5__74__37__116
1	52.0	c17-0280_20170508_01__9__518__51__551
1	52.0	c17-0280_20170508_01__611__581__682__646
1	52.0	c17-0280_20170508_01__660__388__726__449
1	52.0	c17-0280_20170508_01__950__574__1027__641
1	51.0	c17-0280_20170508_01__826__199__892__261
1	51.0	c17-0280_20170508_01__256__829__313__878
1	51.0	c17-0280_20170508_01__1003__-5__1055__27
0	51.0	c17-0280_20170508_01__712__74__776__125
1	51.0	c17-0280_20170508_01__574__725__612__758
0	51.0	c17-0280_20170508_01__748__762__794__799
1	51.0	c17-0280_20170508_01__1146__557__1228__632
0	51.0	c17-0280_20170508_01__1219__603__1282__659
1	51.0	c17-0280_20170508_01__-5__646__61__711
1	51.0	c17-0280_20170508_01__495__909__566__969
1	51.0	c17-0280_20170508_01__912__106__969__155
1	51.0	c17-0280_20170508_01__1232__626__1284__676
1	51.0	c17-0280_20170508_01__417__412__507__496
1	50.0	c17-0280_20170508_01__267__909__314__951
1	50.0	c17-0280_20170508_01__809__239__863__287
0	50.0	c17-0280_20170508_01__712__285__792__374
1	50.0	c17-0280_20170508_01__944__742__1007__789
1	50.0	c17-0280_20170508_01__276__558__333__610
1	50.0	c17-0280_20170508_01__800__595__864__657
1	50.0	c17-0280_20170508_01__98__565__174__632
1	50.0	c17-0280_20170508_01__1111__104__1161__143
1	49.0	c17-0280_20170508_01__422__391__478__447
1	49.0	c17-0280_20170508_01__809__103__875__168
0	49.0	c17-0280_20170508_01__1017__317__1074__368
1	49.0	c17-0280_20170508_01__781__53__865__123
1	49.0	c17-0280_20170508_01__374__342__434__396
1	49.0	c17-0280_20170508_01__1053__768__1126__838
1	49.0	c17-0280_20170508_01__380__871__446__932
1	49.0	c17-0280_20170508_01__523__550__576__594
1	49.0	c17-0280_20170508_01__664__650__728__703
1	48.0	c17-0280_20170508_01__788__281__835__320
1	48.0	c17-0280_20170508_01__921__632__1001__707
0	48.0	c17-0280_20170508_01__138__862__199__918
0	48.0	c17-0280_20170508_01__693__246__769__313
1	48.0	c17-0280_20170508_01__714__193__831__286
1	48.0	c17-0280_20170508_01__655__445__707__489
1	47.0	c17-0280_20170508_01__396__834__467__897
1	47.0	c17-0280_20170508_01__848__60__932__139
1	47.0	c17-0280_20170508_01__263__867__343__932
1	47.0	c17-0280_20170508_01__829__555__876__597
1	46.0	c17-0280_20170508_01__806__299__851__334
1	46.0	c17-0280_20170508_01__911__488__975__542
1	46.0	c17-0280_20170508_01__142__37__222__111
1	46.0	c17-0280_20170508_01__1101__181__1154__227
0	46.0	c17-0280_20170508_01__709__32__775__88
1	46.0	c17-0280_20170508_01__1123__721__1194__781
1	45.0	c17-0280_20170508_01__-3__228__65__289
0	45.0	c17-0280_20170508_01__624__712__686__766
1	45.0	c17-0280_20170508_01__718__808__824__911
0	45.0	c17-0280_20170508_01__133__252__196__301
0	45.0	c17-0280_20170508_01__111__392__176__450
1	45.0	c17-0280_20170508_01__121__349__170__393
0	44.0	c17-0280_20170508_01__1012__261__1060__294
1	44.0	c17-0280_20170508_01__852__493__918__544
0	44.0	c17-0280_20170508_01__1193__549__1245__591
1	44.0	c17-0280_20170508_01__1132__516__1209__586
1	44.0	c17-0280_20170508_01__1160__274__1214__318
1	44.0	c17-0280_20170508_01__264__328__332__387
1	43.0	c17-0280_20170508_01__273__113__345__176
0	43.0	c17-0280_20170508_01__167__647__237__707
0	43.0	c17-0280_20170508_01__110__169__174__223
1	43.0	c17-0280_20170508_01__403__174__469__235
1	43.0	c17-0280_20170508_01__568__546__657__625
1	43.0	c17-0280_20170508_01__624__279__671__311
1	43.0	c17-0280_20170508_01__1118__244__1175__291
1	43.0	c17-0280_20170508_01__1146__151__1212__211
1	42.0	c17-0280_20170508_01__655__804__744__885
1	42.0	c17-0280_20170508_01__1137__32__1189__74
1	42.0	c17-0280_20170508_01__110__849__152__886
1	42.0	c17-0280_20170508_01__104__437__154__480
0	42.0	c17-0280_20170508_01__669__899__744__965
0	42.0	c17-0280_20170508_01__517__265__602__337
0	42.0	c17-0280_20170508_01__312__325__354__358
0	41.0	c17-0280_20170508_01__1132__867__1212__946
0	40.0	c17-0280_20170508_01__761__460__831__516
0	57.0	c15-802_20150928_02__559__327__685__458
0	44.0	c15-802_20150928_02__312__862__392__927
0	42.0	c15-802_20150928_02__674__112__728__156
1	41.0	c15-802_20150928_02__206__818__272__871
0	40.0	c15-802_20150928_02__970__519__1027__568
0	40.0	c15-802_20150928_02__446__331__503__373
0	53.0	c18-0764_20181107_02__987__351__1051__411
0	52.0	c18-0764_20181107_02__1000__300__1085__382
0	44.0	c18-0764_20181107_02__555__374__613__425
0	40.0	c18-0764_20181107_02__559__410__611__452
0	52.0	c18-0420_20180627_01__206__308__307__394
0	50.0	c18-0420_20180627_01__925__598__991__654
0	45.0	c18-0420_20180627_01__998__164__1078__237
0	43.0	c18-0420_20180627_01__848__299__904__351
0	43.0	c18-0420_20180627_01__751__18__813__69
0	42.0	c18-0420_20180627_01__364__794__450__870
0	42.0	c18-0420_20180627_01__509__183__570__235
0	40.0	c18-0420_20180627_01__394__309__451__360
0	52.0	c20-0018_20200110_01__957__9__1028__69
1	47.0	c20-0018_20200110_01__1162__497__1245__575
1	43.0	c20-0018_20200110_01__192__51__263__125
1	41.0	c20-0018_20200110_01__1137__9__1226__88
1	49.0	c18-0662_20180920_01__1193__196__1264__261
1	46.0	c18-0662_20180920_01__347__834__406__885
1	57.0	c16-825_20161116_01__911__811__1010__906
1	49.0	c16-825_20161116_01__772__757__869__865
0	49.0	c16-825_20161116_01__528__558__611__641
0	47.0	c16-825_20161116_01__925__853__1010__932
0	46.0	c16-825_20161116_01__291__299__348__348
0	44.0	c16-825_20161116_01__783__890__847__939
0	42.0	c16-825_20161116_01__175__117__257__191
1	56.0	c15-808_20150930_01__705__327__787__394
0	40.0	c15-808_20150930_01__1067__655__1184__763
1	54.0	c18-0232_20180413_01__902__815__987__890
1	53.0	c18-0232_20180413_01__1188__326__1254__382
1	49.0	c18-0232_20180413_01__65__469__131__525
1	49.0	c18-0232_20180413_01__848__128__909__180
1	44.0	c18-0232_20180413_01__1188__374__1259__430
1	44.0	c18-0232_20180413_01__921__355__982__407
1	43.0	c18-0232_20180413_01__500__365__556__416
1	43.0	c18-0232_20180413_01__550__247__607__296
0	42.0	c18-0232_20180413_01__1008__755__1092__830
0	42.0	c18-0232_20180413_01__1085__773__1147__820
0	42.0	c18-0232_20180413_01__239__188__295__235
0	41.0	c18-0232_20180413_01__133__811__194__867
0	41.0	c18-0232_20180413_01__55__871__126__927
0	40.0	c18-0232_20180413_01__869__751__921__793
0	40.0	c18-0232_20180413_01__582__546__639__593
0	40.0	c18-0232_20180413_01__958__365__1029__425
0	40.0	c18-0232_20180413_01__991__848__1047__895
0	43.0	c18-0250_20180418_01__495__111__561__163
0	41.0	c18-0250_20180418_01__1095__111__1156__158
0	52.0	c17-0420_20170629_01__18__684__114__782
0	52.0	c17-0420_20170629_01__1106__387__1211__478
0	51.0	c17-0420_20170629_01__302__594__394__678
0	49.0	c17-0420_20170629_01__655__739__698__767
0	49.0	c17-0420_20170629_01__481__324__544__375
0	46.0	c17-0420_20170629_01__27__397__79__435
0	45.0	c17-0420_20170629_01__657__111__699__139
0	41.0	c17-0420_20170629_01__504__198__573__252
0	40.0	c17-0420_20170629_01__276__488__319__516
0	48.0	c15-0021_20150129_01__357__402__409__449
0	46.0	c15-0021_20150129_01__1198__604__1264__665
0	42.0	c16-606_20160817_01__176__65__237__116
0	46.0	c15-0617_20150716_01__941__442__1003__492
0	43.0	c16-229_20160411_01__819__179__918__268
0	40.0	c16-229_20160411_01__1179__651__1236__702
0	40.0	c16-229_20160411_01__1118__32__1184__93
0	54.0	c18-0871_20181221_01__563__591__634__659
0	40.0	c18-0871_20181221_01__869__649__926__691
0	40.0	c18-0871_20181221_01__949__239__996__281
0	40.0	c18-0871_20181221_01__622__146__670__188
0	57.0	c19-0837_20191016_01__403__904__455__941
0	47.0	c19-0837_20191016_01__582__179__653__239
0	43.0	c19-0837_20191016_01__773__604__853__711
0	53.0	c17-0472_20170727_01__119__537__204__607
0	42.0	c17-0472_20170727_01__1160__845__1219__899
0	42.0	c17-0472_20170727_01__874__269__935__321
0	41.0	c15-0653_20150731_02__347__165__418__225
0	50.0	c15-0165_20150311_01__481__255__589__358
0	47.0	c15-0165_20150311_01__521__283__592__344
0	46.0	c15-0165_20150311_01__86__674__162__744
0	44.0	c15-0165_20150311_01__289__551__339__588
0	57.0	c15-776_20150918_01__1085__51__1156__111
0	44.0	c15-776_20150918_01__1043__665__1109__716
0	44.0	c15-776_20150918_01__449__469__501__511
0	43.0	c15-776_20150918_01__446__712__542__806
0	40.0	c15-776_20150918_01__843__739__900__781
0	40.0	c15-776_20150918_01__51__299__140__365
0	40.0	c15-776_20150918_01__91__223__194__321
0	40.0	c15-776_20150918_01__96__160__162__216
0	53.0	c17-0676_20170928_01__37__876__89__927
0	52.0	c17-0676_20170928_01__83__503__135__547
0	46.0	c17-0676_20170928_01__959__596__1022__645
1	40.0	c17-0676_20170928_01__669__60__716__97
0	48.0	c15-0653_20150729_01__437__797__531__885
0	42.0	c18-0084_20180206_01__348__504__409__555
0	50.0	c18-0835_20181211_02__765__613__887__739
0	46.0	c18-0835_20181211_02__1101__18__1201__106
0	46.0	c18-0835_20181211_02__715__94__781__149
0	46.0	c18-0835_20181211_02__616__13__696__85
0	40.0	c18-0835_20181211_02__789__55__859__116
0	44.0	c17-0607_20170907_01__537__588__589__635
0	40.0	c17-0607_20170907_01__568__588__620__630
0	45.0	c15-700_20150817_01__956__593__1004__625
0	44.0	c15-700_20150817_01__495__183__552__235
0	43.0	c15-700_20150817_01__1100__544__1152__595
0	42.0	c17-0472_20170727_02__109__146__203__239
0	42.0	c17-0472_20170727_02__263__20__334__88
0	40.0	c17-0472_20170727_02__180__379__264__458
0	42.0	c15-0117_20150211_01__719__623__794__693
0	42.0	c15-0117_20150211_01__100__232__208__377
0	40.0	c15-0117_20150211_01__1142__332__1226__411

## Sheet: External_Test
1=true	possibility	image ID and location (last 4 values)
0	62.0	c18-0785_20181114_01__1118__279__1184__330
0	58.0	c18-0785_20181114_01__905__194__964__245
0	57.0	c18-0785_20181114_01__367__705__442__769
0	54.0	c18-0785_20181114_01__348__688__409__737
0	48.0	c18-0785_20181114_01__1198__409__1254__460
0	47.0	c18-0785_20181114_01__785__174__860__244
0	45.0	c18-0785_20181114_01__1069__712__1135__773
0	45.0	c18-0785_20181114_01__403__704__479__769
0	44.0	c18-0785_20181114_01__504__474__556__516
0	44.0	c18-0785_20181114_01__174__346__263__425
0	44.0	c18-0785_20181114_01__838__839__895__881
0	42.0	c18-0785_20181114_01__440__694__496__738
0	42.0	c18-0785_20181114_01__961__807__1022__858
0	42.0	c18-0785_20181114_01__358__597__429__658
0	41.0	c18-0785_20181114_01__248__299__323__365
0	41.0	c18-0785_20181114_01__1230__330__1282__386
0	41.0	c18-0785_20181114_01__472__820__524__867
0	40.0	c18-0785_20181114_01__343__735__395__781
0	40.0	c18-0785_20181114_01__688__719__756__780
0	42.0	c15-0520_20150617_01__632__788__716__863
0	42.0	c19-1026_20191218_01__1151__144__1194__177
0	43.0	c17-0605_20170911_01__307__713__392__788
0	43.0	c17-0605_20170911_01__23__303__86__359
0	41.0	c17-0605_20170911_01__733__885__808__941
0	41.0	c17-0605_20170911_01__683__600__765__678
0	41.0	c17-0605_20170911_01__422__179__502__249
0	56.0	c17-0934_20171222_01__147__-5__204__37
0	47.0	c16-547_20160726_01__1130__39__1193__93
0	58.0	c17-0412_20170629_01__460__828__501__856
0	55.0	c17-0412_20170629_01__114__724__179__782
0	54.0	c17-0412_20170629_01__579__240__629__282
0	48.0	c17-0412_20170629_01__369__455__414__488
0	47.0	c17-0412_20170629_01__587__424__653__487
0	47.0	c17-0412_20170629_01__171__313__265__395
0	46.0	c17-0412_20170629_01__1065__225__1105__253
0	44.0	c17-0412_20170629_01__801__4__918__144
0	43.0	c17-0412_20170629_01__1160__499__1207__532
0	43.0	c17-0412_20170629_01__1076__488__1151__591
0	42.0	c17-0412_20170629_01__1113__469__1189__535
0	42.0	c17-0412_20170629_01__173__613__258__683
0	42.0	c17-0412_20170629_01__751__393__841__467
0	41.0	c17-0412_20170629_01__467__246__538__330
0	41.0	c17-0412_20170629_01__1127__532__1207__611
0	40.0	c17-0412_20170629_01__577__469__671__558
0	40.0	c17-0412_20170629_01__641__351__721__435
0	53.0	c18-0786_20181114_01__258__674__320__725
0	48.0	c18-0786_20181114_01__655__355__726__416
0	46.0	c18-0786_20181114_01__446__560__512__616
1	46.0	c18-0786_20181114_01__1090__369__1151__425
0	45.0	c18-0786_20181114_01__1139__867__1242__960
1	45.0	c18-0786_20181114_01__158__200__227__264
0	44.0	c18-0786_20181114_01__191__197__251__253
0	44.0	c18-0786_20181114_01__749__505__808__554
0	44.0	c18-0786_20181114_01__643__698__726__775
0	42.0	c18-0786_20181114_01__215__127__277__179
0	42.0	c18-0786_20181114_01__953__822__1013__874
0	41.0	c18-0786_20181114_01__270__467__327__516
0	41.0	c18-0786_20181114_01__1068__236__1125__282
0	41.0	c18-0786_20181114_01__276__4__351__65
0	40.0	c18-0786_20181114_01__925__479__987__535
0	40.0	c18-0786_20181114_01__568__904__620__946
0	40.0	c18-0786_20181114_01__604__583__665__639
0	40.0	c18-0786_20181114_01__984__221__1041__277
0	40.0	c18-0786_20181114_01__403__787__465__839
0	42.0	c17-0839_20171117_01__895__204__969__271
0	42.0	c16-347_20160524_01__440__434__520__511
0	47.0	c15-0326_20150422_01__911__294__968__342
0	44.0	c16-120_20160225_01__568__210__643__273
0	67.0	c19-0630_20190731_01__-5__801__70__871
1	67.0	c19-0630_20190731_01__1207__55__1278__121
1	65.0	c19-0630_20190731_01__32__451__117__535
0	53.0	c19-0630_20190731_01__1174__108__1256__181
1	51.0	c19-0630_20190731_01__954__205__1017__262
0	50.0	c19-0630_20190731_01__765__13__827__69
0	50.0	c19-0630_20190731_01__252__232__336__305
0	49.0	c19-0630_20190731_01__734__820__811__890
1	46.0	c19-0630_20190731_01__925__603__996__666
0	45.0	c19-0630_20190731_01__813__151__874__202
0	44.0	c19-0630_20190731_01__872__885__952__951
0	43.0	c19-0630_20190731_01__563__899__620__946
0	42.0	c19-0630_20190731_01__74__722__145__784
0	42.0	c19-0630_20190731_01__756__-5__813__41
0	42.0	c19-0630_20190731_01__231__396__311__464
0	41.0	c19-0630_20190731_01__710__219__789__293
0	40.0	c19-0630_20190731_01__662__598__737__673
0	40.0	c19-0630_20190731_01__9__739__65__791
0	45.0	c18-0626_20180912_01__587__122__650__173
0	42.0	c18-0626_20180912_01__424__726__509__793
0	40.0	c18-0626_20180912_01__138__867__222__932
0	46.0	c18-0710_20181016_01__546__336__605__390
0	43.0	c18-0886_20181227_01__619__27__695__97
0	40.0	c18-0886_20181227_01__587__27__662__107
0	45.0	c19-0534_20190703_01__1118__113__1214__195
1	46.0	c19-0331_20190510_02__719__396__781__449
0	41.0	c19-0331_20190510_02__518__651__580__702
0	51.0	c18-0340_20180521_01__336__738__404__796
1	71.0	c17-0069_20170125_01__519__260__616__351
1	59.0	c17-0069_20170125_01__817__705__916__791
0	53.0	c17-0069_20170125_01__368__414__453__482
0	47.0	c17-0069_20170125_01__323__414__401__484
0	45.0	c17-0069_20170125_01__1146__693__1268__800
0	42.0	c17-0069_20170125_01__89__532__179__611
0	41.0	c17-0069_20170125_01__911__399__1019__493
0	48.0	c17-0275_20170505_01__549__739__621__803
0	48.0	c17-0275_20170505_01__286__306__357__364
0	46.0	c17-0275_20170505_01__991__695__1048__742
0	43.0	c17-0275_20170505_01__1008__778__1088__862
0	41.0	c17-0275_20170505_01__225__27__286__79
0	40.0	c17-0275_20170505_01__980__509__1039__560
0	42.0	c17-0245_20170419_01__991__815__1043__862
0	55.0	c17-0920_20171219_01__741__325__790__365
1	74.0	c17-0188_20170322_01__747__160__817__225
0	56.0	c17-0188_20170322_01__1085__203__1147__254
0	51.0	c17-0188_20170322_01__811__269__872__321
0	49.0	c17-0188_20170322_01__536__537__596__586
0	48.0	c17-0188_20170322_01__1015__367__1111__451
0	47.0	c17-0188_20170322_01__971__196__1020__236
0	44.0	c17-0188_20170322_01__779__331__836__376
0	43.0	c17-0188_20170322_01__780__512__877__598
0	42.0	c17-0188_20170322_01__1053__402__1109__444
0	51.0	c15-0122_20150215_01__986__86__1094__196
0	49.0	c15-0122_20150215_01__688__801__772__876
0	41.0	c15-0122_20150215_01__1037__41__1117__127
0	40.0	c19-0483_20190620_01__820__676__879__725
0	61.0	c17-0501_20170808_01__1170__255__1268__358
0	42.0	c17-0501_20170808_01__343__227__395__274
0	48.0	c18-0461_20180712_01__573__296__629__340
1	41.0	c18-0461_20180712_01__1190__236__1247__292
1	41.0	c18-0461_20180712_01__1190__236__1247__292
1	41.0	c18-0461_20180712_01__1190__236__1247__292
0	54.0	c16-205_20160330_01__655__51__721__107
0	47.0	c16-205_20160330_01__600__376__661__435
0	45.0	c16-205_20160330_01__474__381__531__427
0	44.0	c16-205_20160330_01__506__414__561__459
0	41.0	c16-205_20160330_01__256__423__308__465
0	41.0	c16-205_20160330_01__500__388__552__435
0	42.0	c18-0004_20180105_01__326__142__382__192
0	41.0	c18-0004_20180105_01__883__179__954__244
0	54.0	c16-21_20160114_01__1017__193__1088__258
0	53.0	c19-0513_20190627_01__554__393__620__453
0	45.0	c19-0513_20190627_01__1059__764__1116__809
0	45.0	c19-0513_20190627_01__650__579__712__635
0	42.0	c19-0513_20190627_01__345__643__446__748
0	42.0	c19-0513_20190627_01__124__418__227__502
0	40.0	c16-341_20160523_01__956__704__1022__765
0	40.0	c16-341_20160523_01__702__165__786__244
0	45.0	c15-891_20151105_01__660__188__712__235
0	42.0	c15-891_20151105_01__1014__608__1104__696
0	41.0	c15-891_20151105_01__377__857__438__909
0	40.0	c15-891_20151105_01__504__699__566__751
0	62.0	c17-0010_20170106_01__1193__867__1264__932
0	59.0	c17-0010_20170106_01__225__483__291__539
0	57.0	c17-0010_20170106_01__980__773__1042__822
0	57.0	c17-0010_20170106_01__184__429__246__482
0	55.0	c17-0010_20170106_01__321__13__387__69
0	54.0	c17-0010_20170106_01__117__301__181__359
0	53.0	c17-0010_20170106_01__497__759__561__813
0	53.0	c17-0010_20170106_01__280__438__337__484
0	52.0	c17-0010_20170106_01__628__281__696__341
0	51.0	c17-0010_20170106_01__1067__60__1126__109
0	51.0	c17-0010_20170106_01__1076__848__1151__913
0	50.0	c17-0010_20170106_01__532__517__594__568
0	50.0	c17-0010_20170106_01__604__198__661__246
0	50.0	c17-0010_20170106_01__1066__433__1126__484
0	50.0	c17-0010_20170106_01__348__436__410__485
0	49.0	c17-0010_20170106_01__128__408__190__464
0	49.0	c17-0010_20170106_01__891__824__955__876
0	48.0	c17-0010_20170106_01__208__720__266__767
0	48.0	c17-0010_20170106_01__481__204__547__260
0	48.0	c17-0010_20170106_01__232__62__293__113
0	48.0	c17-0010_20170106_01__963__245__1021__289
0	47.0	c17-0010_20170106_01__793__524__860__580
0	47.0	c17-0010_20170106_01__241__210__302__263
0	47.0	c17-0010_20170106_01__167__57__226__107
0	47.0	c17-0010_20170106_01__522__34__583__79
0	47.0	c17-0010_20170106_01__403__32__465__93
0	47.0	c17-0010_20170106_01__1132__665__1193__716
0	47.0	c17-0010_20170106_01__916__646__982__711
0	46.0	c17-0010_20170106_01__307__451__368__502
0	46.0	c17-0010_20170106_01__994__488__1060__539
0	45.0	c17-0010_20170106_01__1118__551__1189__611
0	45.0	c17-0010_20170106_01__664__757__732__818
0	45.0	c17-0010_20170106_01__550__340__602__382
0	45.0	c17-0010_20170106_01__1096__150__1151__194
0	45.0	c17-0010_20170106_01__361__65__423__116
0	45.0	c17-0010_20170106_01__913__719__986__780
0	45.0	c17-0010_20170106_01__456__623__517__673
0	45.0	c17-0010_20170106_01__261__519__318__564
0	44.0	c17-0010_20170106_01__91__74__148__121
0	44.0	c17-0010_20170106_01__350__251__421__309
0	44.0	c17-0010_20170106_01__1037__413__1097__465
0	44.0	c17-0010_20170106_01__1073__641__1145__697
0	44.0	c17-0010_20170106_01__820__-1__890__60
0	43.0	c17-0010_20170106_01__765__341__841__411
0	43.0	c17-0010_20170106_01__-5__815__61__871
0	43.0	c17-0010_20170106_01__243__436__305__487
0	43.0	c17-0010_20170106_01__990__653__1056__711
0	43.0	c17-0010_20170106_01__299__109__356__155
0	43.0	c17-0010_20170106_01__290__83__347__125
0	43.0	c17-0010_20170106_01__735__231__794__282
0	43.0	c17-0010_20170106_01__799__132__863__185
0	43.0	c17-0010_20170106_01__384__312__443__362
0	42.0	c17-0010_20170106_01__1184__27__1259__93
0	42.0	c17-0010_20170106_01__871__193__928__235
0	42.0	c17-0010_20170106_01__628__876__684__923
0	42.0	c17-0010_20170106_01__782__183__853__244
0	42.0	c17-0010_20170106_01__939__787__996__829
0	42.0	c17-0010_20170106_01__1165__202__1221__246
0	42.0	c17-0010_20170106_01__1039__579__1096__621
0	42.0	c17-0010_20170106_01__192__565__258__616
0	42.0	c17-0010_20170106_01__780__465__832__507
0	42.0	c17-0010_20170106_01__674__383__730__435
0	42.0	c17-0010_20170106_01__1022__222__1080__270
0	41.0	c17-0010_20170106_01__695__773__763__831
0	41.0	c17-0010_20170106_01__448__820__505__871
0	41.0	c17-0010_20170106_01__435__136__494__187
0	41.0	c17-0010_20170106_01__761__283__813__330
0	41.0	c17-0010_20170106_01__37__346__107__402
0	41.0	c17-0010_20170106_01__710__265__776__320
0	41.0	c17-0010_20170106_01__23__209__84__260
0	41.0	c17-0010_20170106_01__1123__151__1182__202
0	40.0	c17-0010_20170106_01__326__255__392__316
0	40.0	c17-0010_20170106_01__529__594__581__631
0	40.0	c17-0010_20170106_01__100__839__157__891
0	40.0	c17-0010_20170106_01__1085__188__1142__235
0	40.0	c17-0010_20170106_01__695__88__733__121
0	43.0	c19-0490_20190620_01__810__713__923__835
0	42.0	c19-0490_20190620_01__963__316__1015__363
0	42.0	c17-0017_20170109_01__478__494__538__547
0	46.0	c17-0824_20171114_01__255__547__336__622
0	43.0	c17-0824_20171114_01__1021__634__1098__701
1	41.0	c19-0455_20190613_01__18__341__84__402
0	54.0	c15-0362_20150429_01__910__422__1002__506
0	51.0	c15-0362_20150429_01__987__55__1051__109
0	48.0	c15-0362_20150429_01__944__518__1015__583
0	43.0	c15-0362_20150429_01__582__218__648__274
0	41.0	c15-0362_20150429_01__1085__604__1147__655
0	40.0	c15-0362_20150429_01__970__95__1046__160
0	52.0	c16-833_20161117_02__1108__399__1180__463
0	50.0	c16-833_20161117_02__834__55__895__111
0	49.0	c16-833_20161117_02__962__262__1018__311
0	49.0	c16-833_20161117_02__950__541__1010__592
0	46.0	c16-833_20161117_02__601__127__657__176
0	45.0	c16-833_20161117_02__930__269__991__321
0	45.0	c16-833_20161117_02__181__760__247__816
0	45.0	c16-833_20161117_02__770__299__841__360
0	45.0	c16-833_20161117_02__690__712__743__755
0	44.0	c16-833_20161117_02__1073__399__1125__445
0	44.0	c16-833_20161117_02__648__288__700__332
0	44.0	c16-833_20161117_02__126__100__182__147
0	44.0	c16-833_20161117_02__674__853__749__918
0	44.0	c16-833_20161117_02__1052__603__1110__652
0	44.0	c16-833_20161117_02__426__4__480__53
0	44.0	c16-833_20161117_02__532__806__608__871
0	44.0	c16-833_20161117_02__870__145__930__195
0	43.0	c16-833_20161117_02__646__350__699__392
0	43.0	c16-833_20161117_02__142__205__210__264
0	43.0	c16-833_20161117_02__891__311__947__359
0	42.0	c16-833_20161117_02__253__41__323__107
0	42.0	c16-833_20161117_02__862__492__921__540
0	42.0	c16-833_20161117_02__777__139__830__185
0	42.0	c16-833_20161117_02__705__246__769__299
0	41.0	c16-833_20161117_02__1104__909__1156__951
0	41.0	c16-833_20161117_02__888__551__940__597
0	41.0	c16-833_20161117_02__1045__688__1130__763
0	41.0	c16-833_20161117_02__678__222__737__268
0	41.0	c16-833_20161117_02__1017__518__1074__560
0	41.0	c16-833_20161117_02__870__-5__927__41
0	41.0	c16-833_20161117_02__838__131__895__178
0	40.0	c16-833_20161117_02__254__733__310__780
0	40.0	c16-833_20161117_02__622__330__674__372
0	40.0	c16-833_20161117_02__1179__4__1236__51
0	40.0	c16-833_20161117_02__1085__465__1137__511
0	40.0	c16-833_20161117_02__347__160__418__221
0	40.0	c16-833_20161117_02__678__183__735__235
0	40.0	c16-833_20161117_02__352__525__409__567
0	40.0	c16-833_20161117_02__902__98__970__159
0	47.0	c18-0204_20180330_01__124__51__199__130
1	66.0	c17-0105_20170216_01__690__289__787__376
0	61.0	c17-0105_20170216_01__1095__569__1142__611
0	55.0	c17-0105_20170216_01__925__193__977__239
0	53.0	c17-0105_20170216_01__312__834__361__876
0	52.0	c17-0105_20170216_01__612__728__666__770
0	50.0	c17-0105_20170216_01__824__696__895__764
0	49.0	c17-0105_20170216_01__921__165__982__216
0	49.0	c17-0105_20170216_01__932__199__960__232
0	47.0	c17-0105_20170216_01__87__11__153__71
1	47.0	c17-0105_20170216_01__1080__141__1140__191
0	46.0	c17-0105_20170216_01__229__712__274__750
0	46.0	c17-0105_20170216_01__95__554__138__590
0	45.0	c17-0105_20170216_01__1198__583__1264__635
0	44.0	c17-0105_20170216_01__563__9__625__65
0	44.0	c17-0105_20170216_01__956__704__1004__741
0	44.0	c17-0105_20170216_01__1067__579__1109__611
0	44.0	c17-0105_20170216_01__263__405__320__456
0	43.0	c17-0105_20170216_01__777__518__836__568
0	43.0	c17-0105_20170216_01__428__188__492__249
0	42.0	c17-0105_20170216_01__970__339__1018__377
0	42.0	c17-0105_20170216_01__966__460__1041__525
0	41.0	c17-0105_20170216_01__756__125__803__163
0	41.0	c17-0105_20170216_01__730__135__786__186
0	41.0	c19-0436_20190605_01__605__346__681__421
1	66.0	c17-0810_20171108_01__27__23__89__74
0	46.0	c17-0810_20171108_01__1031__122__1076__159
0	44.0	c17-0810_20171108_01__1166__391__1221__441
0	43.0	c17-0810_20171108_01__765__881__808__913
0	58.0	c16-202_20160330_01__696__267__759__321
0	54.0	c16-202_20160330_01__1193__260__1264__321
0	51.0	c16-202_20160330_01__326__809__392__867
0	47.0	c16-202_20160330_01__606__731__669__787
0	47.0	c16-202_20160330_01__1058__565__1119__618
0	46.0	c16-202_20160330_01__957__376__1028__441
0	45.0	c16-202_20160330_01__436__365__502__421
0	45.0	c16-202_20160330_01__911__193__982__253
0	44.0	c16-202_20160330_01__1109__283__1180__349
0	44.0	c16-202_20160330_01__1172__800__1268__881
0	44.0	c16-202_20160330_01__602__457__661__509
0	43.0	c16-202_20160330_01__105__394__213__489
0	43.0	c16-202_20160330_01__1012__325__1078__386
0	42.0	c16-202_20160330_01__260__469__298__544
0	42.0	c16-202_20160330_01__646__801__707__860
0	42.0	c16-202_20160330_01__316__351__424__444
0	42.0	c16-202_20160330_01__550__13__604__55
0	41.0	c16-202_20160330_01__291__48__349__99
0	40.0	c16-202_20160330_01__335__537__410__602
0	40.0	c16-202_20160330_01__869__504__926__555
0	40.0	c16-202_20160330_01__371__699__427__744
0	40.0	c16-202_20160330_01__173__727__216__793
0	41.0	c19-0288_20190424_01__307__867__378__932
0	47.0	c19-0194_20190320_01__1151__255__1240__344
0	45.0	c19-0194_20190320_01__756__769__813__815
0	45.0	c19-0194_20190320_01__403__118__483__216
0	45.0	c19-0194_20190320_01__-5__51__42__97
0	44.0	c19-0194_20190320_01__875__625__931__671
0	44.0	c19-0194_20190320_01__125__560__177__602
0	42.0	c19-0194_20190320_01__32__750__119__832
0	42.0	c19-0194_20190320_01__1167__233__1240__292
0	42.0	c19-0194_20190320_01__1036__99__1092__146
0	42.0	c19-0194_20190320_01__815__217__869__264
0	41.0	c19-0194_20190320_01__142__527__199__574
0	41.0	c19-0194_20190320_01__243__-5__300__46
0	40.0	c19-0194_20190320_01__702__237__758__288
0	52.0	c16-768_20161031_01__446__386__500__428
0	46.0	c16-768_20161031_01__699__704__755__748
0	46.0	c16-768_20161031_01__765__346__831__407
0	44.0	c16-768_20161031_01__490__815__556__879
0	42.0	c16-768_20161031_01__1071__318__1128__365
0	41.0	c16-768_20161031_01__587__249__648__295
0	44.0	c16-357_20160525_01__829__801__886__853
0	48.0	c19-0205_20190322_01__1094__799__1166__870
0	42.0	c19-0205_20190322_01__897__595__954__646
0	40.0	c19-0205_20190322_01__737__224__794__270
0	64.0	c17-0488_20170804_01__705__311__770__365
0	56.0	c17-0488_20170804_01__816__53__863__90
0	53.0	c17-0488_20170804_01__797__303__843__340
0	53.0	c17-0488_20170804_01__-7__654__42__696
0	51.0	c17-0488_20170804_01__260__148__306__185
0	49.0	c17-0488_20170804_01__715__76__767__121
0	49.0	c17-0488_20170804_01__890__145__937__181
0	49.0	c17-0488_20170804_01__669__345__716__380
0	48.0	c17-0488_20170804_01__481__218__519__246
0	47.0	c17-0488_20170804_01__266__862__308__897
0	46.0	c17-0488_20170804_01__107__392__163__437
0	46.0	c17-0488_20170804_01__161__4__204__37
0	46.0	c17-0488_20170804_01__838__644__890__686
0	45.0	c17-0488_20170804_01__1051__267__1105__316
0	45.0	c17-0488_20170804_01__972__330__1015__367
0	45.0	c17-0488_20170804_01__253__483__300__521
0	45.0	c17-0488_20170804_01__954__32__992__60
0	44.0	c17-0488_20170804_01__451__94__512__141
0	42.0	c17-0488_20170804_01__346__415__385__446
0	42.0	c17-0488_20170804_01__9__269__56__307
0	42.0	c17-0488_20170804_01__1169__9__1207__37
0	42.0	c17-0488_20170804_01__1216__623__1259__655
0	41.0	c17-0488_20170804_01__676__505__730__550
0	41.0	c17-0488_20170804_01__710__144__771__200
0	41.0	c17-0488_20170804_01__481__660__538__707
0	40.0	c17-0488_20170804_01__1022__397__1078__444
0	40.0	c17-0488_20170804_01__229__635__272__667
0	40.0	c17-0488_20170804_01__1128__759__1184__806
0	40.0	c17-0339_20170525_01__1054__432__1130__516
1	57.0	c15-0099_20150205_01__811__-5__872__43
1	54.0	c15-0099_20150205_01__865__4__936__69
0	47.0	c15-0099_20150205_01__430__136__474__173
0	45.0	c15-0099_20150205_01__298__116__373__186
1	42.0	c15-0099_20150205_01__316__313__443__444
0	40.0	c15-0099_20150205_01__82__155__138__202
0	40.0	c18-0598_20180905_01__897__65__973__130
0	40.0	c18-0598_20180905_01__298__41__378__121
1	49.0	C14-991_20140925_01__309__698__389__773
0	46.0	c17-0942_20171228_01__952__555__1013__607
0	50.0	c17-0243_20170417_02__285__465__337__507
0	48.0	c17-0243_20170417_02__1212__504__1254__537
0	46.0	c17-0243_20170417_02__293__338__359__396
0	45.0	c17-0243_20170417_02__357__423__418__479
0	62.0	c16-450_20160627_01__893__251__959__311
0	57.0	c16-450_20160627_01__852__422__902__459
0	55.0	c16-450_20160627_01__1002__653__1048__690
0	53.0	c16-450_20160627_01__263__535__308__572
0	51.0	c16-450_20160627_01__488__626__544__675
0	51.0	c16-450_20160627_01__879__423__925__455
0	50.0	c16-450_20160627_01__610__707__664__755
0	50.0	c16-450_20160627_01__284__519__332__554
0	48.0	c16-450_20160627_01__389__283__474__356
0	47.0	c16-450_20160627_01__1061__325__1125__378
0	45.0	c16-450_20160627_01__1172__641__1223__683
0	45.0	c16-450_20160627_01__543__476__602__525
0	45.0	c16-450_20160627_01__111__393__154__425
0	44.0	c16-450_20160627_01__245__508__302__554
0	40.0	c16-450_20160627_01__394__395__451__437
1	55.0	c19-0255_20190415_01__980__355__1067__432
0	53.0	c19-0255_20190415_01__778__374__844__435
0	44.0	c19-0255_20190415_01__431__770__498__829
0	41.0	c19-0255_20190415_01__1174__825__1223__862
1	54.0	c18-0208_20180330_01__1031__436__1105__503
0	46.0	c18-0208_20180330_01__683__297__744__358
0	46.0	c18-0208_20180330_01__1061__211__1120__260
0	46.0	c18-0208_20180330_01__803__127__878__197
0	43.0	c18-0208_20180330_01__318__293__382__351
0	42.0	c18-0208_20180330_01__307__598__398__678
0	42.0	c18-0208_20180330_01__1095__431__1165__494
0	42.0	c18-0208_20180330_01__874__329__938__386
0	41.0	c18-0208_20180330_01__23__455__84__507
0	41.0	c18-0208_20180330_01__514__174__570__221
0	55.0	c17-0171_20170313_01__27__526__91__577
1	53.0	c17-0171_20170313_01__818__333__874__387
0	51.0	c17-0171_20170313_01__619__325__668__365
1	50.0	c17-0171_20170313_01__956__379__1013__435
0	44.0	c17-0171_20170313_01__946__534__1008__588
0	44.0	c17-0171_20170313_01__843__343__902__392
0	43.0	c17-0171_20170313_01__197__113__239__151
0	42.0	c17-0171_20170313_01__260__344__308__386
0	41.0	c17-0171_20170313_01__490__355__542__402
0	40.0	c17-0171_20170313_01__1048__323__1105__369
0	52.0	c20-0040_20200121_02__439__551__496__597
0	47.0	c20-0040_20200121_02__720__18__782__74
0	46.0	c20-0040_20200121_02__220__331__272__373
0	45.0	c20-0040_20200121_02__469__69__530__121
0	43.0	c20-0040_20200121_02__432__588__487__635
0	41.0	c20-0040_20200121_02__114__746__171__793
0	41.0	c20-0040_20200121_02__472__483__527__539
0	41.0	c20-0040_20200121_02__803__179__869__239
0	55.0	c15-0637_20150723_01__1072__114__1121__155
0	54.0	c15-0637_20150723_01__434__508__474__540
0	52.0	c15-0637_20150723_01__529__510__588__560
0	48.0	c15-0637_20150723_01__399__565__441__597
0	45.0	c15-0637_20150723_01__761__739__803__772
0	45.0	c15-0637_20150723_01__372__497__415__530
0	44.0	c15-0637_20150723_01__60__646__126__716
0	43.0	c15-0637_20150723_01__152__703__234__784
0	43.0	c15-0637_20150723_01__368__527__406__555
0	41.0	c15-0637_20150723_01__641__843__690__885
0	54.0	c19-0789_20190927_03__439__118__589__239
0	42.0	c19-0789_20190927_03__680__830__756__893
0	47.0	c19-0649_20190809_01__769__784__870__864
0	42.0	c19-0649_20190809_01__859__311__927__371
0	41.0	c19-0649_20190809_01__591__330__648__377
0	40.0	c19-0649_20190809_01__935__627__1005__693
0	40.0	c19-0649_20190809_01__253__679__309__725
1	58.0	c15-675_20150807_01__655__198__732__270
0	45.0	c15-675_20150807_01__86__297__129__363
0	40.0	c15-675_20150807_01__1104__437__1142__511
0	50.0	c17-0854_20171123_01__18__127__154__230
0	44.0	c17-0854_20171123_01__380__322__460__393
0	42.0	c17-0854_20171123_01__706__293__777__353
0	41.0	c17-0854_20171123_01__497__308__566__361
0	45.0	c-15-816_20151010_01__307__825__392__909
0	44.0	c-15-816_20151010_01__587__105__648__154
0	43.0	c-15-816_20151010_01__238__773__322__849
0	43.0	c-15-816_20151010_01__778__555__839__616
0	43.0	c-15-816_20151010_01__805__124__871__193
0	43.0	c-15-816_20151010_01__260__98__317__142
0	41.0	c-15-816_20151010_01__250__422__311__478
1	72.0	c16-586_20160809_01__705__491__783__560
1	69.0	c16-586_20160809_01__524__355__597__418
0	48.0	c16-586_20160809_01__1025__169__1105__244
0	60.0	c18-0056_20180129_01__239__-1__291__37
0	59.0	c18-0056_20180129_01__1026__683__1074__721
0	58.0	c18-0056_20180129_01__102__738__163__787
0	56.0	c18-0056_20180129_01__435__683__492__730
0	56.0	c18-0056_20180129_01__500__204__556__255
0	55.0	c18-0056_20180129_01__538__214__585__255
0	52.0	c18-0056_20180129_01__51__41__98__79
0	52.0	c18-0056_20180129_01__927__815__996__881
0	50.0	c18-0056_20180129_01__1106__520__1163__568
0	49.0	c18-0056_20180129_01__935__696__1019__777
0	49.0	c18-0056_20180129_01__820__165__909__239
0	46.0	c18-0056_20180129_01__485__98__544__152
0	46.0	c18-0056_20180129_01__869__569__921__611
0	46.0	c18-0056_20180129_01__820__890__890__951
0	46.0	c18-0056_20180129_01__32__645__89__692
0	45.0	c18-0056_20180129_01__478__799__544__860
0	45.0	c18-0056_20180129_01__316__494__392__564
0	44.0	c18-0056_20180129_01__1064__811__1111__848
0	44.0	c18-0056_20180129_01__1174__435__1250__495
0	44.0	c18-0056_20180129_01__243__811__302__860
0	43.0	c18-0056_20180129_01__855__762__946__858
0	41.0	c18-0056_20180129_01__695__407__766__467
0	41.0	c18-0056_20180129_01__417__588__502__672
0	40.0	c18-0056_20180129_01__1142__632__1222__697
0	67.0	c16-943_20161228_01__776__657__849__718
0	59.0	c16-943_20161228_01__633__694__708__764
0	58.0	c16-943_20161228_01__980__279__1042__330
0	56.0	c16-943_20161228_01__1207__811__1280__876
0	55.0	c16-943_20161228_01__819__505__887__564
0	55.0	c16-943_20161228_01__1072__401__1154__483
0	54.0	c16-943_20161228_01__1012__283__1074__335
0	54.0	c16-943_20161228_01__1076__100__1153__173
0	54.0	c16-943_20161228_01__142__904__204__960
0	52.0	c16-943_20161228_01__-5__55__56__111
0	49.0	c16-943_20161228_01__531__614__596__671
0	49.0	c16-943_20161228_01__705__665__771__720
0	48.0	c16-943_20161228_01__824__699__886__746
0	47.0	c16-943_20161228_01__1085__660__1142__707
0	47.0	c16-943_20161228_01__1191__540__1256__594
0	44.0	c16-943_20161228_01__1022__632__1097__693
0	44.0	c16-943_20161228_01__282__828__342__877
0	44.0	c16-943_20161228_01__1207__451__1273__502
0	43.0	c16-943_20161228_01__632__643__689__688
0	43.0	c16-943_20161228_01__601__699__657__746
0	43.0	c16-943_20161228_01__697__835__756__883
0	43.0	c16-943_20161228_01__930__340__982__382
0	42.0	c16-943_20161228_01__187__41__253__97
0	42.0	c16-943_20161228_01__891__306__956__364
0	42.0	c16-943_20161228_01__18__607__135__691
0	42.0	c16-943_20161228_01__542__502__594__549
0	41.0	c16-943_20161228_01__885__488__942__535
0	41.0	c16-943_20161228_01__1067__511__1119__553
0	41.0	c16-943_20161228_01__785__700__832__740
0	41.0	c16-943_20161228_01__522__727__579__776
0	41.0	c16-943_20161228_01__880__764__942__811
0	40.0	c16-943_20161228_01__1113__199__1175__251
0	40.0	c16-943_20161228_01__55__469__112__516
1	66.0	c17-0770_20171030_01__1221__825__1278__876
0	58.0	c17-0770_20171030_01__733__274__808__339
0	58.0	c17-0770_20171030_01__989__117__1064__187
0	55.0	c17-0770_20171030_01__779__269__836__321
0	48.0	c17-0770_20171030_01__204__455__273__520
0	47.0	c17-0770_20171030_01__389__32__465__107
0	47.0	c17-0770_20171030_01__782__637__858__707
0	45.0	c17-0770_20171030_01__688__4__744__55
0	45.0	c17-0770_20171030_01__965__238__1029__294
0	43.0	c17-0770_20171030_01__74__118__145__188
0	43.0	c17-0770_20171030_01__172__722__234__776
0	42.0	c17-0770_20171030_01__272__596__331__647
0	41.0	c17-0770_20171030_01__1083__610__1186__705
0	41.0	c17-0770_20171030_01__79__493__140__549
0	40.0	c17-0770_20171030_01__869__843__926__890
0	40.0	c17-0770_20171030_01__46__335__103__386
0	40.0	c17-0770_20171030_01__674__565__749__639
0	40.0	c17-0770_20171030_01__1146__416__1217__481
0	48.0	c16-109_20160222_01__976__729__1038__780
0	45.0	c16-109_20160222_01__517__255__585__316
0	43.0	c16-109_20160222_01__969__498__1026__545
0	41.0	c16-109_20160222_01__1074__685__1136__737
1	70.0	c17-0034_20170113_01__584__396__652__456
0	64.0	c17-0034_20170113_01__60__41__159__130
0	59.0	c17-0034_20170113_01__904__126__956__168
0	57.0	c17-0034_20170113_01__522__842__582__891
0	57.0	c17-0034_20170113_01__248__909__319__960
0	55.0	c17-0034_20170113_01__1172__91__1240__147
1	52.0	c17-0034_20170113_01__1226__412__1278__454
0	51.0	c17-0034_20170113_01__190__571__275__641
0	50.0	c17-0034_20170113_01__1165__647__1228__699
0	48.0	c17-0034_20170113_01__895__457__961__520
0	47.0	c17-0034_20170113_01__527__218__583__267
0	47.0	c17-0034_20170113_01__885__507__942__553
0	47.0	c17-0034_20170113_01__519__579__574__623
0	45.0	c17-0034_20170113_01__11__773__72__822
0	44.0	c17-0034_20170113_01__523__83__580__130
0	44.0	c17-0034_20170113_01__1035__381__1096__432
0	44.0	c17-0034_20170113_01__852__41__914__93
0	44.0	c17-0034_20170113_01__326__274__382__321
0	44.0	c17-0034_20170113_01__993__218__1052__270
0	44.0	c17-0034_20170113_01__104__212__151__250
0	43.0	c17-0034_20170113_01__972__60__1047__144
0	43.0	c17-0034_20170113_01__451__693__501__732
0	43.0	c17-0034_20170113_01__116__555__177__611
0	43.0	c17-0034_20170113_01__1172__622__1238__675
0	42.0	c17-0034_20170113_01__65__455__126__502
0	42.0	c17-0034_20170113_01__784__360__841__407
0	41.0	c17-0034_20170113_01__573__623__648__688
0	40.0	c17-0034_20170113_01__274__413__340__469
0	40.0	c17-0034_20170113_01__441__769__493__806
0	54.0	c15-663_20150806_01__522__783__574__826
0	54.0	c15-663_20150806_01__430__143__517__223
0	53.0	c15-663_20150806_01__703__240__762__289
0	53.0	c15-663_20150806_01__188__305__248__360
0	53.0	c15-663_20150806_01__343__534__407__597
0	52.0	c15-663_20150806_01__751__60__827__121
0	51.0	c15-663_20150806_01__925__299__982__346
0	50.0	c15-663_20150806_01__267__245__328__296
0	50.0	c15-663_20150806_01__215__839__295__909
0	50.0	c15-663_20150806_01__797__279__849__327
0	49.0	c15-663_20150806_01__243__283__305__335
0	49.0	c15-663_20150806_01__208__108__279__180
0	47.0	c15-663_20150806_01__181__567__228__604
0	47.0	c15-663_20150806_01__866__304__923__346
0	47.0	c15-663_20150806_01__608__298__653__338
0	45.0	c15-663_20150806_01__427__881__483__927
0	45.0	c15-663_20150806_01__622__402__684__453
0	45.0	c15-663_20150806_01__588__232__668__323
0	45.0	c15-663_20150806_01__930__699__977__737
0	42.0	c15-663_20150806_01__354__660__424__721
0	42.0	c15-663_20150806_01__1118__699__1170__737
0	41.0	c15-663_20150806_01__439__633__496__677
0	41.0	c15-663_20150806_01__1146__55__1196__99
0	41.0	c15-663_20150806_01__156__131__213__180
0	40.0	c15-663_20150806_01__215__697__272__744
0	40.0	c15-663_20150806_01__473__99__530__155
0	40.0	c15-663_20150806_01__422__783__481__832
0	41.0	c17-0311_20170517_01__330__627__392__679
0	45.0	c19-0604_20190729_01__692__341__754__402
0	41.0	c19-0604_20190729_01__619__323__699__402
1	57.0	c15-0641_20150724_01__4__669__70__725
0	50.0	c15-0641_20150724_01__256__792__312__848
1	50.0	c15-0641_20150724_01__975__344__1032__386
0	50.0	c15-0641_20150724_01__893__269__938__302
0	49.0	c15-0641_20150724_01__229__820__295__876
0	45.0	c15-0641_20150724_01__803__197__845__225
0	43.0	c15-0641_20150724_01__98__516__160__565
0	42.0	c15-0641_20150724_01__666__640__739__703
0	42.0	c15-0641_20150724_01__852__453__895__486
0	42.0	c15-0641_20150724_01__1005__345__1062__389
0	41.0	c15-0499_20150611_01__417__121__479__167
1	67.0	c19-0189_20190320_01__362__576__433__635
1	61.0	c19-0189_20190320_01__570__210__643__275
1	58.0	c19-0189_20190320_01__900__895__966__953
0	50.0	c19-0189_20190320_01__1111__202__1172__256
1	48.0	c19-0189_20190320_01__1049__867__1121__929
0	46.0	c19-0189_20190320_01__862__837__940__911
1	45.0	c19-0189_20190320_01__86__174__148__230
0	44.0	c19-0189_20190320_01__775__239__831__288
0	43.0	c19-0189_20190320_01__1026__355__1083__407
0	42.0	c19-0189_20190320_01__521__417__578__468
0	41.0	c19-0189_20190320_01__969__144__1029__190
0	40.0	c19-0189_20190320_01__-1__399__56__446
1	67.0	c17-0587_20170904_01__590__53__680__132
0	49.0	c17-0587_20170904_01__1097__479__1175__549
0	45.0	c17-0587_20170904_01__705__815__767__872
0	44.0	c17-0587_20170904_01__838__541__937__625
0	43.0	c17-0587_20170904_01__779__588__859__658
0	43.0	c17-0587_20170904_01__529__294__616__384
0	51.0	c15-0036_20150116_01__-1__885__65__941
0	51.0	c15-0036_20150116_01__1184__193__1245__250
1	47.0	c15-0036_20150116_01__606__65__670__118
0	45.0	c15-0036_20150116_01__568__408__620__454
1	43.0	c15-0036_20150116_01__1065__878__1138__948
0	42.0	c15-0036_20150116_01__359__569__411__616
1	42.0	c15-0036_20150116_01__359__569__411__616
0	51.0	c18-0611_20180906_01__453__815__566__927
0	47.0	c18-0611_20180906_01__701__161__775__225
0	44.0	c18-0624_20180912_01__510__301__592__375
0	41.0	c19-0221_20190329_01__456__325__510__372
0	43.0	c18-0309_20180511_01__495__227__580__297
0	63.0	c16-132_20160304_01__517__139__598__213
1	62.0	c16-132_20160304_01__495__405__575__478
0	61.0	c16-132_20160304_01__756__591__827__654
1	59.0	c16-132_20160304_01__573__32__648__97
0	52.0	c16-132_20160304_01__815__196__886__258
1	51.0	c16-132_20160304_01__552__834__627__898
0	49.0	c16-132_20160304_01__834__360__890__411
0	48.0	c16-132_20160304_01__367__304__421__351
0	47.0	c16-132_20160304_01__536__694__636__785
0	46.0	c16-132_20160304_01__957__653__1018__707
0	45.0	c16-132_20160304_01__884__188__938__232
0	45.0	c16-132_20160304_01__742__374__813__435
0	44.0	c16-132_20160304_01__650__885__726__946
0	43.0	c16-132_20160304_01__664__736__716__778
0	42.0	c16-132_20160304_01__169__195__272__255
0	40.0	c16-132_20160304_01__646__574__702__630
0	40.0	c16-132_20160304_01__60__137__121__188
0	44.0	c16-220_20160407_01__1008__674__1060__716
0	44.0	c16-220_20160407_01__243__522__297__564
0	42.0	c16-220_20160407_01__183__23__221__51
0	41.0	c16-220_20160407_01__299__848__347__881
0	40.0	c16-220_20160407_01__363__637__429__697
0	67.0	c16-600_20160816_01__481__827__561__897
0	64.0	c16-600_20160816_01__472__867__547__932
1	58.0	c16-600_20160816_01__556__622__635__694
0	52.0	c16-600_20160816_01__298__481__355__530
0	51.0	c16-600_20160816_01__428__212__489__266
1	49.0	c16-600_20160816_01__742__428__817__493
0	47.0	c16-600_20160816_01__586__533__673__610
0	45.0	c16-600_20160816_01__280__505__332__547
0	45.0	c16-600_20160816_01__735__74__790__121
0	43.0	c16-600_20160816_01__678__597__768__677
0	42.0	c16-600_20160816_01__871__655__923__697
0	42.0	c16-600_20160816_01__116__203__173__252
0	41.0	c16-600_20160816_01__865__497__936__561
0	40.0	c16-600_20160816_01__820__579__872__621
0	40.0	c16-600_20160816_01__231__219__291__270
1	67.0	c16-175_20160321_01__429__623__512__697
0	52.0	c16-175_20160321_01__1109__596__1172__645
0	46.0	c16-175_20160321_01__391__533__463__601
0	43.0	c16-175_20160321_01__439__551__496__602
0	42.0	c16-175_20160321_01__206__360__263__407
0	40.0	c16-175_20160321_01__83__341__159__416
0	40.0	c16-175_20160321_01__183__46__277__135
0	50.0	c19-0629_20190731_01__829__599__886__637
1	50.0	c19-0629_20190731_01__900__469__961__525
0	45.0	c19-0629_20190731_01__295__210__368__280
0	43.0	c19-0629_20190731_01__453__862__542__937
0	42.0	c19-0629_20190731_01__158__806__243__879
0	41.0	c19-0629_20190731_01__444__691__508__748
1	58.0	c16-261_20160420_01__802__405__902__511
0	49.0	c16-261_20160420_01__596__169__648__211
0	48.0	c16-261_20160420_01__596__374__643__411
0	46.0	c16-261_20160420_01__1221__560__1278__607
0	46.0	c16-261_20160420_01__197__383__259__430
0	45.0	c16-261_20160420_01__664__318__716__369
0	42.0	c16-261_20160420_01__577__881__653__965
0	42.0	c16-261_20160420_01__1031__136__1088__182
0	42.0	c16-261_20160420_01__616__100__667__142
0	41.0	c16-261_20160420_01__13__125__65__163
0	40.0	c16-261_20160420_01__1212__293__1254__325
0	64.0	c15-752_20150910_01__60__179__121__230
0	44.0	c15-752_20150910_01__387__553__439__593
0	43.0	c15-752_20150910_01__350__576__402__616
0	42.0	c15-727_20150827_01__854__498__928__556
0	74.0	c16-197_20160328_01__1123__542__1186__594
0	74.0	c16-197_20160328_01__584__317__662__387
0	73.0	c16-197_20160328_01__1097__303__1162__360
0	72.0	c16-197_20160328_01__1050__398__1111__454
0	70.0	c16-197_20160328_01__573__217__634__270
0	68.0	c16-197_20160328_01__176__115__256__188
0	68.0	c16-197_20160328_01__451__269__520__330
0	67.0	c16-197_20160328_01__565__738__639__806
0	65.0	c16-197_20160328_01__1001__469__1060__518
0	65.0	c16-197_20160328_01__13__465__70__521
0	64.0	c16-197_20160328_01__990__448__1037__488
0	63.0	c16-197_20160328_01__270__565__324__611
0	63.0	c16-197_20160328_01__808__862__872__913
0	62.0	c16-197_20160328_01__101__455__178__521
0	61.0	c16-197_20160328_01__312__308__385__374
0	59.0	c16-197_20160328_01__98__213__166__272
0	59.0	c16-197_20160328_01__960__192__1028__253
0	59.0	c16-197_20160328_01__1132__750__1197__803
0	59.0	c16-197_20160328_01__431__389__496__443
0	59.0	c16-197_20160328_01__952__81__1014__132
0	58.0	c16-197_20160328_01__985__507__1044__561
0	58.0	c16-197_20160328_01__1014__433__1085__496
0	58.0	c16-197_20160328_01__1037__369__1101__423
0	56.0	c16-197_20160328_01__213__779__289__847
0	56.0	c16-197_20160328_01__13__424__81__484
0	55.0	c16-197_20160328_01__1152__340__1204__382
0	55.0	c16-197_20160328_01__1060__174__1126__230
0	55.0	c16-197_20160328_01__905__759__958__806
0	55.0	c16-197_20160328_01__829__99__890__151
0	54.0	c16-197_20160328_01__894__253__957__302
0	54.0	c16-197_20160328_01__444__41__501__88
0	54.0	c16-197_20160328_01__376__450__437__501
0	54.0	c16-197_20160328_01__215__179__272__225
0	54.0	c16-197_20160328_01__1067__465__1137__530
0	54.0	c16-197_20160328_01__935__410__987__452
0	54.0	c16-197_20160328_01__596__193__655__245
0	53.0	c16-197_20160328_01__509__279__584__344
0	52.0	c16-197_20160328_01__958__788__1053__879
0	52.0	c16-197_20160328_01__349__51__429__121
0	52.0	c16-197_20160328_01__357__537__451__630
0	52.0	c16-197_20160328_01__275__798__330__846
0	52.0	c16-197_20160328_01__417__41__474__93
0	51.0	c16-197_20160328_01__399__769__465__820
0	51.0	c16-197_20160328_01__344__213__411__273
0	51.0	c16-197_20160328_01__225__254__286__306
0	51.0	c16-197_20160328_01__399__260__474__321
0	51.0	c16-197_20160328_01__165__567__226__621
0	50.0	c16-197_20160328_01__817__722__868__762
0	50.0	c16-197_20160328_01__345__437__406__488
0	50.0	c16-197_20160328_01__1074__376__1133__427
0	50.0	c16-197_20160328_01__1054__435__1116__493
0	50.0	c16-197_20160328_01__403__18__455__60
0	50.0	c16-197_20160328_01__1053__274__1105__316
0	50.0	c16-197_20160328_01__120__369__181__423
0	50.0	c16-197_20160328_01__701__11__783__90
0	50.0	c16-197_20160328_01__194__583__255__649
0	49.0	c16-197_20160328_01__751__598__803__640
0	49.0	c16-197_20160328_01__782__348__842__393
0	49.0	c16-197_20160328_01__519__773__589__838
0	49.0	c16-197_20160328_01__1036__535__1088__577
0	48.0	c16-197_20160328_01__340__579__392__621
0	48.0	c16-197_20160328_01__632__890__691__934
0	48.0	c16-197_20160328_01__911__299__977__355
0	48.0	c16-197_20160328_01__684__305__743__360
0	47.0	c16-197_20160328_01__635__303__691__350
0	47.0	c16-197_20160328_01__191__185__250__238
1	47.0	c16-197_20160328_01__41__155__121__225
0	47.0	c16-197_20160328_01__778__50__844__109
0	47.0	c16-197_20160328_01__666__645__726__696
0	47.0	c16-197_20160328_01__1214__291__1270__338
0	47.0	c16-197_20160328_01__555__795__619__851
0	47.0	c16-197_20160328_01__307__51__387__125
0	46.0	c16-197_20160328_01__641__328__704__387
0	46.0	c16-197_20160328_01__284__602__340__649
0	46.0	c16-197_20160328_01__225__211__277__253
0	46.0	c16-197_20160328_01__383__307__437__355
0	46.0	c16-197_20160328_01__1132__374__1198__430
0	46.0	c16-197_20160328_01__669__904__721__946
0	46.0	c16-197_20160328_01__1137__209__1217__279
0	46.0	c16-197_20160328_01__1031__551__1106__621
0	45.0	c16-197_20160328_01__403__691__469__745
0	45.0	c16-197_20160328_01__340__465__396__511
0	45.0	c16-197_20160328_01__166__439__218__481
0	45.0	c16-197_20160328_01__959__639__1060__730
0	45.0	c16-197_20160328_01__716__311__816__401
0	45.0	c16-197_20160328_01__1104__498__1183__565
0	44.0	c16-197_20160328_01__1062__79__1133__139
0	44.0	c16-197_20160328_01__83__336__140__382
0	44.0	c16-197_20160328_01__883__369__954__430
0	44.0	c16-197_20160328_01__564__338__615__381
0	43.0	c16-197_20160328_01__683__165__735__207
0	43.0	c16-197_20160328_01__427__785__485__834
0	43.0	c16-197_20160328_01__88__303__153__355
0	43.0	c16-197_20160328_01__149__291__232__370
0	43.0	c16-197_20160328_01__877__864__952__927
0	42.0	c16-197_20160328_01__-1__144__61__191
0	42.0	c16-197_20160328_01__1067__230__1147__309
0	42.0	c16-197_20160328_01__891__527__952__583
0	42.0	c16-197_20160328_01__865__806__928__863
0	41.0	c16-197_20160328_01__962__381__1025__432
0	41.0	c16-197_20160328_01__62__703__126__759
0	41.0	c16-197_20160328_01__457__708__516__759
0	41.0	c16-197_20160328_01__457__831__519__887
0	41.0	c16-197_20160328_01__110__-5__176__65
0	40.0	c16-197_20160328_01__431__427__483__469
0	40.0	c16-197_20160328_01__725__116__782__163
0	40.0	c16-197_20160328_01__803__618__869__674
0	40.0	c16-197_20160328_01__1012__751__1069__793
0	40.0	c16-197_20160328_01__792__365__858__421
1	58.0	c19-0519_20190628_01__807__708__892__789
1	53.0	c19-0519_20190628_01__732__191__801__252
0	50.0	c19-0519_20190628_01__624__728__695__787
0	44.0	c19-0519_20190628_01__277__546__352__611
0	42.0	c19-0519_20190628_01__445__806__521__871
0	40.0	c19-0519_20190628_01__770__595__827__641
0	40.0	c19-0519_20190628_01__536__603__590__650
0	45.0	c17-0459_20170720_01__500__510__556__561
0	44.0	c18-0103_20180226_01__621__244__680__293
0	65.0	c19-0593_20190723_01__1062__432__1193__595
0	65.0	c19-0593_20190723_01__728__318__850__435
0	62.0	c19-0593_20190723_01__609__401__743__586
0	49.0	c19-0593_20190723_01__669__818__728__874
0	45.0	c19-0292_20190426_01__92__760__188__840
0	48.0	c17-0663_20170926_01__1040__881__1102__937
0	46.0	c17-0663_20170926_01__1100__804__1144__869
0	43.0	c17-0663_20170926_01__330__818__408__895
0	40.0	c18-0608_20180906_01__532__674__603__739
1	66.0	c16-915_20161219_01__723__51__859__158
0	56.0	c16-915_20161219_01__720__518__798__595
0	53.0	c16-915_20161219_01__1072__374__1138__427
0	44.0	c16-915_20161219_01__213__389__281__445
0	55.0	c19-0438_20190605_01__1105__773__1217__883
0	41.0	c19-0438_20190605_01__194__408__262__473
0	62.0	c18-0650_20180920_01__481__214__556__289
0	44.0	c18-0650_20180920_01__519__255__571__304
0	42.0	c18-0650_20180920_01__868__450__938__507
0	41.0	c18-0650_20180920_01__596__325__657__381
1	53.0	c16-755_20161020_01__364__347__425__398
0	48.0	c16-755_20161020_01__326__857__392__909
0	41.0	c16-755_20161020_01__256__834__312__883
0	46.0	c17-0263_20170425_01__1003__713__1116__816
1	52.0	15-0003_20150106_01__827__668__918__755
0	40.0	15-0003_20150106_01__1146__369__1203__416
1	71.0	c19-0331_20190510_03__641__414__721__492
0	47.0	c19-0507_20190626_01__1116__34__1221__135
0	72.0	c16-517_20160713_01__1170__37__1245__102
1	64.0	c16-517_20160713_01__954__306__1035__381
0	63.0	c16-517_20160713_01__807__195__881__260
0	51.0	c16-517_20160713_01__161__305__241__376
0	49.0	c16-517_20160713_01__650__569__726__639
0	46.0	c16-517_20160713_01__84__13__160__78
0	46.0	c16-517_20160713_01__838__-5__904__46
0	45.0	c16-517_20160713_01__875__60__938__113
0	45.0	c16-517_20160713_01__541__117__593__161
0	44.0	c16-517_20160713_01__732__472__852__601
0	44.0	c16-517_20160713_01__1032__67__1103__132
0	43.0	c16-517_20160713_01__252__406__327__469
0	41.0	c16-517_20160713_01__133__-5__213__60
0	41.0	c16-517_20160713_01__633__825__699__885
0	41.0	c16-517_20160713_01__627__781__707__853
0	41.0	c16-517_20160713_01__-1__199__56__246
0	40.0	c16-517_20160713_01__514__-1__575__51
0	40.0	c16-517_20160713_01__870__474__952__567
0	40.0	c16-517_20160713_01__852__588__909__635
1	48.0	c19-0226_20190329_01__513__53__574__104
0	46.0	c19-0226_20190329_01__-5__69__51__116
1	45.0	c19-0226_20190329_01__234__862__309__923
1	45.0	c19-0226_20190329_01__1031__160__1078__197
0	42.0	c19-0226_20190329_01__789__792__841__834
0	42.0	c19-0226_20190329_01__775__353__822__395
0	41.0	c19-0226_20190329_01__1000__539__1047__577
0	41.0	c19-0226_20190329_01__688__303__754__359
0	41.0	c19-0226_20190329_01__88__-1__145__46
0	49.0	c20-0017_20200110_01__801__60__886__142
0	43.0	c18-0383_20180608_01__805__435__862__483
0	40.0	c18-0383_20180608_01__1031__493__1111__567
0	58.0	c18-0605_20180906_01__463__488__522__535
0	54.0	c18-0605_20180906_01__561__50__652__130
0	47.0	c18-0605_20180906_01__582__455__695__549
0	45.0	c18-0605_20180906_01__636__293__698__344
0	44.0	c18-0605_20180906_01__863__756__973__871
0	44.0	c18-0605_20180906_01__783__555__863__625
0	43.0	c18-0605_20180906_01__173__623__249__683
0	41.0	c18-0605_20180906_01__622__632__684__683
0	41.0	c18-0605_20180906_01__178__546__249__611
0	40.0	c18-0605_20180906_01__796__4__918__116
0	58.0	c18-0846_20181213_01__458__260__603__381
0	49.0	c18-0846_20181213_01__573__374__648__439
1	47.0	c18-0846_20181213_01__39__638__123__712
0	41.0	c18-0846_20181213_01__857__801__942__890
0	47.0	c18-0632_20180913_02__797__69__858__118
0	42.0	c16-833_20161117_01__188__257__256__316
0	57.0	c18-0139_20180312_01__94__404__164__464
0	55.0	c18-0139_20180312_01__345__325__406__379
0	54.0	c18-0139_20180312_01__664__853__716__897
0	53.0	c18-0139_20180312_01__737__351__799__411
0	53.0	c18-0139_20180312_01__1022__124__1076__168
1	52.0	c18-0139_20180312_01__1103__787__1174__848
0	50.0	c18-0139_20180312_01__504__608__570__664
0	49.0	c18-0139_20180312_01__381__360__428__395
0	49.0	c18-0139_20180312_01__961__113__1036__183
0	47.0	c18-0139_20180312_01__935__251__982__288
0	46.0	c18-0139_20180312_01__934__897__991__946
0	46.0	c18-0139_20180312_01__519__861__563__896
0	45.0	c18-0139_20180312_01__457__622__511__670
0	45.0	c18-0139_20180312_01__430__657__485__702
0	45.0	c18-0139_20180312_01__1184__260__1245__311
0	45.0	c18-0139_20180312_01__925__697__977__739
1	45.0	c18-0139_20180312_01__1081__155__1131__195
0	45.0	c18-0139_20180312_01__84__169__141__216
0	45.0	c18-0139_20180312_01__1226__793__1282__839
0	44.0	c18-0139_20180312_01__716__923__763__955
0	44.0	c18-0139_20180312_01__326__451__373__483
0	43.0	c18-0139_20180312_01__669__714__716__747
0	42.0	c18-0139_20180312_01__1041__188__1091__227
0	41.0	c18-0139_20180312_01__281__130__323__163
0	47.0	c15-727_20150827_02__453__744__565__845
0	46.0	c18-0410_20180620_01__545__18__685__125
0	40.0	c18-0410_20180620_01__385__237__497__358
0	62.0	c17-0267_20170502_01__-1__308__56__354
0	60.0	c17-0267_20170502_01__1216__655__1278__707
0	58.0	c17-0267_20170502_01__927__328__989__382
0	54.0	c17-0267_20170502_01__101__553__162__604
0	54.0	c17-0267_20170502_01__165__323__221__371
0	53.0	c17-0267_20170502_01__1017__797__1090__860
0	52.0	c17-0267_20170502_01__403__738__462__789
0	50.0	c17-0267_20170502_01__620__437__682__489
0	50.0	c17-0267_20170502_01__1170__183__1226__230
0	49.0	c17-0267_20170502_01__777__698__843__752
0	48.0	c17-0267_20170502_01__835__726__891__773
0	48.0	c17-0267_20170502_01__717__583__790__651
0	48.0	c17-0267_20170502_01__27__853__98__913
0	47.0	c17-0267_20170502_01__1151__717__1212__769
0	47.0	c17-0267_20170502_01__611__234__669__283
0	47.0	c17-0267_20170502_01__60__365__131__425
0	47.0	c17-0267_20170502_01__462__800__527__868
0	47.0	c17-0267_20170502_01__694__-3__762__48
0	47.0	c17-0267_20170502_01__408__526__465__575
0	46.0	c17-0267_20170502_01__857__193__914__244
0	46.0	c17-0267_20170502_01__1098__97__1158__148
0	46.0	c17-0267_20170502_01__115__9__167__51
0	46.0	c17-0267_20170502_01__339__712__392__760
0	45.0	c17-0267_20170502_01__389__-5__446__41
0	44.0	c17-0267_20170502_01__380__885__441__941
0	44.0	c17-0267_20170502_01__183__32__240__81
0	44.0	c17-0267_20170502_01__65__839__117__881
0	44.0	c17-0267_20170502_01__298__815__352__861
0	44.0	c17-0267_20170502_01__555__702__609__749
0	44.0	c17-0267_20170502_01__573__227__629__274
0	44.0	c17-0267_20170502_01__389__708__448__756
0	44.0	c17-0267_20170502_01__183__414__255__475
0	44.0	c17-0267_20170502_01__1043__390__1102__438
0	44.0	c17-0267_20170502_01__492__598__563__654
0	44.0	c17-0267_20170502_01__92__716__148__766
0	43.0	c17-0267_20170502_01__531__469__593__525
0	43.0	c17-0267_20170502_01__343__685__395__725
0	43.0	c17-0267_20170502_01__51__79__107__130
0	43.0	c17-0267_20170502_01__1041__650__1095__694
0	43.0	c17-0267_20170502_01__783__51__840__97
0	43.0	c17-0267_20170502_01__723__636__782__685
0	43.0	c17-0267_20170502_01__1179__599__1231__641
0	42.0	c17-0267_20170502_01__-1__514__56__561
0	42.0	c17-0267_20170502_01__1204__414__1264__464
0	42.0	c17-0267_20170502_01__903__165__959__213
0	42.0	c17-0267_20170502_01__893__786__957__837
0	42.0	c17-0267_20170502_01__820__199__886__255
0	42.0	c17-0267_20170502_01__490__551__566__616
0	42.0	c17-0267_20170502_01__573__569__629__621
0	41.0	c17-0267_20170502_01__985__700__1046__752
0	41.0	c17-0267_20170502_01__1207__183__1264__225
0	41.0	c17-0267_20170502_01__443__728__504__778
0	41.0	c17-0267_20170502_01__533__357__588__404
0	41.0	c17-0267_20170502_01__271__698__328__743
0	41.0	c17-0267_20170502_01__998__319__1052__359
0	40.0	c17-0267_20170502_01__4__137__65__183
0	40.0	c17-0267_20170502_01__683__599__735__641
0	40.0	c17-0267_20170502_01__669__299__730__351
0	40.0	c17-0267_20170502_01__-5__455__47__497
1	45.0	c15-0107_20150211_01__971__536__1039__595
0	45.0	c16-510_20160713_01__335__204__401__265
0	45.0	c16-510_20160713_01__282__193__334__235
0	44.0	c16-510_20160713_01__241__196__305__254
0	42.0	c16-510_20160713_01__632__128__693__187
0	40.0	c16-510_20160713_01__444__151__522__225
0	42.0	c15-0361_20150429_01__843__545__900__592
1	60.0	c16-13_20160108_01__719__711__792__779
0	60.0	c16-13_20160108_01__862__474__914__511
0	58.0	c16-13_20160108_01__568__556__629__606
0	49.0	c16-13_20160108_01__733__55__785__97
0	47.0	c16-13_20160108_01__1226__342__1287__396
0	47.0	c16-13_20160108_01__77__201__138__255
0	45.0	c16-13_20160108_01__110__260__162__297
0	43.0	c16-13_20160108_01__843__9__909__69
0	42.0	c16-13_20160108_01__330__341__378__379
0	41.0	c16-13_20160108_01__270__651__331__716
0	41.0	c16-13_20160108_01__1053__471__1119__530
0	41.0	c16-13_20160108_01__1104__351__1166__407
0	42.0	c19-0328_20190510_01__935__383__996__435
0	49.0	c19-0863_20191022_01__1138__846__1197__895
0	47.0	c19-0863_20191022_01__1113__94__1170__138
0	42.0	c19-0863_20191022_01__454__232__513__284
1	61.0	c15-0831_20151014_01__697__771__769__841
1	57.0	c15-0831_20151014_01__875__20__952__95
0	51.0	c15-0831_20151014_01__1151__246__1221__307
0	47.0	c15-0831_20151014_01__1207__862__1273__918
0	45.0	c15-0831_20151014_01__335__155__392__207
0	44.0	c15-0831_20151014_01__1070__739__1125__787
0	42.0	c15-0831_20151014_01__347__498__385__556
0	40.0	c15-0831_20151014_01__1099__485__1161__537
0	40.0	c15-0831_20151014_01__173__365__216__435
0	40.0	c15-0831_20151014_01__363__165__424__216
0	40.0	c15-0831_20151014_01__1146__65__1203__111
0	55.0	c19-0053_20190124_01__220__669__333__767
0	52.0	c19-0053_20190124_01__921__305__1000__374
0	47.0	c19-0102_20190219_01__587__218__671__288
0	41.0	c19-0102_20190219_01__94__465__158__525
0	40.0	c19-0102_20190219_01__848__446__900__497
0	40.0	c15-0476_20150609_01__981__660__1047__725
1	50.0	c19-0592_20190723_01__1116__469__1201__550
0	44.0	c19-0592_20190723_01__1184__764__1259__834
0	43.0	c19-0592_20190723_01__604__797__660__843
0	43.0	c19-0592_20190723_01__528__530__598__591
0	42.0	c19-0592_20190723_01__973__15__1028__62
0	41.0	c19-0592_20190723_01__41__876__93__918
1	41.0	c19-0592_20190723_01__1134__497__1191__543
0	41.0	c19-0592_20190723_01__555__622__611__668
0	40.0	c19-0592_20190723_01__256__517__305__561
0	40.0	c19-0592_20190723_01__1137__209__1193__251
0	49.0	c16-800_20161109_01__357__4__479__107
0	48.0	c16-800_20161109_01__169__383__226__437
0	46.0	c16-800_20161109_01__836__617__904__675
0	45.0	c16-800_20161109_01__596__714__670__781
0	44.0	c16-800_20161109_01__284__453__352__509
0	43.0	c16-800_20161109_01__829__179__918__258
0	42.0	c18-0136_20180829_02__476__365__552__425
0	40.0	c16-416_20160617_01__843__641__904__697
1	51.0	c16-506_20160711_01__312__279__373__335
0	40.0	c16-506_20160711_01__868__709__934__768
0	65.0	c16-746_20161019_01__350__99__424__168
0	55.0	c16-746_20161019_01__147__138__208__189
1	51.0	c16-746_20161019_01__774__452__837__505
0	47.0	c16-746_20161019_01__1157__625__1221__681
0	46.0	c16-746_20161019_01__739__533__799__582
0	45.0	c16-746_20161019_01__114__876__166__913
0	45.0	c16-746_20161019_01__898__671__968__746
0	44.0	c16-746_20161019_01__287__639__355__707
0	43.0	c16-746_20161019_01__1049__212__1115__268
0	42.0	c16-746_20161019_01__1099__76__1151__121
0	41.0	c16-746_20161019_01__126__160__178__207
0	40.0	c16-746_20161019_01__792__283__844__325
1	65.0	c16-199_20160330_01__423__294__505__372
0	44.0	c16-199_20160330_01__316__103__370__145
0	41.0	c16-199_20160330_01__1055__422__1110__466
0	41.0	c18-0766_20181107_02__1039__771__1093__815
0	48.0	c17-0672_20170925_01__606__490__672__553
0	46.0	c17-0672_20170925_01__640__509__698__560
0	44.0	c17-0672_20170925_01__394__383__469__453
0	41.0	c19-0565_20190717_01__343__37__451__144
0	41.0	c17-0872_20171130_01__1214__324__1280__382
0	40.0	c17-0872_20171130_01__751__820__836__890
1	54.0	c17-0597_20170907_01__147__398__213__456
1	60.0	c19-0817_20191011_01__628__43__710__125
1	51.0	c19-0817_20191011_01__813__709__882__774
1	47.0	c19-0817_20191011_01__1099__709__1163__766
0	47.0	c19-0817_20191011_01__618__469__703__546
0	47.0	c19-0817_20191011_01__376__240__435__290
0	45.0	c19-0817_20191011_01__529__873__597__932
1	42.0	c19-0817_20191011_01__408__102__474__158
0	41.0	c19-0817_20191011_01__284__721__345__772
1	41.0	c19-0817_20191011_01__550__312__607__359
0	41.0	c19-0817_20191011_01__352__221__409__263
0	40.0	c19-0817_20191011_01__91__787__162__843
0	40.0	c19-0817_20191011_01__444__451__514__507
0	40.0	c19-0817_20191011_01__857__198__916__247
0	43.0	c19-0413_20190530_01__897__616__949__663
0	44.0	c16-341_20160523_02__660__483__754__567
0	43.0	c16-341_20160523_02__724__817__788__874
0	53.0	15-0002_20150106_01__664__596__721__642
0	47.0	15-0002_20150106_01__1031__748__1101__812
1	47.0	15-0002_20150106_01__751__764__850__855
0	42.0	15-0002_20150106_01__988__647__1045__698
0	40.0	15-0002_20150106_01__1198__445__1256__492
1	45.0	c15-0243_20150401_01__631__750__714__822
1	64.0	C14-940_20140917_01__206__274__291__349
0	41.0	c19-0628_20190731_01__486__797__566__881
1	69.0	c15-1048_20151229_01__603__323__701__417
0	54.0	c19-0603_20190729_01__225__398__288__452
0	42.0	c19-0603_20190729_01__326__294__370__331
0	42.0	c19-0561_20190711_01__385__37__465__107
0	45.0	c15-0625_20150721_01__468__135__510__167
0	40.0	c15-0625_20150721_01__345__417__407__468
0	48.0	c17-0042_20170116_01__1132__274__1207__341
0	46.0	c17-0042_20170116_01__439__500__510__564
0	45.0	c17-0042_20170116_01__1061__245__1116__289
0	44.0	c17-0042_20170116_01__239__125__309__177
0	42.0	c17-0042_20170116_01__962__174__1037__237
0	50.0	c17-0626_20170914_02__739__410__829__496
0	47.0	c17-0626_20170914_02__691__474__766__549
0	57.0	c17-0656_20170925_01__1022__124__1104__192
0	48.0	c17-0656_20170925_01__60__265__163__349
0	42.0	c17-0656_20170925_01__1097__599__1163__657
0	42.0	c17-0656_20170925_01__1017__522__1094__606
0	42.0	c17-0656_20170925_01__363__327__423__381
1	62.0	c16-281_20160427_01__708__597__789__667
1	45.0	c16-281_20160427_01__896__694__971__767
0	40.0	c16-281_20160427_01__403__885__460__932
1	40.0	c16-281_20160427_01__403__885__460__932
1	56.0	c19-1007_20191211_01__488__296__568__364
0	50.0	c19-1007_20191211_01__912__555__964__597
0	48.0	c19-1007_20191211_01__257__131__316__179
0	46.0	c19-1007_20191211_01__196__379__293__480
0	41.0	c19-1007_20191211_01__1104__374__1158__421
0	41.0	c18-0789_20181115_01__688__207__740__253
0	41.0	c18-0789_20181115_01__557__239__615__290
0	50.0	c15-985_20151204_01__1169__671__1223__721
0	47.0	c15-985_20151204_01__747__60__808__116
0	44.0	c15-985_20151204_01__518__460__598__525
0	44.0	c15-985_20151204_01__1160__109__1231__169
0	43.0	c15-985_20151204_01__1170__857__1245__927
0	43.0	c15-985_20151204_01__691__341__738__407
0	42.0	c15-985_20151204_01__783__83__851__141
0	41.0	c15-985_20151204_01__1156__418__1240__488
0	40.0	c15-985_20151204_01__577__398__643__456
0	40.0	c15-985_20151204_01__1043__123__1081__183
0	45.0	c16-839_20161118_01__637__360__703__418
0	52.0	c16-931_20161223_01__1193__551__1268__616
1	50.0	c16-931_20161223_01__1162__326__1268__408
0	49.0	c16-931_20161223_01__1038__388__1132__470
0	42.0	c16-931_20161223_01__563__746__657__830
0	47.0	c17-0178_20170316_01__650__223__744__316
0	46.0	c17-0178_20170316_01__467__797__542__867
0	41.0	c17-0178_20170316_01__243__524__300__570
0	52.0	c15-0643_20150729_01__1165__341__1254__427
0	44.0	c15-0643_20150729_01__700__651__766__707
0	44.0	c19-0602_20190729_01__403__360__460__407
0	42.0	c19-0602_20190729_01__921__98__977__145
1	46.0	c15-0314_20150421_01__486__155__594__263
0	82.0	c17-0777_20171030_01__408__32__474__88
0	54.0	c17-0777_20171030_01__1230__799__1287__850
0	51.0	c17-0777_20171030_01__852__209__923__279
0	50.0	c17-0777_20171030_01__1160__835__1221__889
0	50.0	c17-0777_20171030_01__573__260__690__372
0	49.0	c17-0777_20171030_01__1097__239__1158__291
0	47.0	c17-0777_20171030_01__1100__811__1163__862
0	47.0	c17-0777_20171030_01__343__460__407__516
0	46.0	c17-0777_20171030_01__882__226__955__294
0	44.0	c17-0777_20171030_01__577__37__653__102
0	44.0	c17-0777_20171030_01__215__441__300__521
0	42.0	c17-0777_20171030_01__788__388__842__432
0	42.0	c17-0777_20171030_01__-5__37__65__102
0	41.0	c17-0777_20171030_01__638__465__699__516
0	41.0	c17-0777_20171030_01__618__190__678__243
0	41.0	c17-0777_20171030_01__618__733__674__780
0	41.0	c17-0777_20171030_01__939__712__1012__775
0	40.0	c17-0777_20171030_01__1184__483__1268__558
0	40.0	c17-0777_20171030_01__431__674__516__744
0	40.0	c17-0777_20171030_01__347__613__427__697
0	40.0	c17-0777_20171030_01__51__146__107__202
0	40.0	c17-0777_20171030_01__761__60__836__130
1	67.0	c15-1050_20151229_01__742__369__836__449
1	58.0	c15-1050_20151229_01__1081__269__1151__321
1	51.0	c15-1050_20151229_01__1212__13__1278__69
0	49.0	c15-1050_20151229_01__646__151__707__207
0	49.0	c15-1050_20151229_01__115__71__167__113
0	48.0	c15-1050_20151229_01__147__660__218__725
0	47.0	c15-1050_20151229_01__433__409__524__511
0	47.0	c15-1050_20151229_01__691__151__761__211
0	47.0	c15-1050_20151229_01__100__155__194__235
1	47.0	c15-1050_20151229_01__905__192__962__236
0	45.0	c15-1050_20151229_01__1137__96__1215__163
0	45.0	c15-1050_20151229_01__737__339__799__391
0	44.0	c15-1050_20151229_01__989__596__1078__675
0	44.0	c15-1050_20151229_01__18__674__75__725
0	44.0	c15-1050_20151229_01__1061__366__1127__427
0	43.0	c15-1050_20151229_01__509__834__584__899
0	43.0	c15-1050_20151229_01__184__197__241__239
0	43.0	c15-1050_20151229_01__55__683__131__758
0	42.0	c15-1050_20151229_01__939__517__1010__589
0	42.0	c15-1050_20151229_01__770__613__855__688
0	42.0	c15-1050_20151229_01__1041__157__1115__223
0	41.0	c15-1050_20151229_01__1179__707__1264__791
0	41.0	c15-1050_20151229_01__646__227__707__283
0	41.0	c15-1050_20151229_01__678__308__749__373
0	41.0	c15-1050_20151229_01__439__890__505__951
0	41.0	c15-1050_20151229_01__432__567__508__627
0	41.0	c15-1050_20151229_01__925__899__987__946
0	40.0	c15-1050_20151229_01__285__307__351__367
0	40.0	c15-1050_20151229_01__312__409__387__488
0	40.0	c15-1050_20151229_01__683__525__758__586
0	51.0	c19-0633_20190805_02__697__494__763__547
0	46.0	c19-0633_20190805_02__776__737__835__783
0	44.0	c19-0633_20190805_02__819__672__906__744
0	44.0	c19-0633_20190805_02__690__623__752__680
0	41.0	c19-0633_20190805_02__949__516__1029__591
0	55.0	c20-0025_20200114_01__13__650__123__756
0	54.0	c20-0025_20200114_01__1119__770__1217__856
0	53.0	c20-0025_20200114_01__593__667__677__741
0	53.0	c20-0025_20200114_01__175__647__244__702
0	51.0	c20-0025_20200114_01__742__881__808__937
0	50.0	c20-0025_20200114_01__354__638__414__688
1	50.0	c20-0025_20200114_01__788__25__854__83
0	50.0	c20-0025_20200114_01__316__797__370__841
0	49.0	c20-0025_20200114_01__248__579__323__644
0	49.0	c20-0025_20200114_01__225__689__295__752
0	47.0	c20-0025_20200114_01__1188__360__1259__416
0	45.0	c20-0025_20200114_01__552__333__612__384
0	44.0	c20-0025_20200114_01__297__759__352__805
0	43.0	c20-0025_20200114_01__1149__109__1215__164
0	42.0	c20-0025_20200114_01__286__543__343__592
0	42.0	c20-0025_20200114_01__74__365__154__435
0	42.0	c20-0025_20200114_01__74__821__131__863
0	42.0	c20-0025_20200114_01__893__560__954__616
0	42.0	c20-0025_20200114_01__272__783__343__848
0	42.0	c20-0025_20200114_01__389__628__464__692
0	41.0	c20-0025_20200114_01__1036__717__1102__775
0	41.0	c20-0025_20200114_01__376__899__435__946
0	41.0	c20-0025_20200114_01__282__611__360__688
0	40.0	c20-0025_20200114_01__646__867__716__918
0	40.0	c20-0025_20200114_01__925__123__977__169
0	40.0	c20-0025_20200114_01__504__169__561__216
0	40.0	c20-0025_20200114_01__1174__9__1226__55
0	40.0	c20-0025_20200114_01__973__688__1028__732
1	73.0	c17-0117_20170221_01__742__255__855__367
0	71.0	c17-0117_20170221_01__80__759__154__822
1	62.0	c17-0117_20170221_01__707__285__788__358
0	47.0	c17-0117_20170221_01__128__308__224__389
0	45.0	c17-0117_20170221_01__1028__771__1106__836
0	44.0	c17-0117_20170221_01__879__618__944__673
0	44.0	c17-0117_20170221_01__911__-1__982__51
0	43.0	c17-0117_20170221_01__534__897__593__948
0	43.0	c17-0117_20170221_01__746__753__851__848
0	43.0	c17-0117_20170221_01__249__308__305__357
0	40.0	c17-0117_20170221_01__925__607__1001__681
0	40.0	c17-0117_20170221_01__916__293__968__335
1	59.0	c18-0496_20180725_01__519__32__588__93
0	45.0	c18-0496_20180725_01__1092__200__1161__270
0	43.0	c18-0496_20180725_01__535__265__662__358
0	40.0	c18-0496_20180725_01__1123__360__1212__439
0	54.0	c18-0750_20181101_01__1063__791__1131__855
0	51.0	c18-0750_20181101_01__815__124__888__189
0	50.0	c18-0750_20181101_01__935__97__1001__163
0	47.0	c18-0750_20181101_01__435__895__503__955
0	47.0	c18-0750_20181101_01__365__772__432__828
0	47.0	c18-0750_20181101_01__616__43__708__127
0	46.0	c18-0750_20181101_01__888__99__940__141
0	43.0	c18-0750_20181101_01__497__617__563__675
0	43.0	c18-0750_20181101_01__85__433__152__489
0	43.0	c18-0750_20181101_01__562__242__610__289
0	42.0	c18-0750_20181101_01__18__674__103__749
0	42.0	c18-0750_20181101_01__540__416__597__463
0	42.0	c18-0750_20181101_01__229__383__309__458
0	41.0	c18-0750_20181101_01__815__697__872__753
0	40.0	c18-0750_20181101_01__408__839__460__886
0	40.0	c18-0750_20181101_01__629__251__704__325
0	44.0	c18-0063_20180126_01__891__220__953__270
0	41.0	c18-0063_20180126_01__765__630__817__672
0	41.0	c18-0063_20180126_01__633__293__685__335
0	40.0	c18-0063_20180126_01__276__353__323__386
1	43.0	c18-0704_20181017_01__693__340__752__389
0	41.0	c18-0704_20181017_01__65__693__168__772
0	46.0	c16-797_20161109_01__126__524__201__584
0	44.0	c16-797_20161109_01__227__731__291__784
1	54.0	c16-589_20160810_01__144__340__220__408
0	51.0	c16-589_20160810_01__761__599__808__641
0	48.0	c16-589_20160810_01__1118__435__1187__496
1	48.0	c16-589_20160810_01__456__341__522__404
0	46.0	c16-589_20160810_01__270__540__327__583
0	46.0	c16-589_20160810_01__297__110__352__153
0	46.0	c16-589_20160810_01__9__109__56__146
0	45.0	c16-589_20160810_01__1140__112__1198__160
0	45.0	c16-589_20160810_01__303__876__352__911
0	45.0	c16-589_20160810_01__307__626__364__678
0	44.0	c16-589_20160810_01__994__74__1046__113
0	44.0	c16-589_20160810_01__58__8__140__76
0	42.0	c16-589_20160810_01__385__398__457__456
0	42.0	c16-589_20160810_01__990__457__1046__507
0	42.0	c16-589_20160810_01__779__597__831__639
0	41.0	c16-589_20160810_01__798__521__850__567
0	41.0	c16-589_20160810_01__678__837__735__883
0	41.0	c16-589_20160810_01__787__483__839__525
0	41.0	c16-589_20160810_01__464__239__516__281
0	41.0	c16-589_20160810_01__1113__641__1184__702
0	40.0	c16-589_20160810_01__1017__469__1078__521
0	56.0	c19-1043_20191224_01__4__660__84__730
0	52.0	c19-1043_20191224_01__555__27__616__79
0	44.0	c19-1043_20191224_01__871__347__926__398
0	59.0	c19-0587_20190725_01__233__453__338__555
1	51.0	c19-0587_20190725_01__110__764__191__834
0	51.0	c19-0587_20190725_01__709__155__822__263
1	50.0	c19-0587_20190725_01__887__402__966__472
0	42.0	c19-0587_20190725_01__716__269__797__347
0	41.0	c19-0587_20190725_01__15__147__75__196
0	40.0	c19-0587_20190725_01__220__504__328__574
0	54.0	c19-0142_20190305_01__9__479__70__535
0	51.0	c19-0142_20190305_01__527__496__603__564
0	50.0	c19-0142_20190305_01__1212__331__1275__398
0	49.0	c19-0142_20190305_01__689__720__790__818
0	49.0	c19-0142_20190305_01__939__246__1024__316
0	49.0	c19-0142_20190305_01__206__308__277__368
0	45.0	c19-0142_20190305_01__1212__255__1278__325
0	44.0	c19-0142_20190305_01__765__136__822__184
0	42.0	c19-0142_20190305_01__977__400__1038__455
0	42.0	c19-0142_20190305_01__96__405__176__475
0	42.0	c19-0142_20190305_01__-5__199__47__251
0	41.0	c19-0142_20190305_01__1058__813__1117__860
0	41.0	c19-0142_20190305_01__697__409__758__465
0	41.0	c19-0142_20190305_01__289__369__355__453
0	40.0	c19-0142_20190305_01__257__193__309__239
0	48.0	c16-148_20160309_01__826__608__890__661
0	45.0	c16-148_20160309_01__660__583__735__649
0	45.0	c16-148_20160309_01__271__501__341__562
0	44.0	c16-148_20160309_01__718__698__786__756
0	43.0	c16-148_20160309_01__1207__683__1278__744
0	42.0	c16-148_20160309_01__667__489__737__552
0	42.0	c16-148_20160309_01__664__397__716__439
0	41.0	c16-148_20160309_01__606__469__694__541
0	41.0	c16-148_20160309_01__345__85__421__163
0	40.0	c16-148_20160309_01__248__104__319__165
1	66.0	c16-595_20160816_01__293__632__401__739
0	63.0	c18-0317_20180515_01__802__357__870__416
0	54.0	c18-0317_20180515_01__623__137__682__187
0	51.0	c18-0317_20180515_01__917__398__964__434
0	51.0	c18-0317_20180515_01__756__122__810__166
1	51.0	c18-0317_20180515_01__952__81__1018__135
1	50.0	c18-0317_20180515_01__215__46__272__93
0	49.0	c18-0317_20180515_01__133__107__194__158
0	47.0	c18-0317_20180515_01__434__708__491__754
0	47.0	c18-0317_20180515_01__550__651__613__704
0	47.0	c18-0317_20180515_01__1055__117__1103__153
0	47.0	c18-0317_20180515_01__253__198__309__245
0	46.0	c18-0317_20180515_01__804__332__856__374
0	46.0	c18-0317_20180515_01__573__669__643__735
0	46.0	c18-0317_20180515_01__1202__474__1250__516
0	44.0	c18-0317_20180515_01__634__638__684__680
0	44.0	c18-0317_20180515_01__911__588__973__639
0	44.0	c18-0317_20180515_01__435__651__501__707
0	44.0	c18-0317_20180515_01__537__546__598__602
0	44.0	c18-0317_20180515_01__770__374__831__421
0	44.0	c18-0317_20180515_01__888__116__935__158
0	43.0	c18-0317_20180515_01__1153__18__1214__67
0	42.0	c18-0317_20180515_01__977__839__1029__886
0	42.0	c18-0317_20180515_01__725__123__782__165
0	42.0	c18-0317_20180515_01__602__329__659__378
0	41.0	c18-0317_20180515_01__829__126__892__187
0	41.0	c18-0317_20180515_01__885__704__956__769
0	41.0	c18-0317_20180515_01__380__507__432__549
0	40.0	c18-0317_20180515_01__1120__551__1175__597
0	56.0	c18-0012_20180108_01__774__657__840__716
0	53.0	c18-0012_20180108_01__930__146__1005__211
0	53.0	c18-0012_20180108_01__341__-1__405__57
0	49.0	c18-0012_20180108_01__405__96__476__156
0	45.0	c18-0012_20180108_01__614__337__684__397
0	44.0	c18-0012_20180108_01__971__151__1028__195
0	44.0	c18-0012_20180108_01__968__183__1023__227
0	43.0	c18-0012_20180108_01__1087__403__1153__461
0	41.0	c18-0012_20180108_01__981__867__1043__923
0	41.0	c18-0012_20180108_01__921__732__987__793
1	41.0	c18-0012_20180108_01__377__-1__429__51
0	40.0	c18-0012_20180108_01__806__332__862__379
0	46.0	c15-933_20151113_01__312__858__359__891
0	41.0	c15-933_20151113_01__911__304__982__369

## Sheet: External_Test_reviewed_positive
image ID
c19-0189_20190320_01
c16-746_20161019_01
c20-0025_20200114_01
c16-600_20160816_01
15-0003_20150106_01
C14-940_20140917_01
c15-0314_20150421_01
c16-755_20161020_01
c16-589_20160810_01
c16-199_20160330_01
c19-0255_20190415_01
c19-0331_20190510_02
c19-0817_20191011_01
c18-0786_20181114_01
c17-0171_20170313_01
c19-0630_20190731_01
c16-586_20160809_01
c17-0034_20170113_01
c19-0519_20190628_01
c17-0105_20170216_01
c16-175_20160321_01
c17-0770_20171030_01
c18-0846_20181213_01
c18-0461_20180712_01
c17-0069_20170125_01
c19-0226_20190329_01
c16-595_20160816_01
c15-1050_20151229_01
c16-915_20161219_01
c18-0208_20180330_01
c16-261_20160420_01
c17-0117_20170221_01
c17-0597_20170907_01
c19-1007_20191211_01
c15-0036_20150116_01
C14-991_20140925_01
c15-1048_20151229_01
c18-0012_20180108_01
c15-0107_20150211_01
c18-0704_20181017_01
c15-675_20150807_01
c15-0099_20150205_01
c16-281_20160427_01
c19-0592_20190723_01
c16-13_20160108_01
c17-0188_20170322_01
c19-0587_20190725_01
c16-132_20160304_01
c19-0629_20190731_01
c17-0587_20170904_01
c17-0810_20171108_01
c15-0243_20150401_01
c18-0317_20180515_01
c19-0331_20190510_03
c16-931_20161223_01
15-0002_20150106_01
c19-0455_20190613_01
c18-0139_20180312_01
c15-0831_20151014_01
c16-197_20160328_01
c16-517_20160713_01
c18-0496_20180725_01
c15-0641_20150724_01
c16-506_20160711_01

## Sheet: External_Test_DLS_positive
image ID
c19-0189_20190320_01
c16-746_20161019_01
c20-0025_20200114_01
c16-600_20160816_01
C14-940_20140917_01
c16-199_20160330_01
c19-0255_20190415_01
c17-0920_20171219_01
c19-0817_20191011_01
c17-0171_20170313_01
c19-0630_20190731_01
c19-0438_20190605_01
c16-450_20160627_01
c17-0501_20170808_01
c16-586_20160809_01
c17-0267_20170502_01
c17-0034_20170113_01
c19-0519_20190628_01
c17-0105_20170216_01
c16-175_20160321_01
c17-0770_20171030_01
c18-0846_20181213_01
c17-0069_20170125_01
c18-0056_20180129_01
c16-202_20160330_01
c15-752_20150910_01
c16-595_20160816_01
c15-1050_20151229_01
c16-915_20161219_01
c15-0637_20150723_01
c16-261_20160420_01
c17-0117_20170221_01
c18-0785_20181114_01
c17-0934_20171222_01
c19-1007_20191211_01
c15-1048_20151229_01
c17-0488_20170804_01
c19-1043_20191224_01
c18-0012_20180108_01
c19-0593_20190723_01
c18-0650_20180920_01
c15-675_20150807_01
c15-0099_20150205_01
c16-281_20160427_01
c16-13_20160108_01
c17-0188_20170322_01
c19-0587_20190725_01
c16-132_20160304_01
c16-943_20161228_01
c17-0587_20170904_01
c17-0810_20171108_01
c17-0010_20170106_01
c18-0317_20180515_01
c18-0605_20180906_01
c19-0331_20190510_03
c17-0777_20171030_01
c19-0053_20190124_01
c18-0139_20180312_01
c15-0831_20151014_01
c16-197_20160328_01
c17-0656_20170925_01
c16-517_20160713_01
c18-0496_20180725_01
c17-0412_20170629_01
c15-0641_20150724_01
